# Supplementary material for: Iron-catalyzed epoxidation of olefins using hydrogen peroxide
Source: Royal Society of Chemistry journal article supplement (doi:10.1039/c0gc00943a), 2011-01-01

Supplementary Information for

**Iron-catalyzed epoxidation of olefins using hydrogen peroxide**

Kamrul Hasan, Nicole Brown and Christopher M. Kozak\*

*Department of Chemistry, Memorial University of Newfoundland,  
St. John's, Newfoundland, Canada A1B 3X7*

\* Corresponding author. E-mail: [ckozak@mun.ca](mailto:ckozak@mun.ca)

*Contents*

|                                                                  |     |
|------------------------------------------------------------------|-----|
| GC traces and mass spectra of selected products given in Table 1 | S2  |
| GC traces and mass spectra of selected products given in Table 2 | S6  |
| GC traces and mass spectra of selected products given in Table 3 | S14 |
| GC traces and mass spectra of selected products given in Table 4 | S22 |
| GC traces and mass spectra of selected products given in Table 5 | S38 |
| GC traces and mass spectra of selected products given in Table 6 | S42 |
| Reaction progress monitoring                                     | S46 |

**GC Traces and Mass Spectra of Selected Products Given in Table 1:**

**Entry 1:** Dodecane internal standard,  $R_t = 5.08$  min. *trans*-Stilbene,  $R_t = 8.54$  min. *trans*-Stilbene oxide,  $R_t = 8.61$  min.

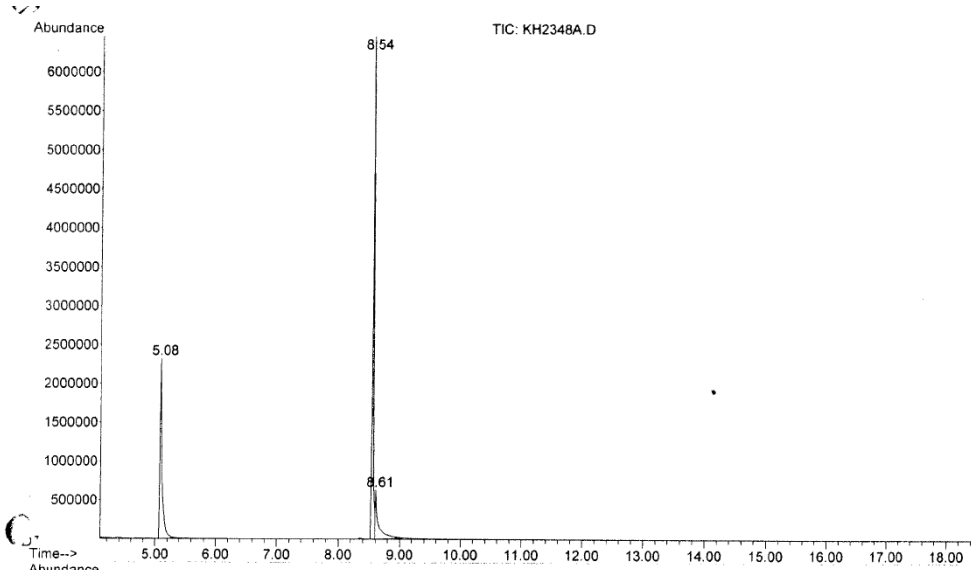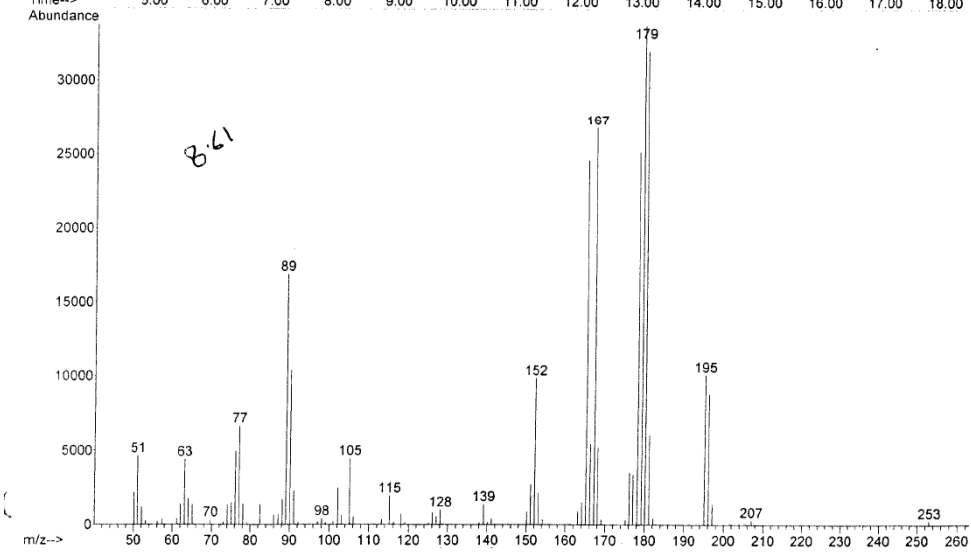

**Entry 5:** Dodecane internal standard,  $R_t = 5.08$  min. *trans*-Stilbene,  $R_t = 8.54$  min.  
*trans*-Stilbene oxide,  $R_t = 8.60$  min.

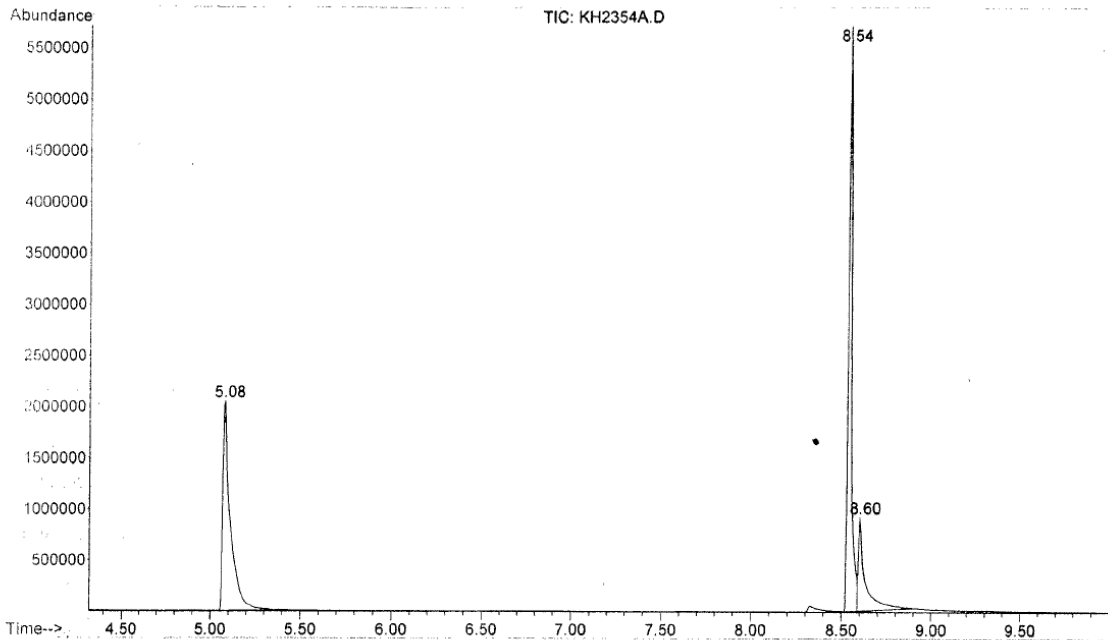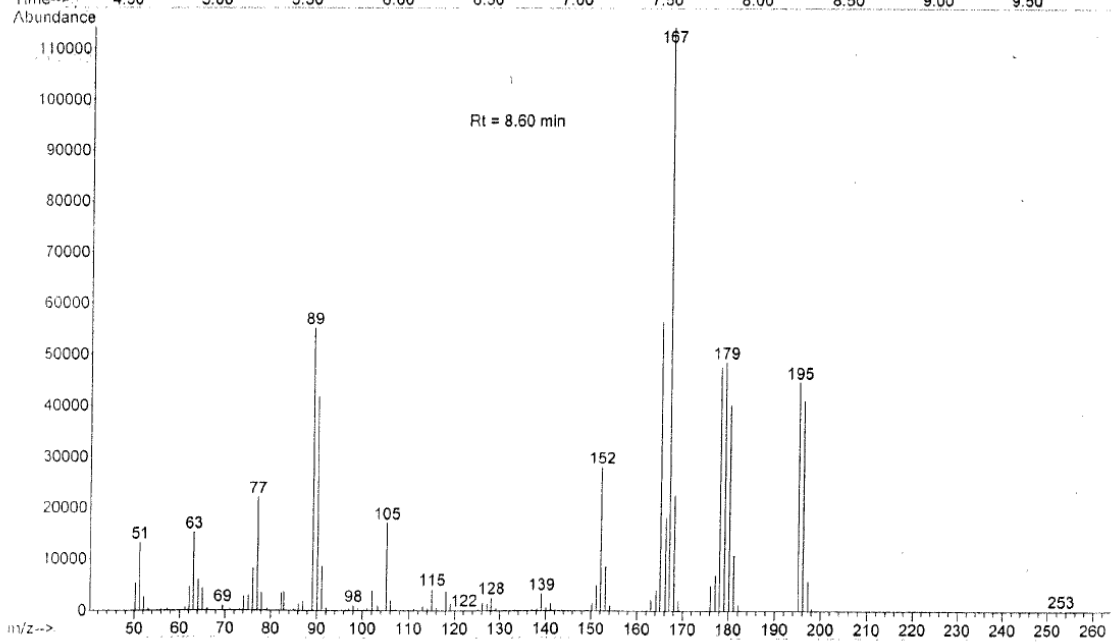

**Entry 6 at room temperature (for Entry 6 at 65 °C see Table 2, Entry 1, below):**  
Dodecane internal standard,  $R_t = 5.08$  min. *trans*-Stilbene,  $R_t = 8.54$  min. *trans*-Stilbene  
oxide,  $R_t = 8.60$  min. Isomer of *trans*-Stilbene oxide,  $R_t = 8.32$  min.

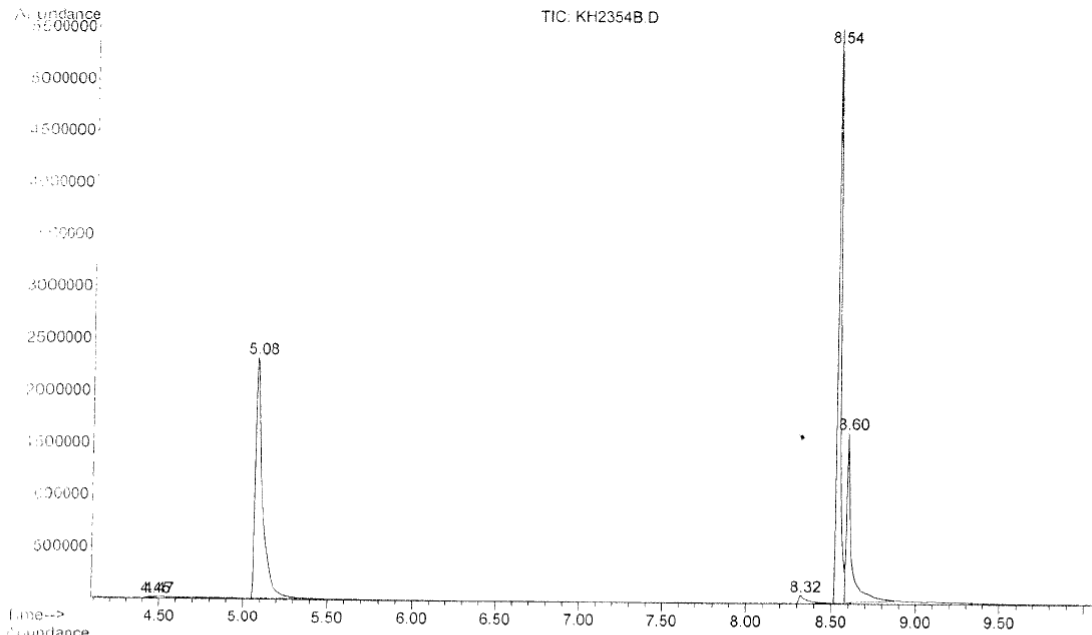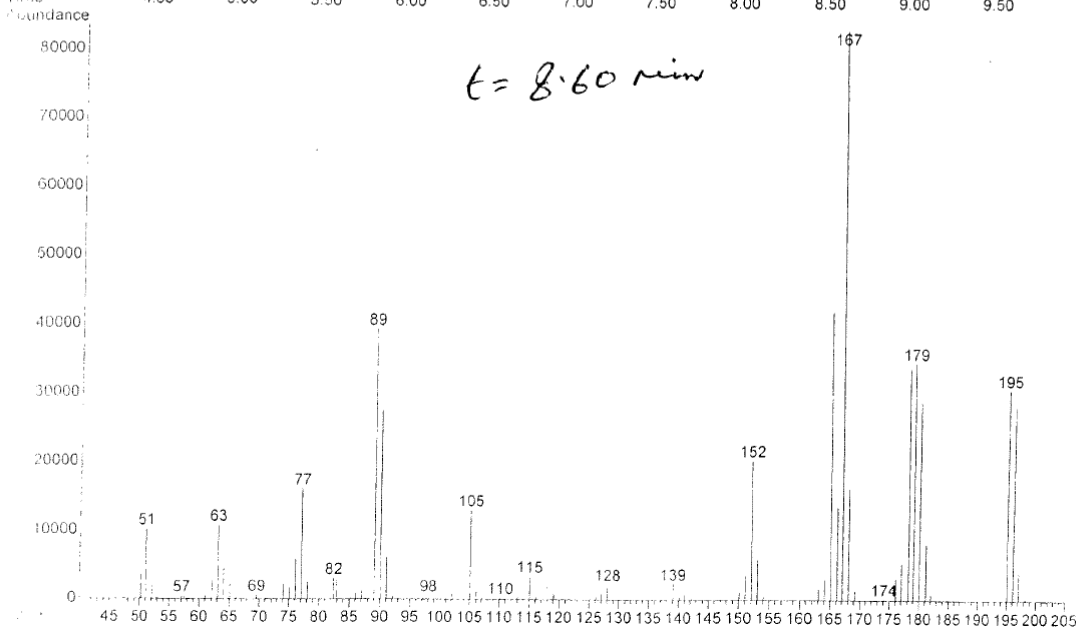

**GC Traces and Mass Spectra of Selected Products Given in Table 2:**

**Entry 1 (Also Table 1, Entry 6 at 65 °C and Table 3, Entry 5):** Dodecane internal standard,  $R_t = 6.138$  min. *trans*-Stilbene oxide,  $R_t = 10.837$  min. Isomer of *trans*-Stilbene oxide,  $R_t = 10.468$  min. Unidentified by-product,  $R_t = 11.008$  min.

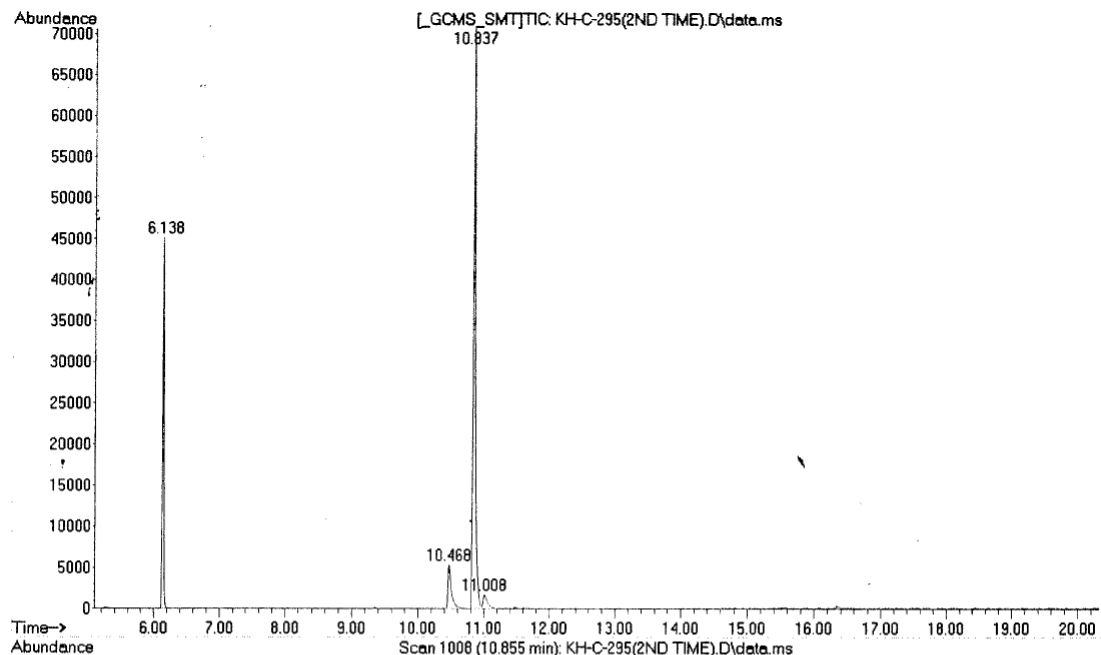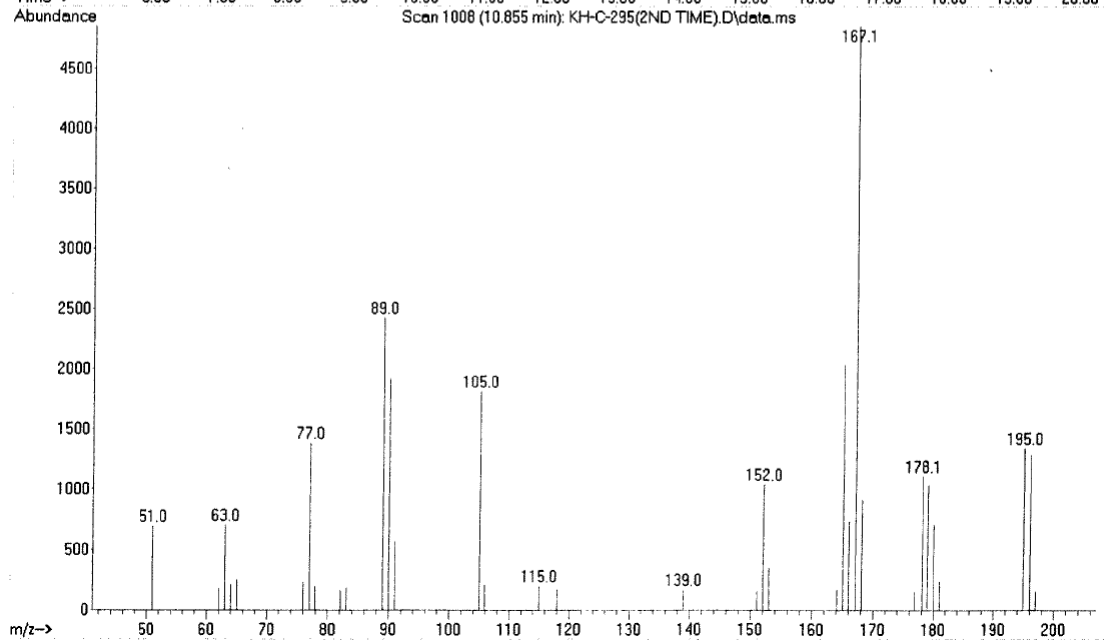

**Entry 2:** Dodecane internal standard,  $R_t = 6.141$  min. *trans*-Stilbene oxide,  $R_t = 10.845$  min. Isomer of *trans*-Stilbene oxide,  $R_t = 10.476$  min. Unidentified by-product,  $R_t = 11.030$  min.

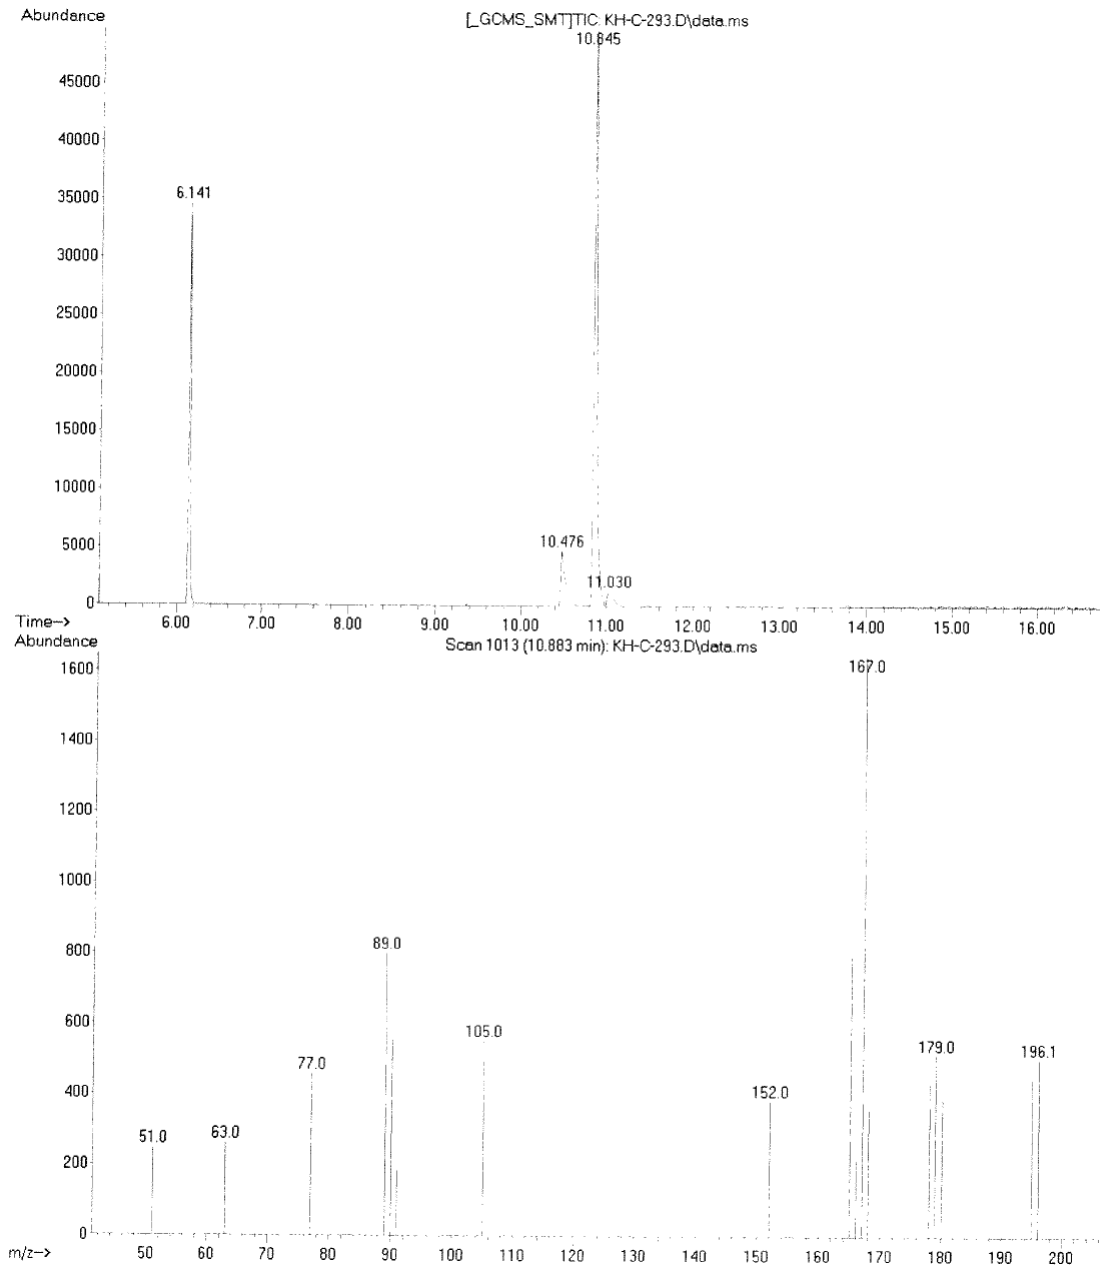

**Entry 6:** Dodecane internal standard,  $R_t = 6.182$  min. *trans*-Stilbene,  $R_t = 10.796$  min.  
*trans*-Stilbene oxide,  $R_t = 10.881$  min.

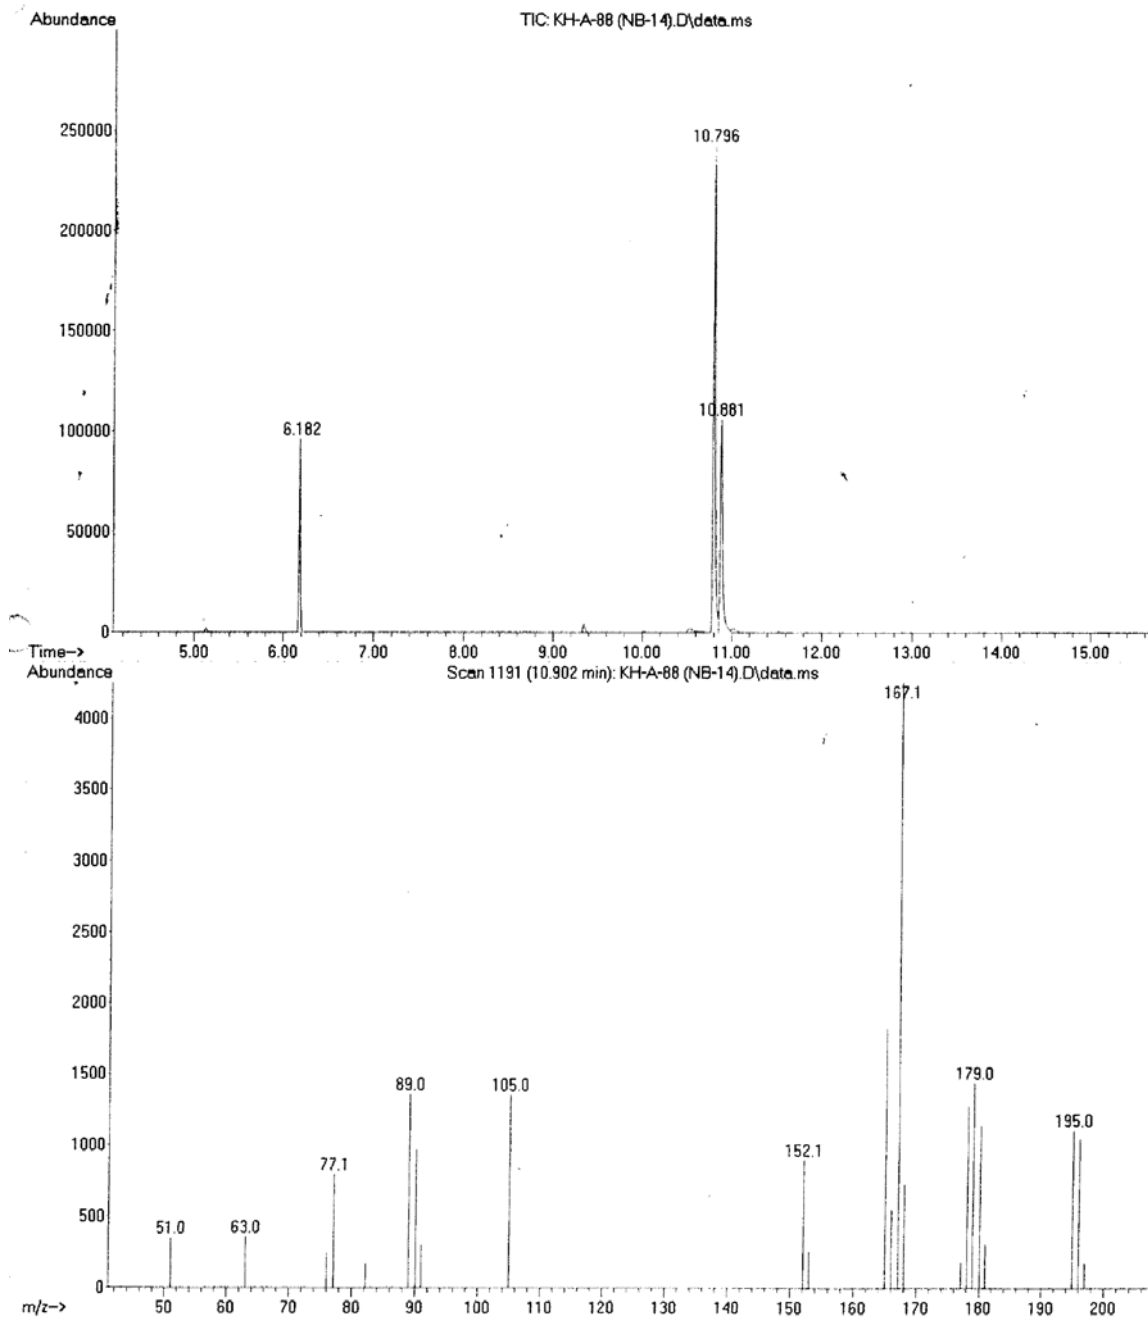

**Entry 7:** Dodecane internal standard,  $R_t = 7.249$  min. *trans*-Stilbene,  $R_t = 10.715$  min.  
*trans*-Stilbene oxide,  $R_t = 10.779$  min.

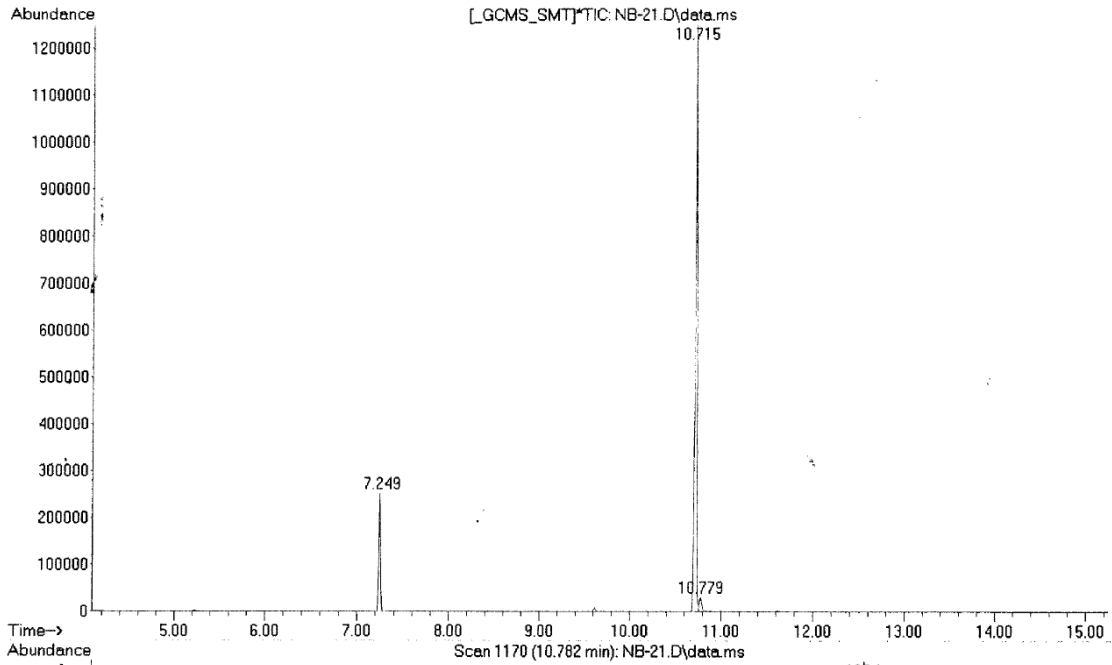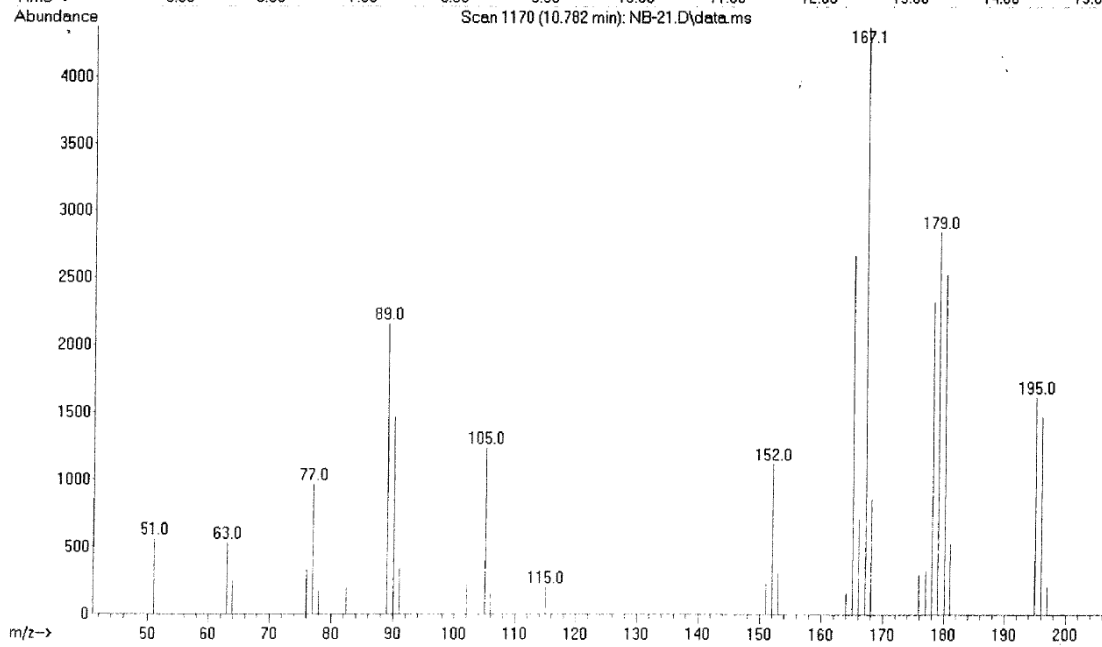



**Entry 8:** Dodecane internal standard,  $R_t = 7.248$  min. *trans*-Stilbene,  $R_t = 10.713$  min.  
*trans*-Stilbene oxide,  $R_t = 10.776$  min.

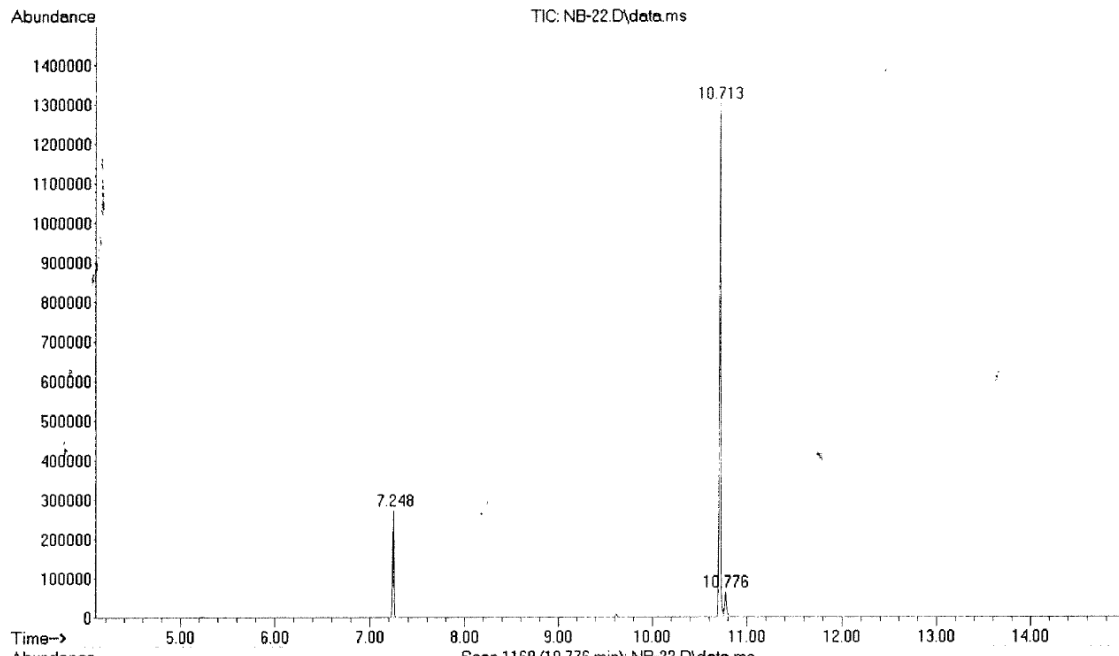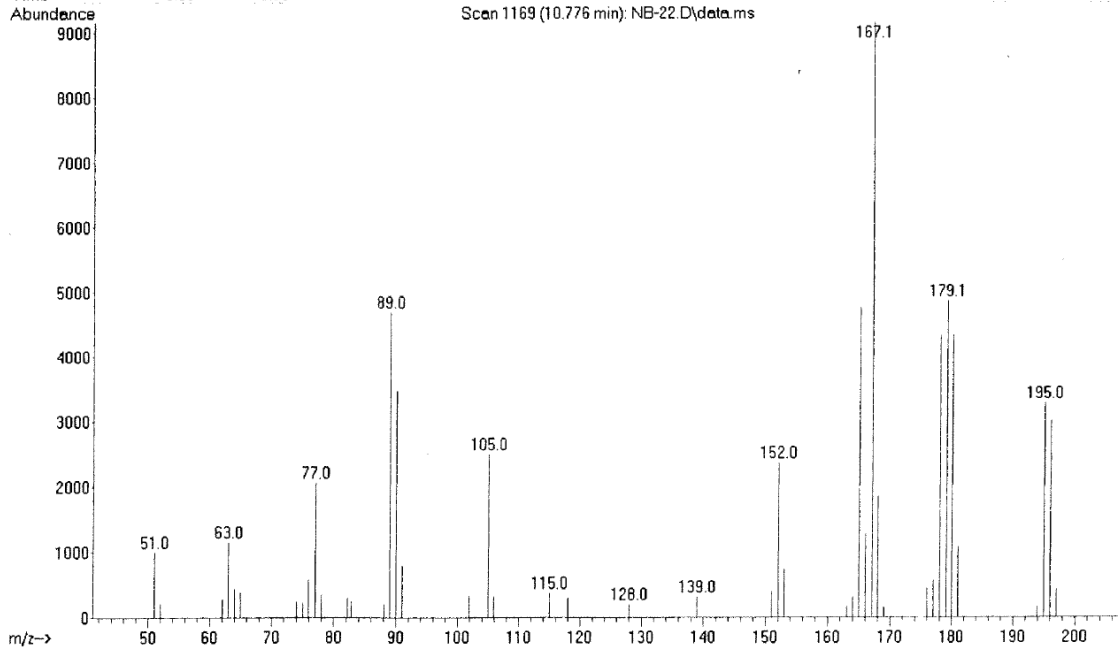

**Entry 9:** Dodecane internal standard,  $R_t = 6.182$  min. *trans*-Stilbene,  $R_t = 10.793$  min.  
*trans*-Stilbene oxide,  $R_t = 10.880$  min.

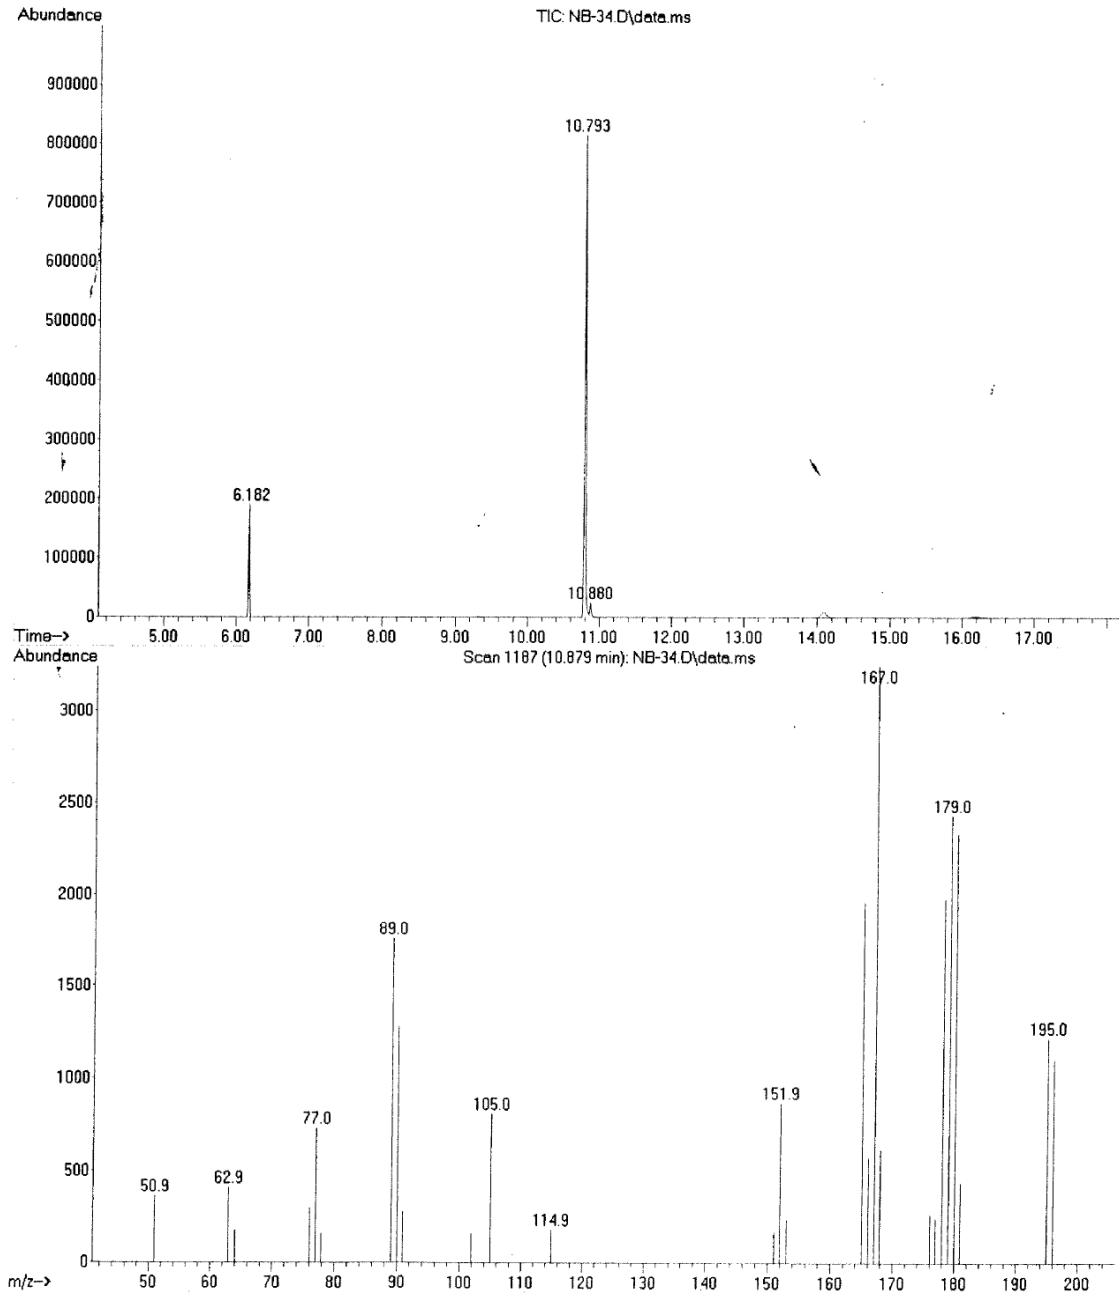

**Entry 10:** Dodecane internal standard,  $R_t = 6.181$  min. *trans*-Stilbene,  $R_t = 10.879$  min.  
*trans*-Stilbene oxide,  $R_t = 10.986$  min.

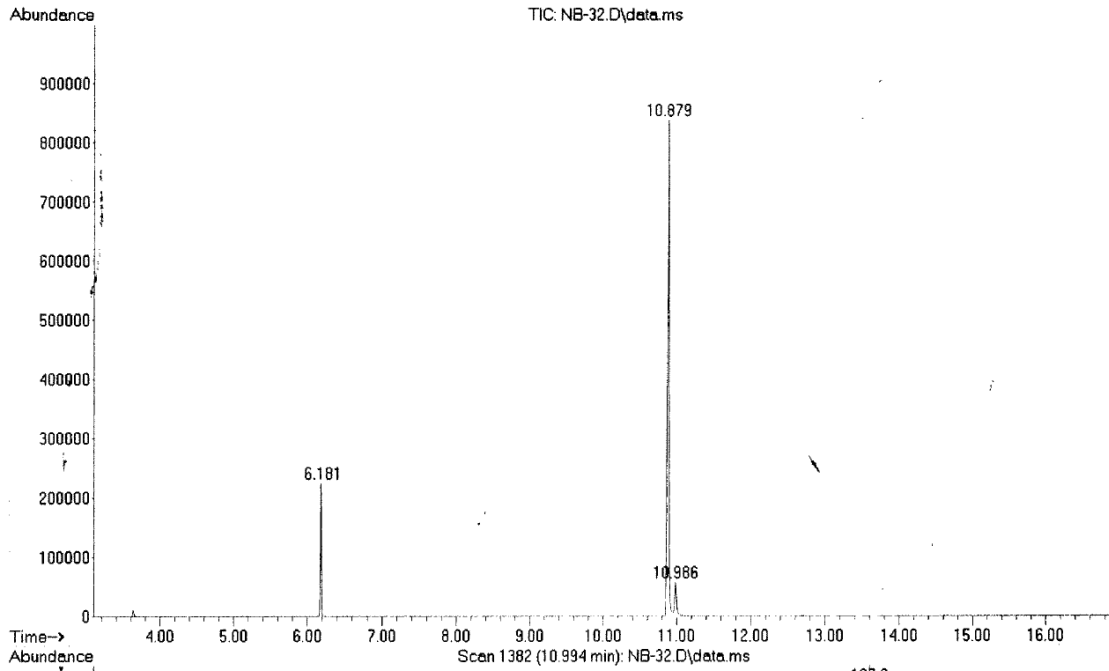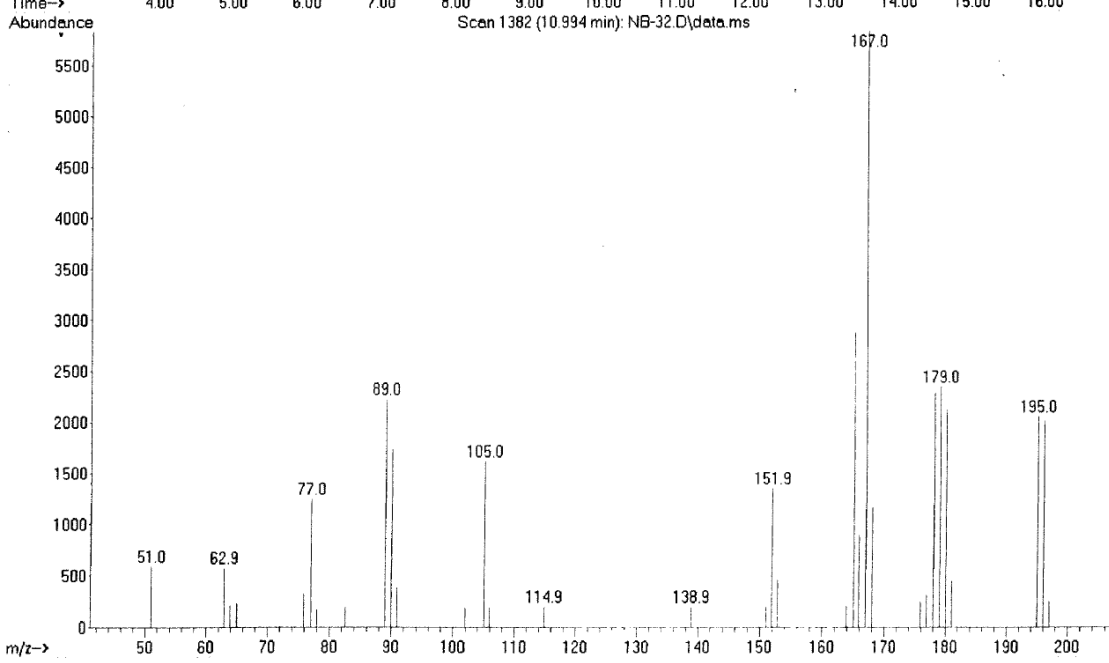

**Entry 11:** Dodecane internal standard,  $R_t = 6.182$  min. *trans*-Stilbene,  $R_t = 10.797$  min.  
*trans*-Stilbene oxide,  $R_t = 10.880$  min.

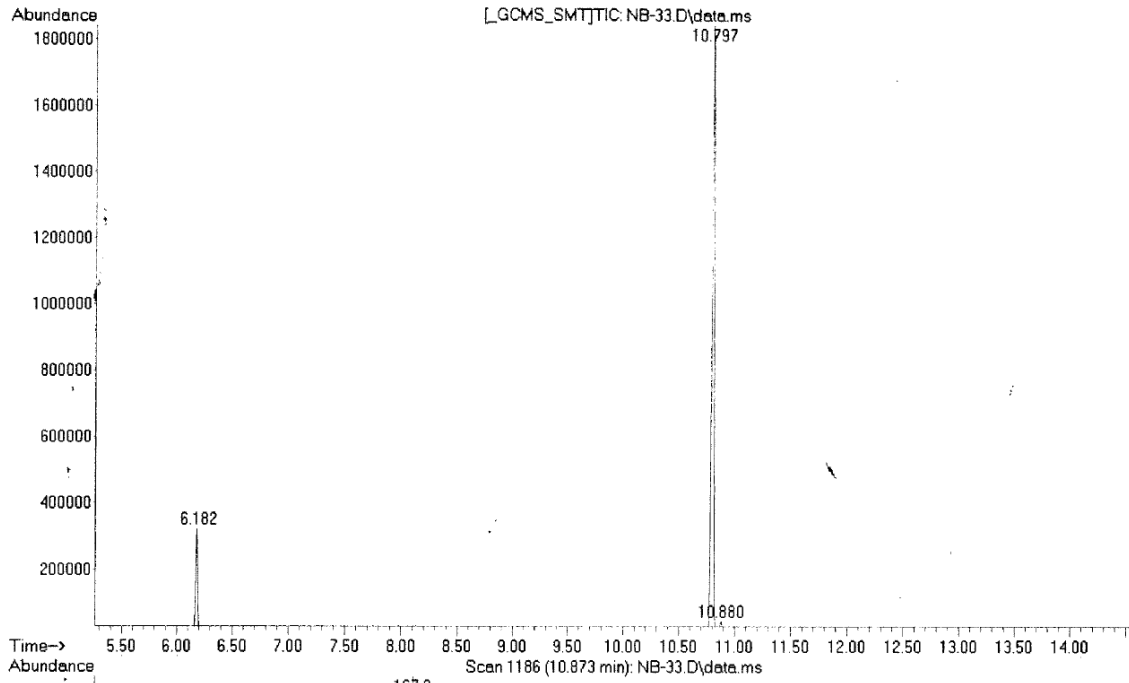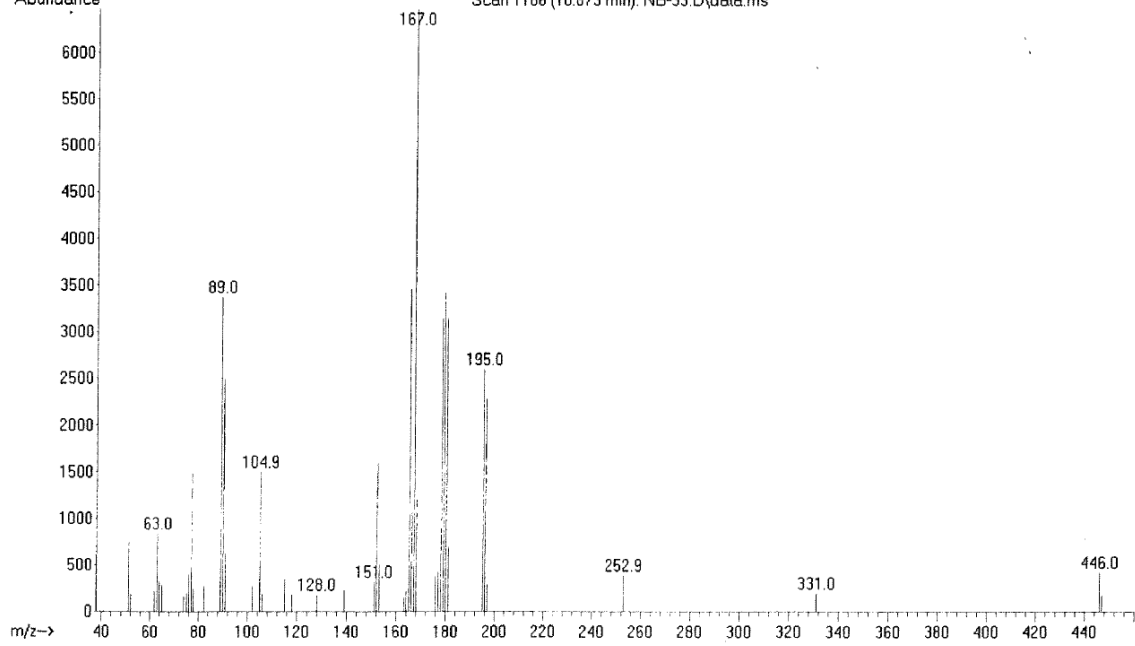

**GC Traces and Mass Spectra of Selected Products Given in Table 3:**

**Entry 1:** Dodecane internal standard,  $R_t = 6.136$  min. *trans*-Stilbene,  $R_t = 10.747$  min. *trans*-Stilbene oxide,  $R_t = 10.835$  min. Isomer of *trans*-Stilbene oxide,  $R_t = 10.443$  min. 1,2-diphenylethane-1,2-diol,  $R_t = 11.461$  min. Other peaks in GC trace have not been identified.

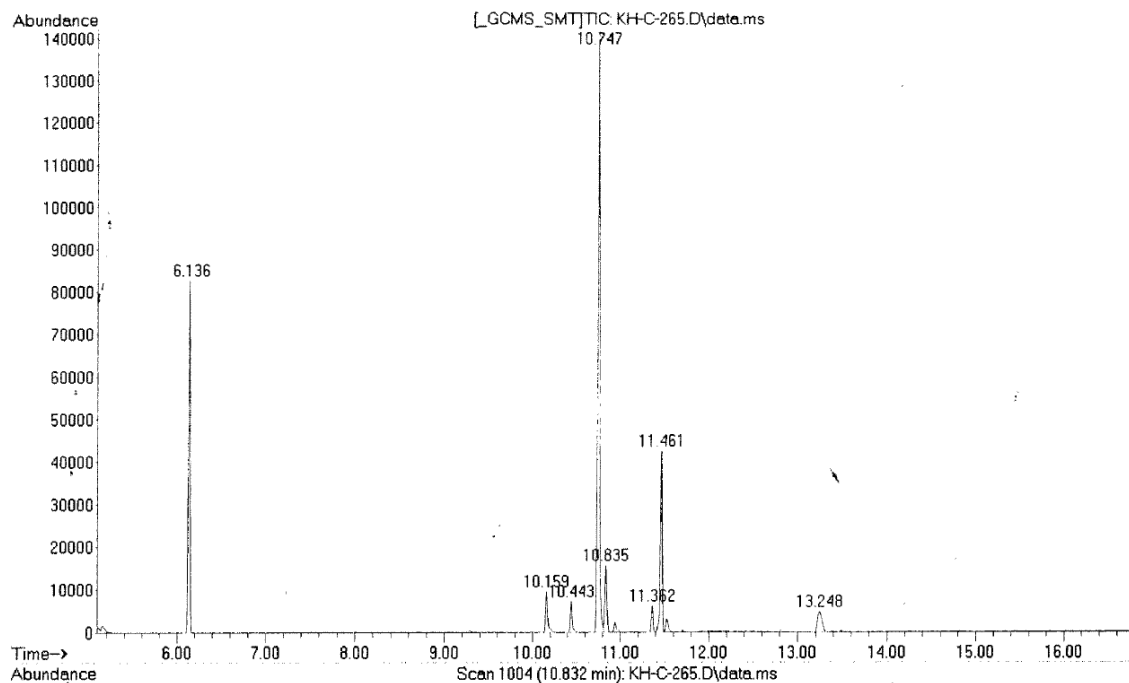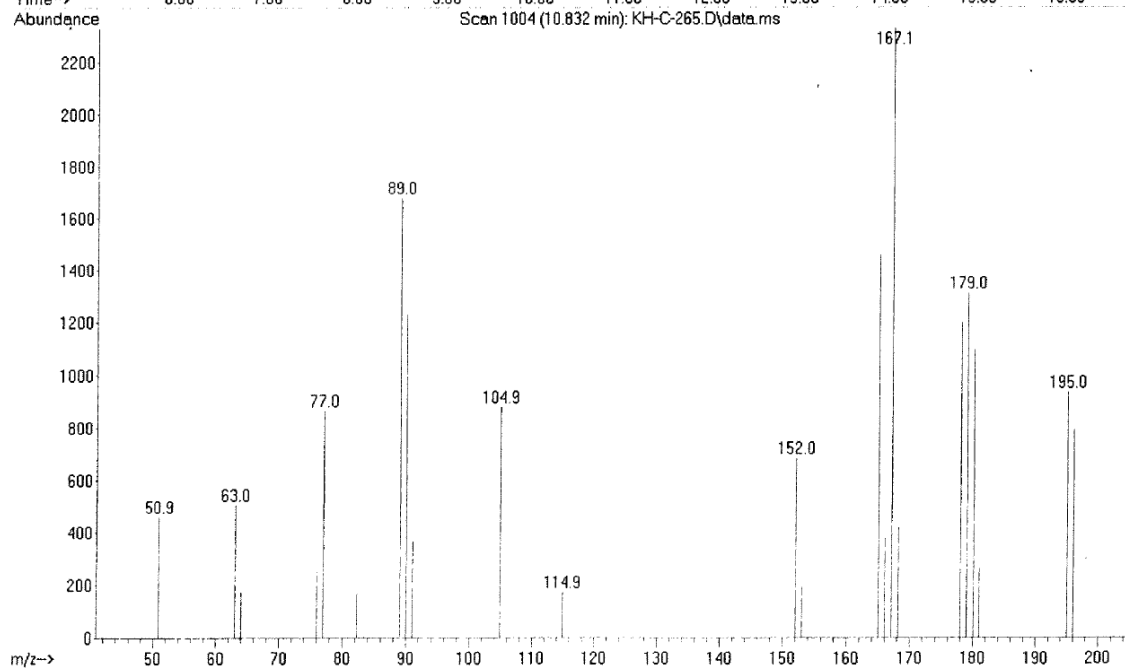

**Entry 2:** Dodecane internal standard,  $R_t = 7.249$  min. *trans*-Stilbene,  $R_t = 10.714$  min.  
By-products: benzaldehyde,  $R_t = 5.210$  min. and 1,2-diphenylethane-1,2-diol,  $R_t = 11.249$  min. Other peaks in GC trace have not been identified.

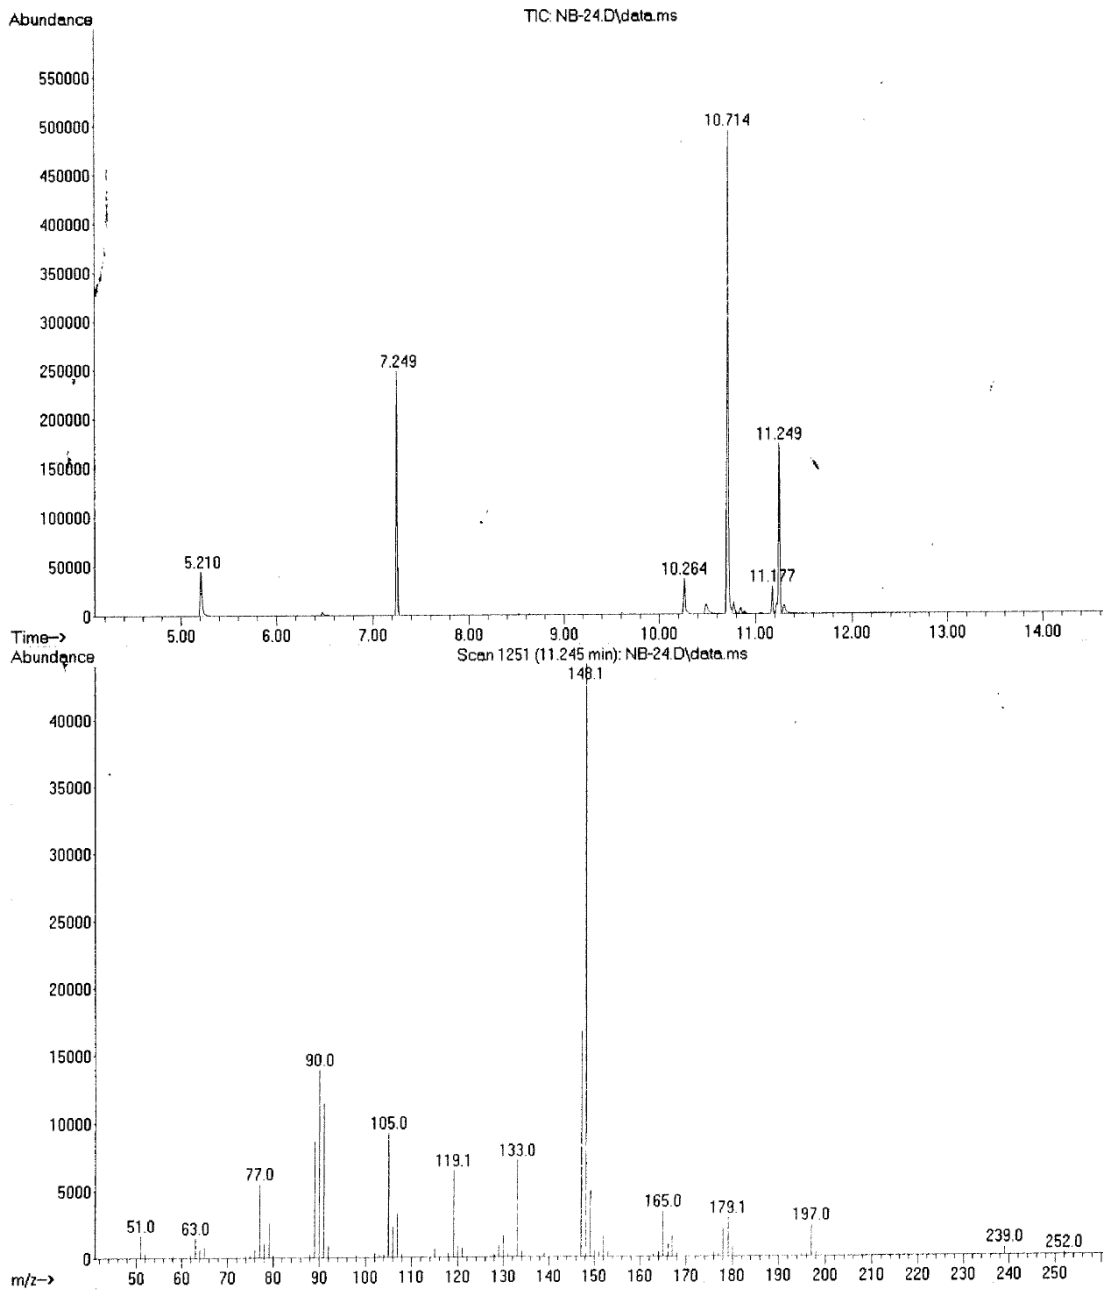

**Entry 3:** Dodecane internal standard,  $R_t = 7.248$  min. *trans*-Stilbene,  $R_t = 10.712$  min. *trans*-Stilbene oxide,  $R_t = 10.773$  min. By-products: benzaldehyde,  $R_t = 5.209$  min. and 1,2-diphenylethane-1,2-diol,  $R_t = 11.248$  min.

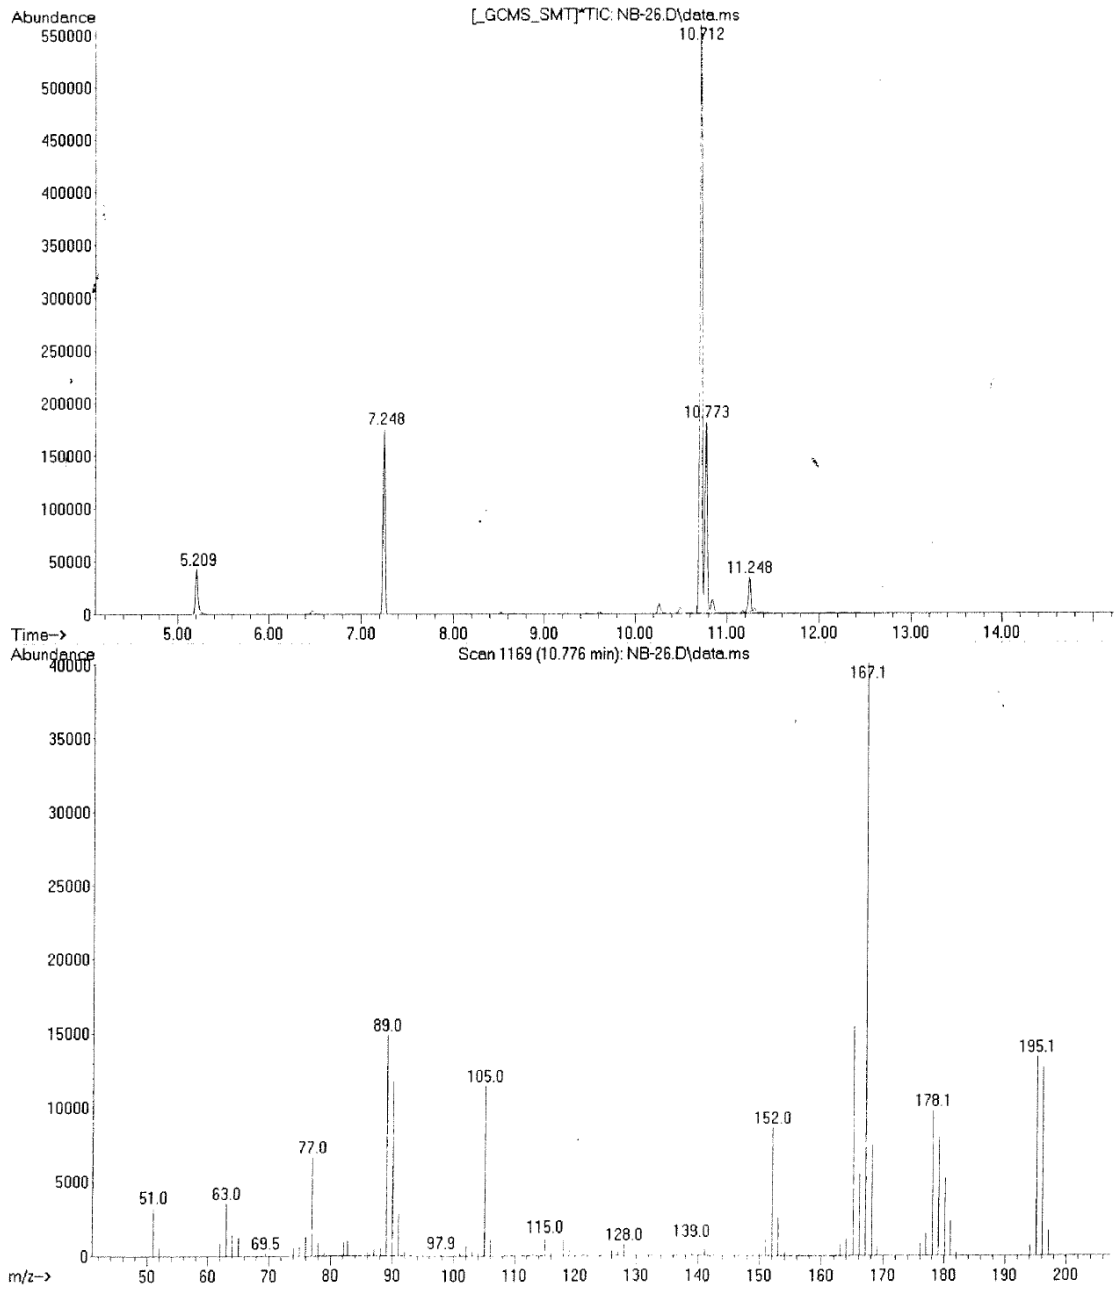

**Entry 4:** Dodecane internal standard,  $R_t = 7.248$  min. *trans*-Stilbene,  $R_t = 10.713$  min. *trans*-Stilbene oxide,  $R_t = 10.774$  min. By-products benzaldehyde,  $R_t = 5.208$  min. and 1,2-diphenylethane-1,2-diol,  $R_t = 11.250$  min.

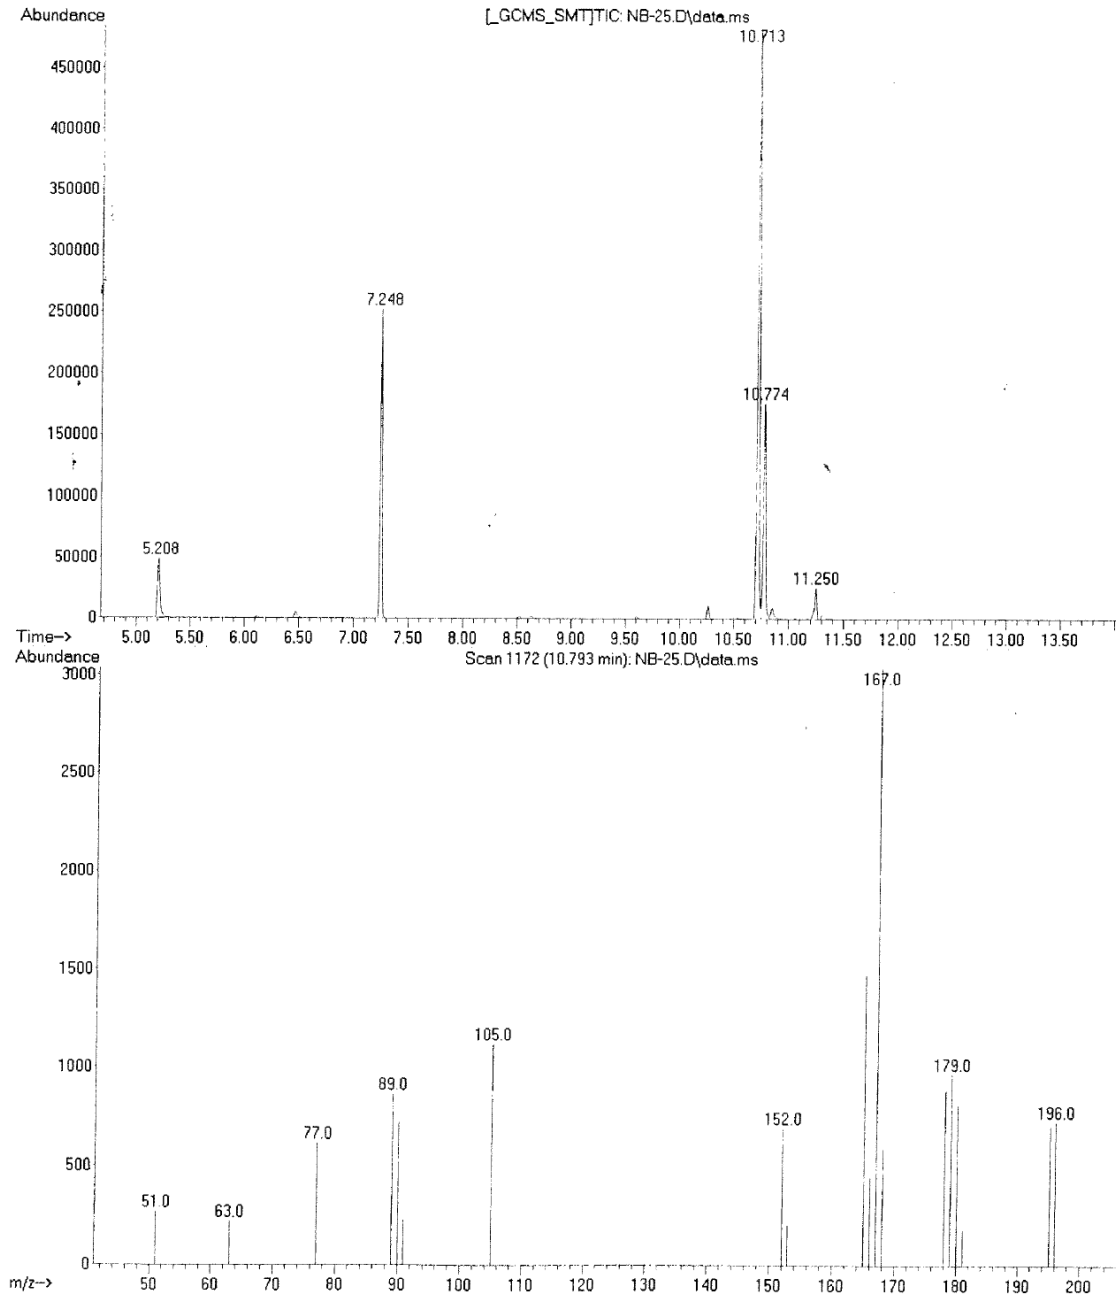



**Entry 5: See Table 2, Entry 1.**

**Entry 6:** Dodecane internal standard,  $R_t = 6.135$  min. *trans*-Stilbene,  $R_t = 10.737$  min. *trans*-Stilbene oxide,  $R_t = 10.819$  min.

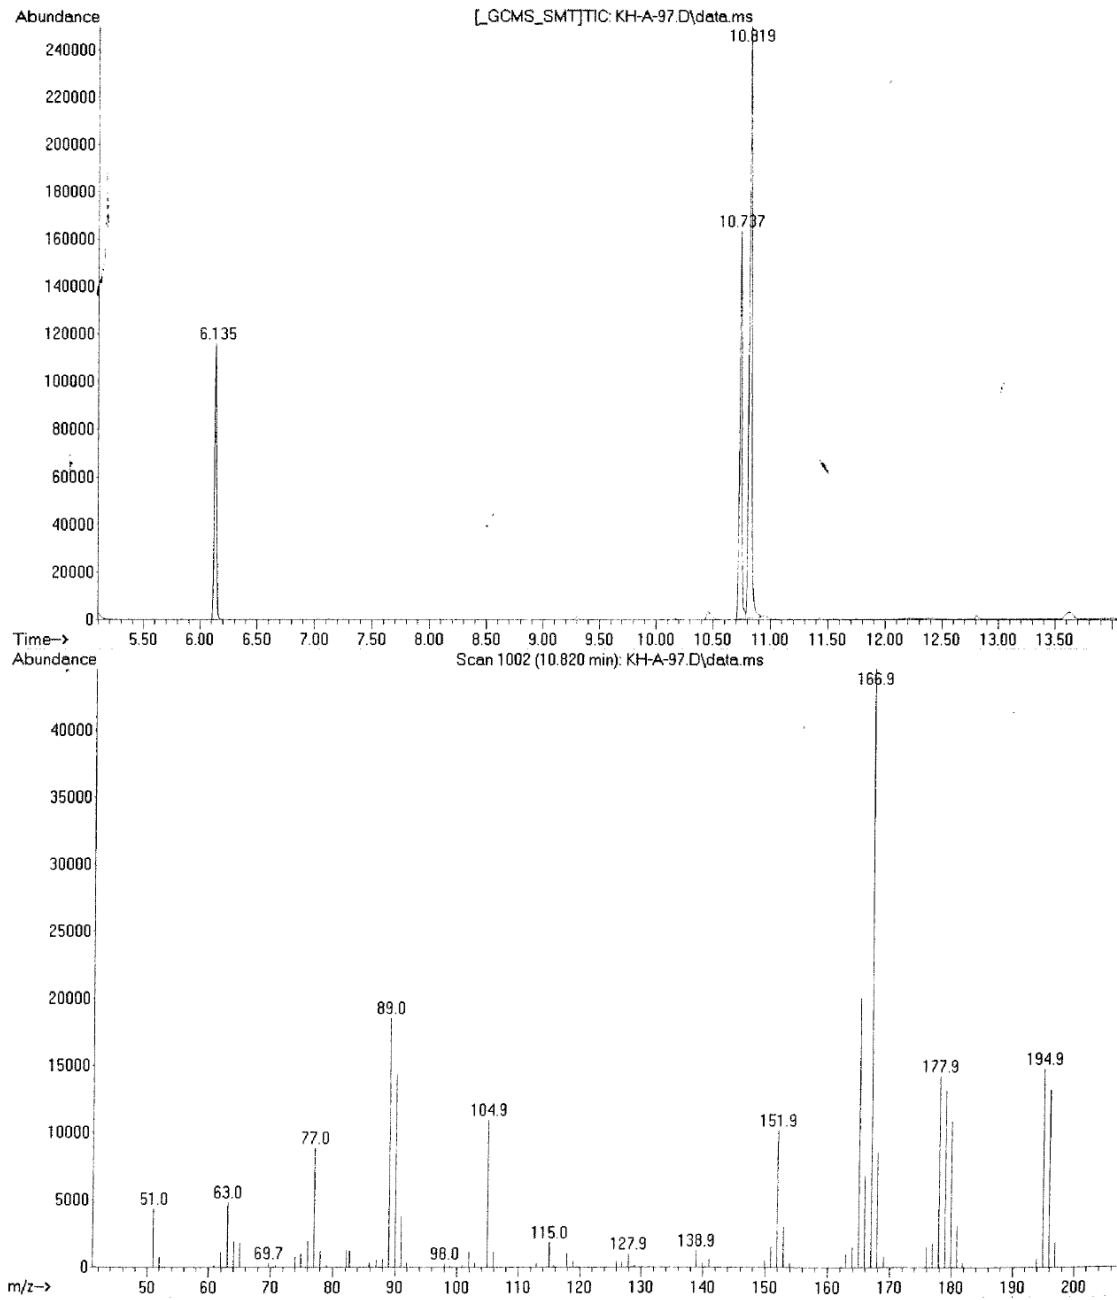

**Entry 6 (using 3.0 mmol H<sub>2</sub>O<sub>2</sub>, condition c in Table 3 footnote):** Dodecane internal standard, R<sub>t</sub> = 7.208 min. *trans*-Stilbene oxide, R<sub>t</sub> = 12.121 min. By-product benzaldehyde, R<sub>t</sub> = 5.174 min.

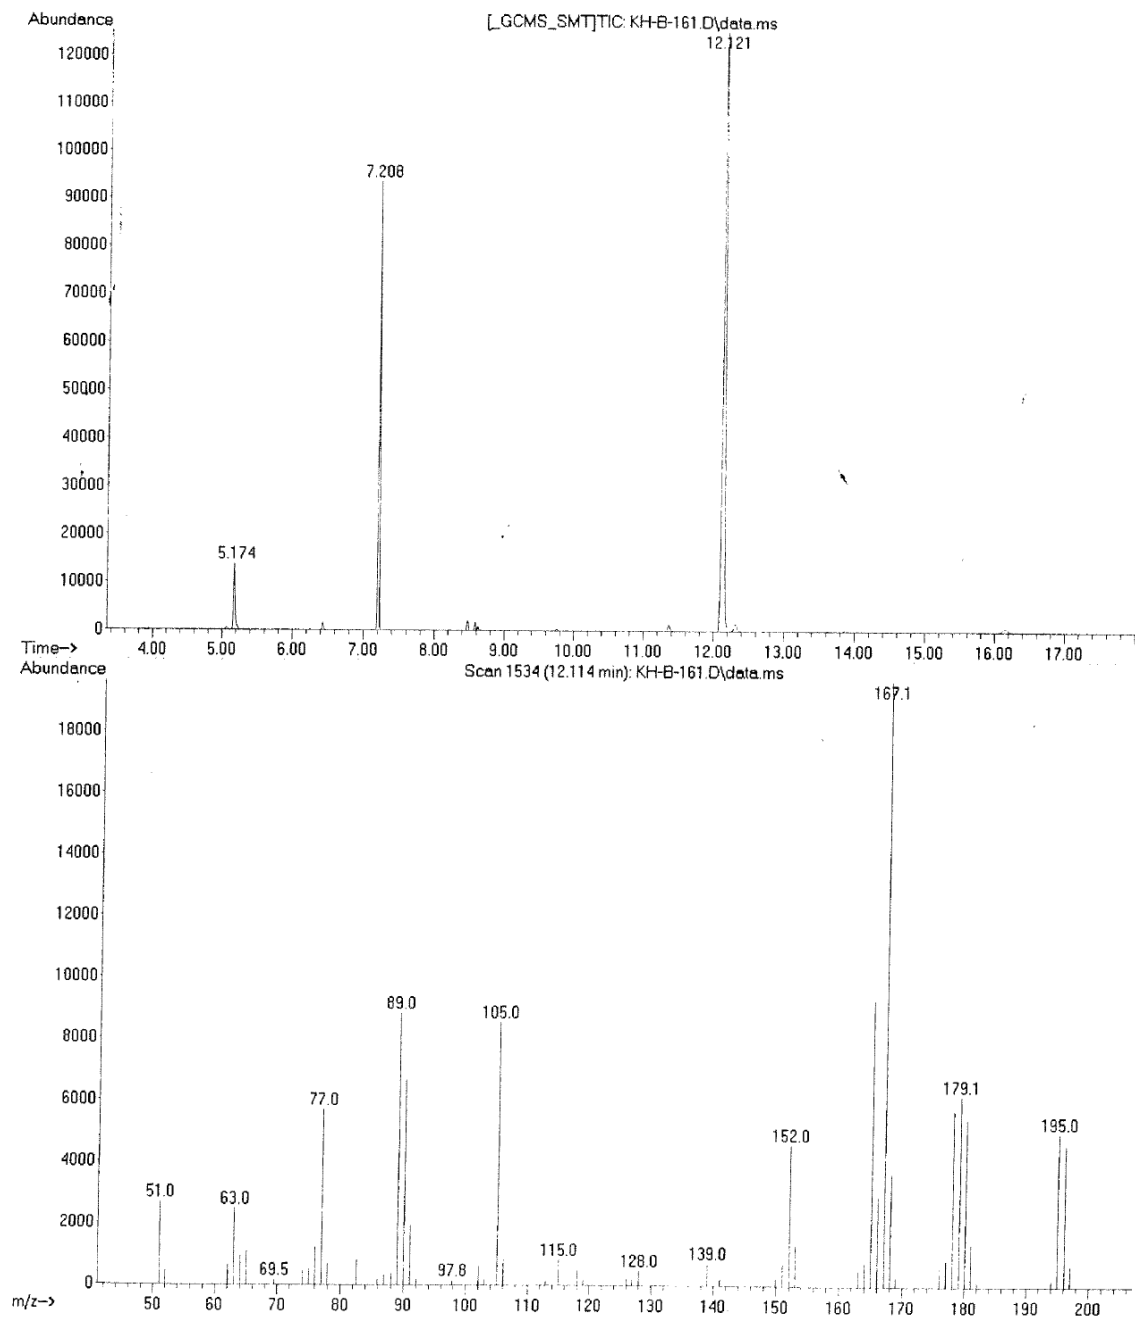

**Entry 7:** Dodecane internal standard,  $R_t = 6.137$  min. *trans*-stilbene,  $R_t = 10.741$  min.  
*trans*-Stilbene oxide,  $R_t = 10.824$  min.

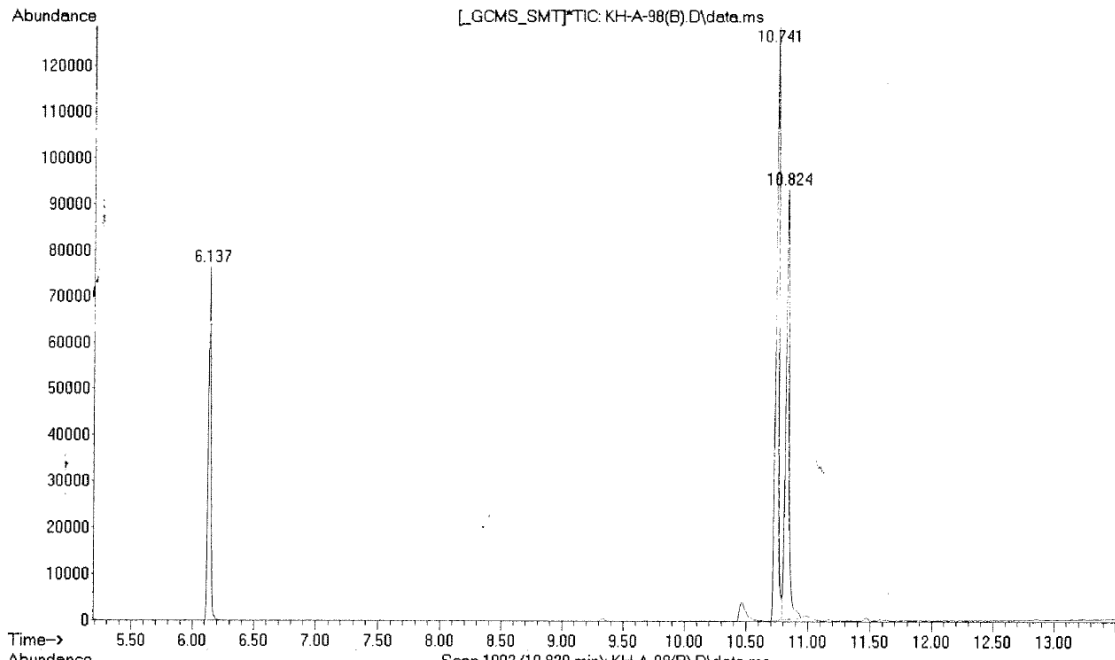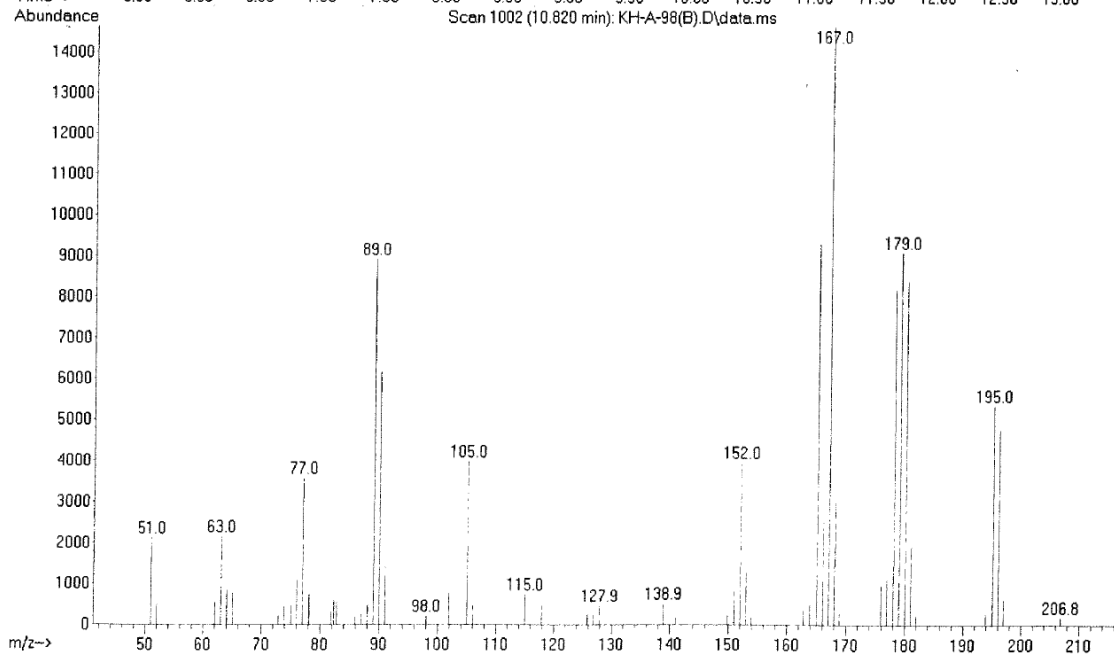

**Entry 7 (using 3.0 mmol H<sub>2</sub>O<sub>2</sub>, condition c in Table 3 footnote):** Dodecane internal standard, R<sub>t</sub> = 7.208 min. *trans*-Stilbene oxide, R<sub>t</sub> = 12.120 min. By-product benzaldehyde, R<sub>t</sub> = 5.173 min.

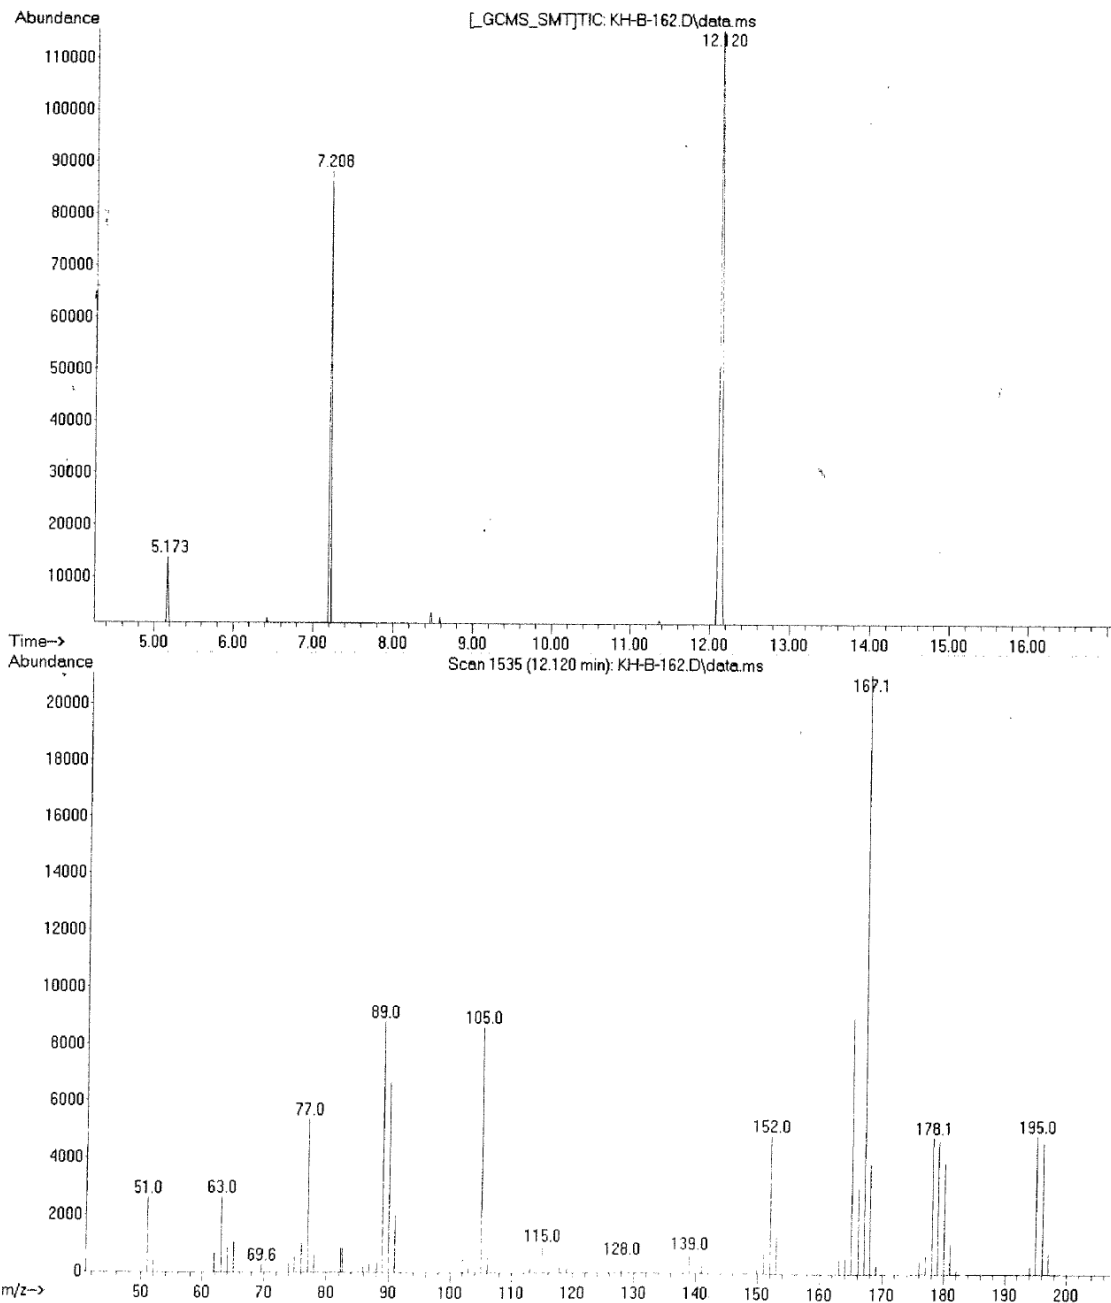

**Entry 8:** Dodecane internal standard,  $R_t = 6.182$  min. *trans*-stilbene,  $R_t = 10.794$  min.  
*trans*-Stilbene oxide,  $R_t = 10.879$  min.

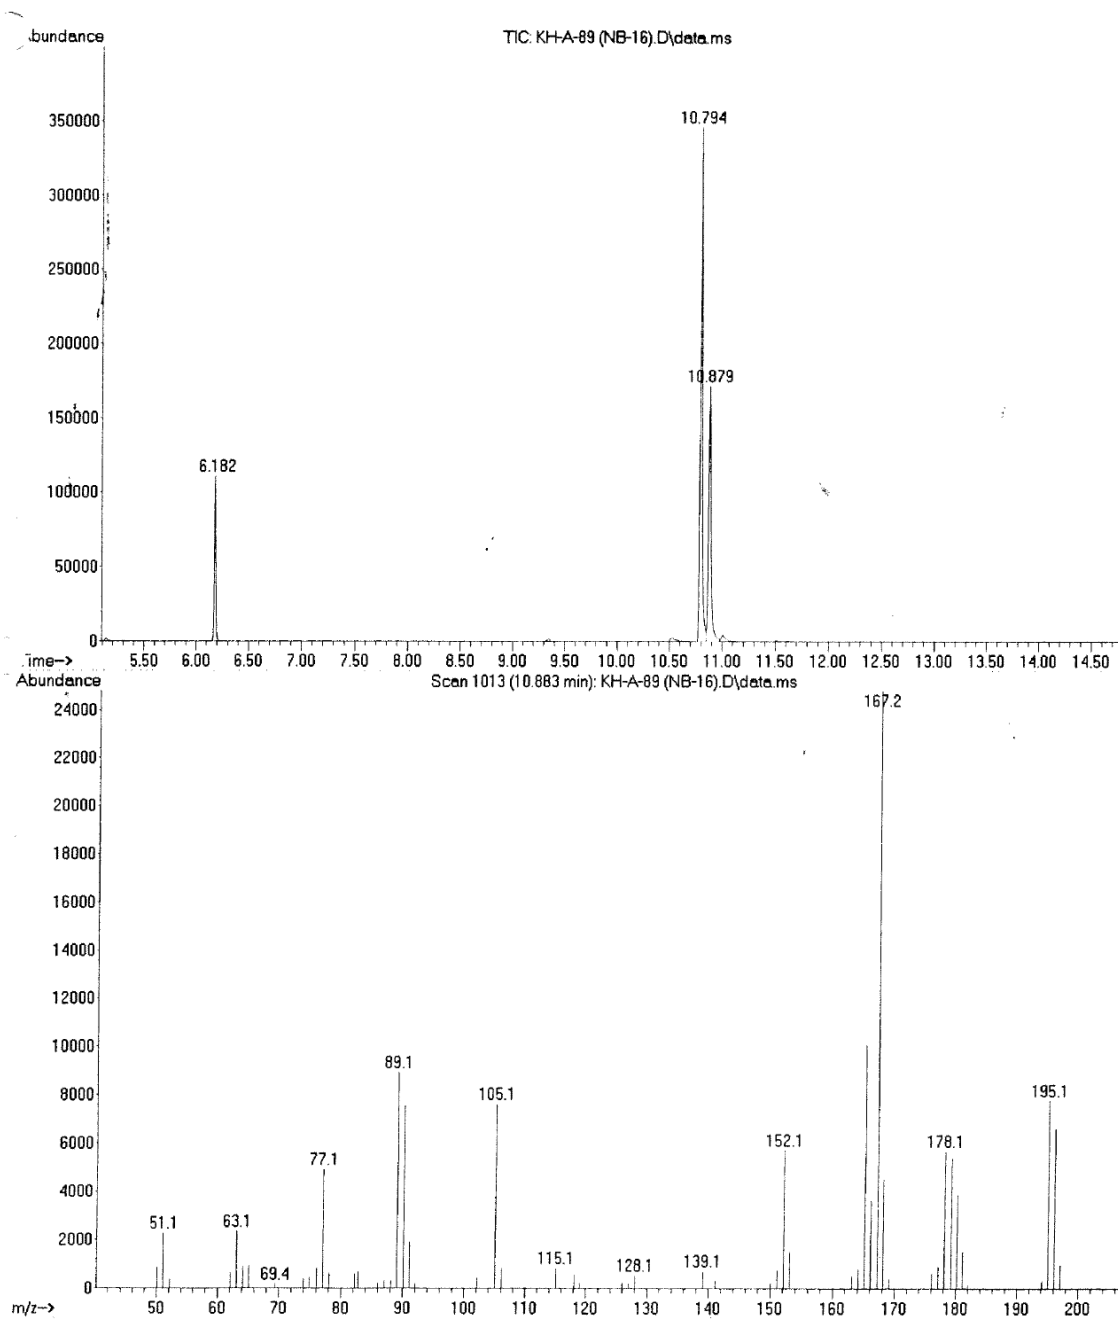

**GC Traces and Mass Spectra of Selected Products Given in Table 4:**

**Entry 1:** Dodecane internal standard,  $R_t = 6.136$  min. *trans*-Stilbene oxide,  $R_t = 10.824$  min.

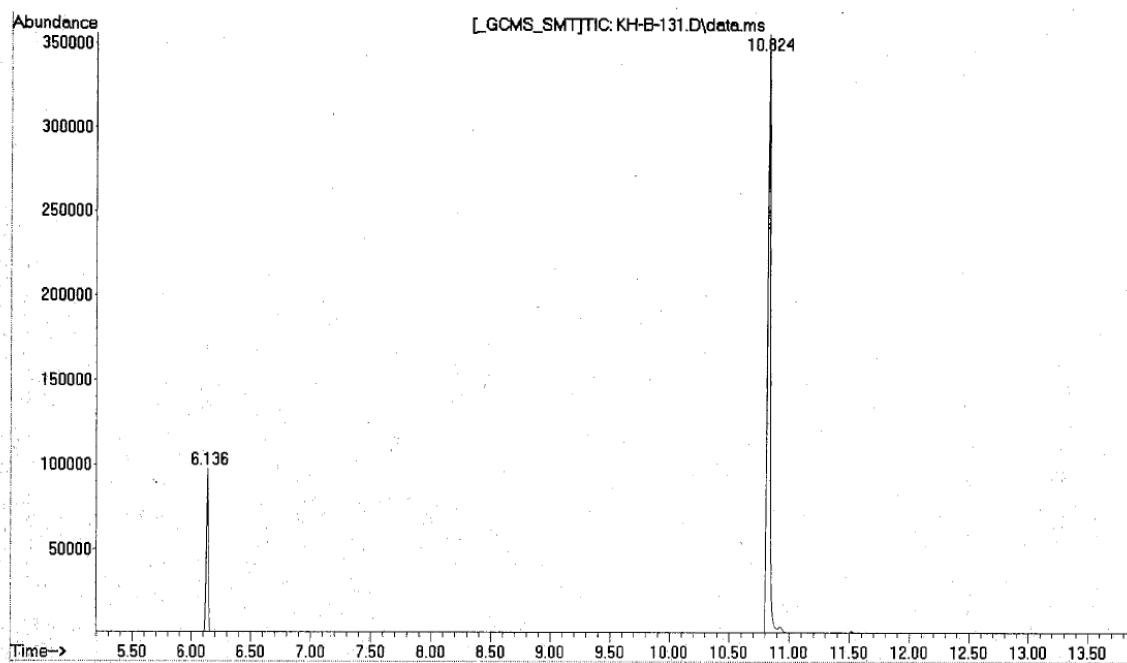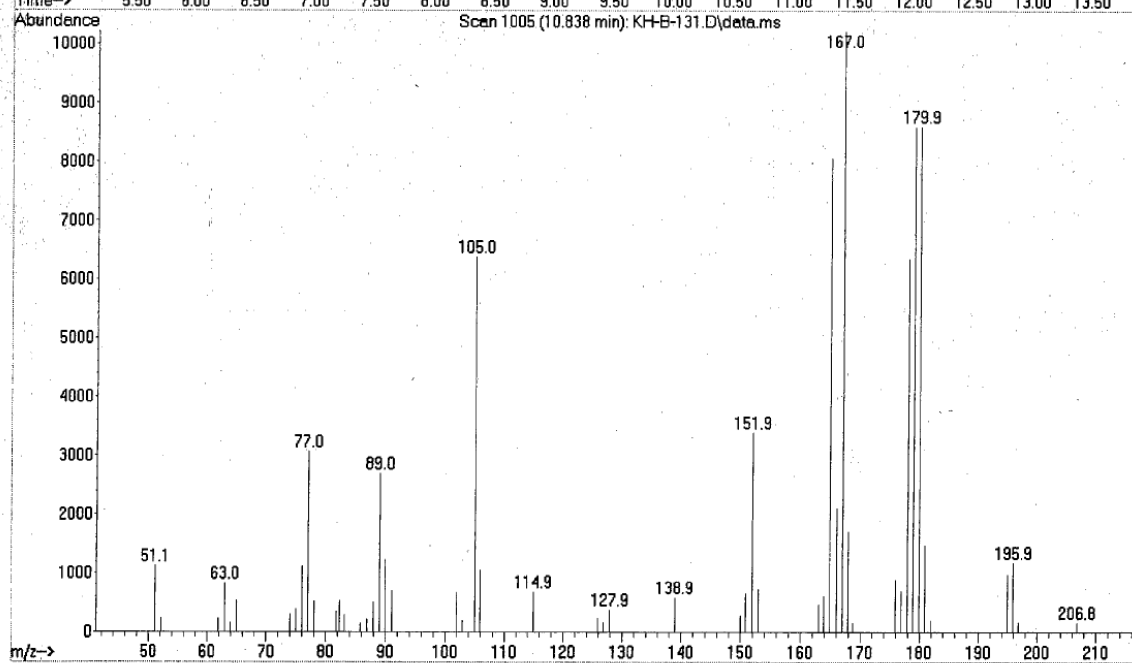

**Entry 2:** Dodecane internal standard ,  $R_t = 6.139$  min. *cis*-Stilbene ,  $R_t = 9.282$  min.  
*trans*-Stilbene oxide,  $R_t = 10.825$  min.

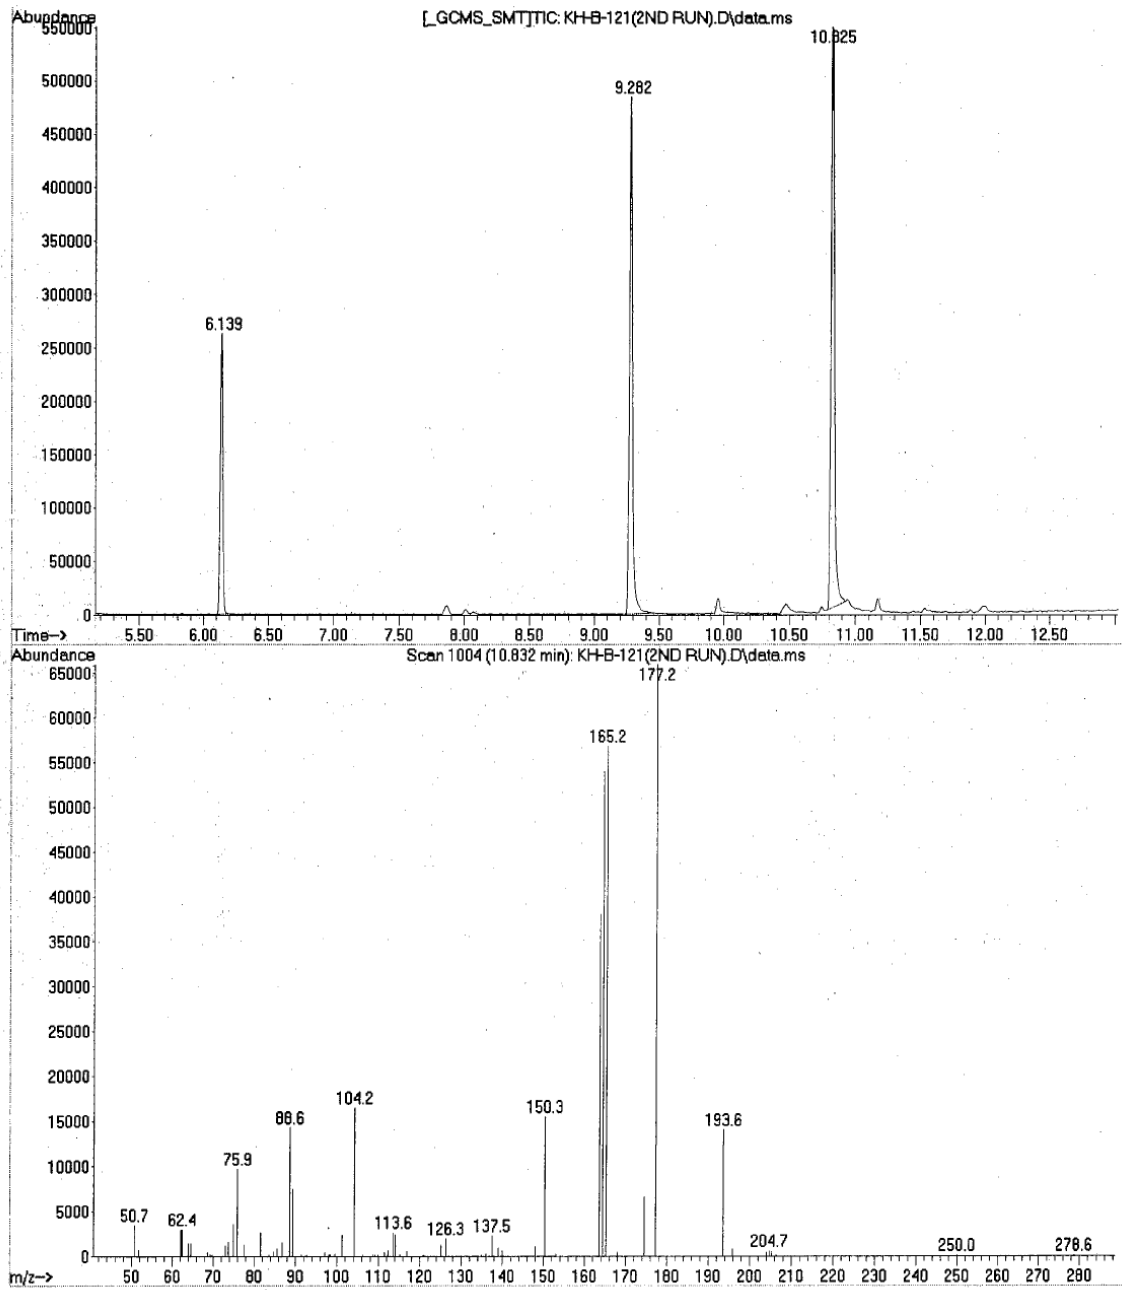

**Entry 2 (after heating to 62 °C for 48 h, condition *b* in Table 4 footnote):** Dodecane internal standard,  $R_t = 5.606$  min. *cis*-Stilbene,  $R_t = 8.076$  min. Isomer of *trans*-Stilbene oxide,  $R_t = 8.952$  min. *trans*-Stilbene oxide (confirmed by  $^1\text{H}$  NMR),  $R_t = 9.233$  min. Unidentified by-product  $R_t = 9.358$  min.

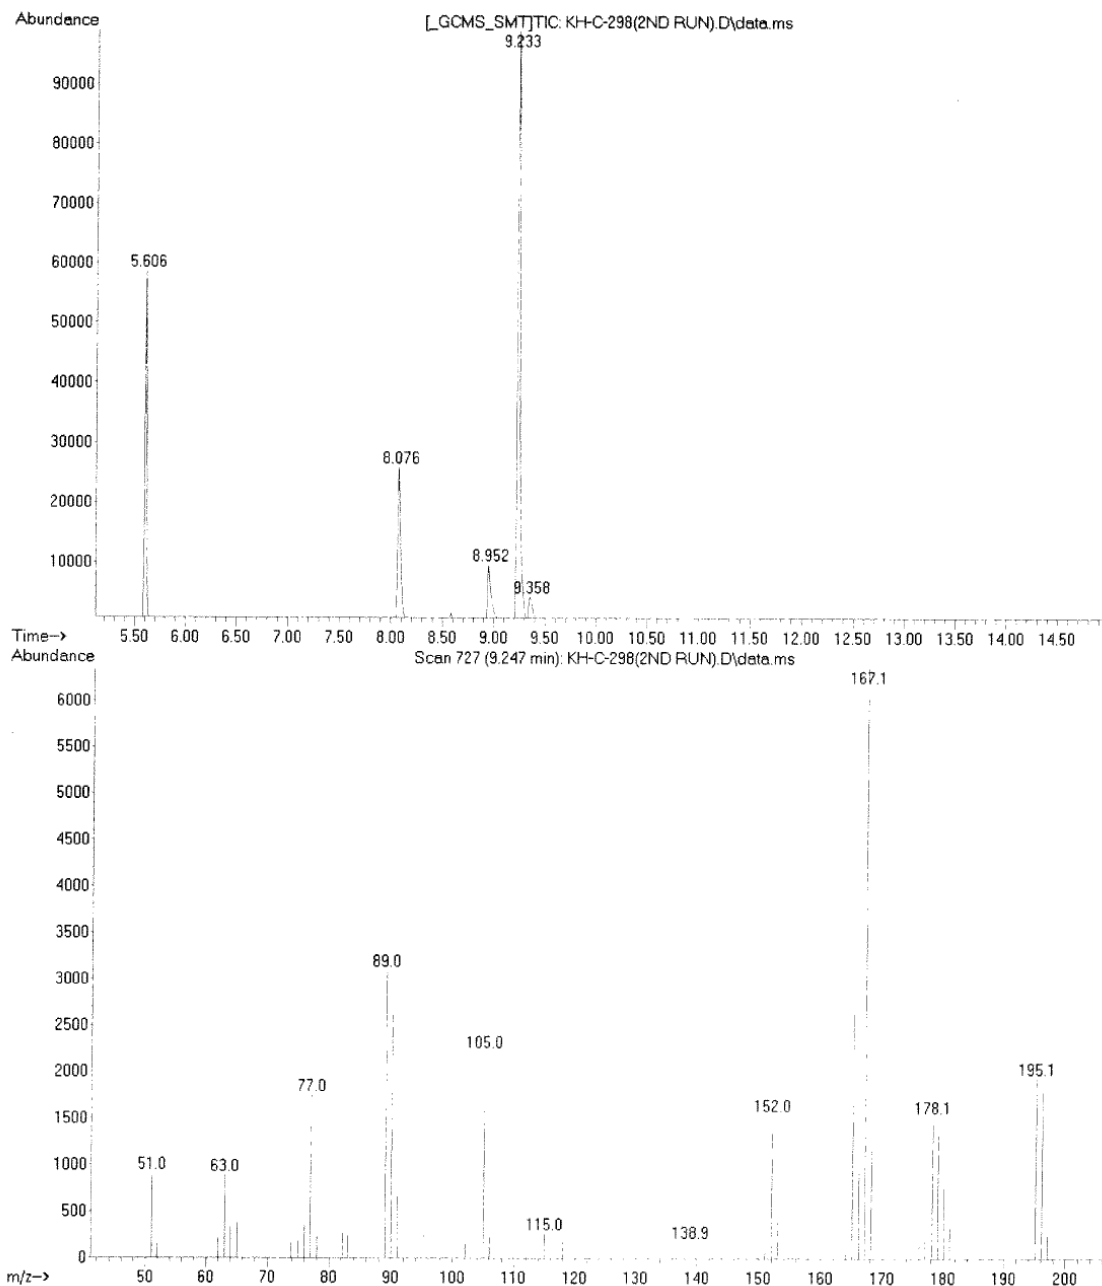



**Entry 3:** Impurity of substrate,  $R_t = 5.178$  min. *trans*- $\beta$ -methyl styrene oxide,  $R_t = 6.598$  min. Dodecane internal standard,  $R_t = 7.207$  min. Unidentified by products,  $R_t = 7.648$  and 8.460 min.

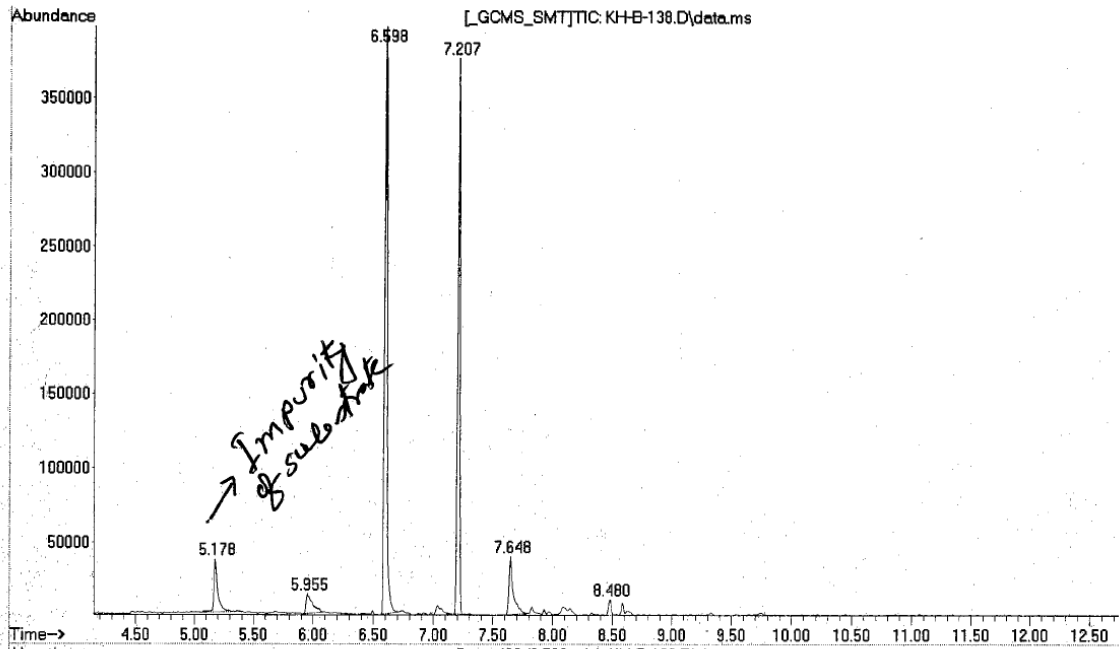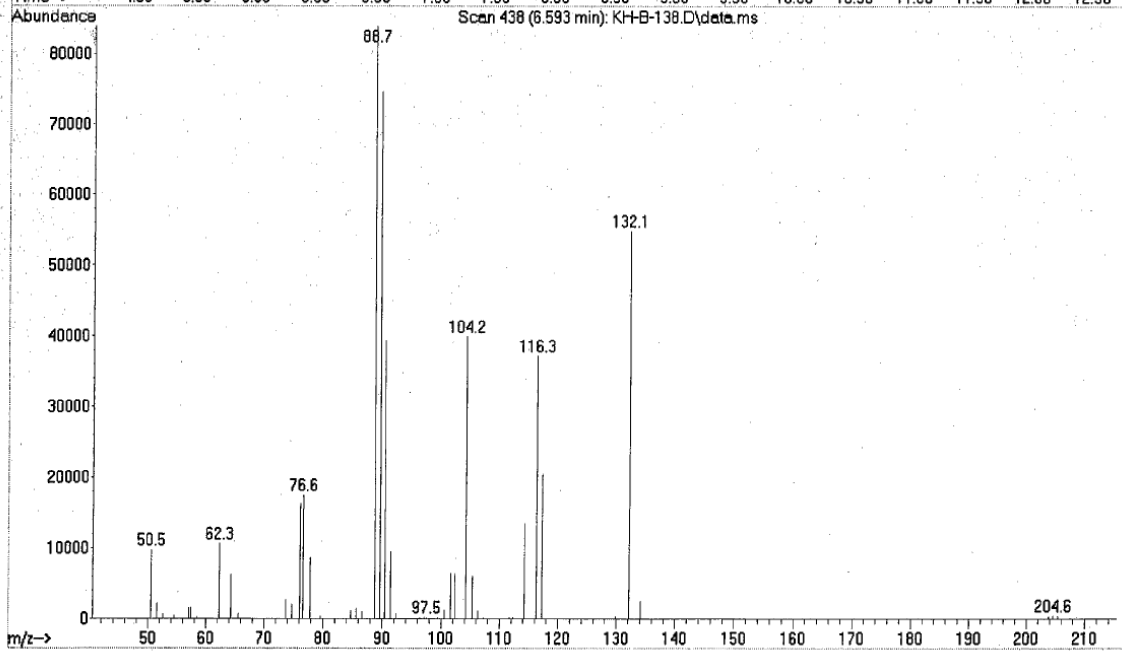

**Entry 4 :** Dodecane internal standard,  $R_t = 6.139$  min. *trans*- $\alpha$ -Methylstilbene oxide,  $R_t = 10.672$  min. Isomer of *trans*- $\alpha$ -methylstilbene oxide  $R_t = 9.760$  min. *trans*- $\alpha$ -Methylstilbene:  $R_t = 10.757$  min.

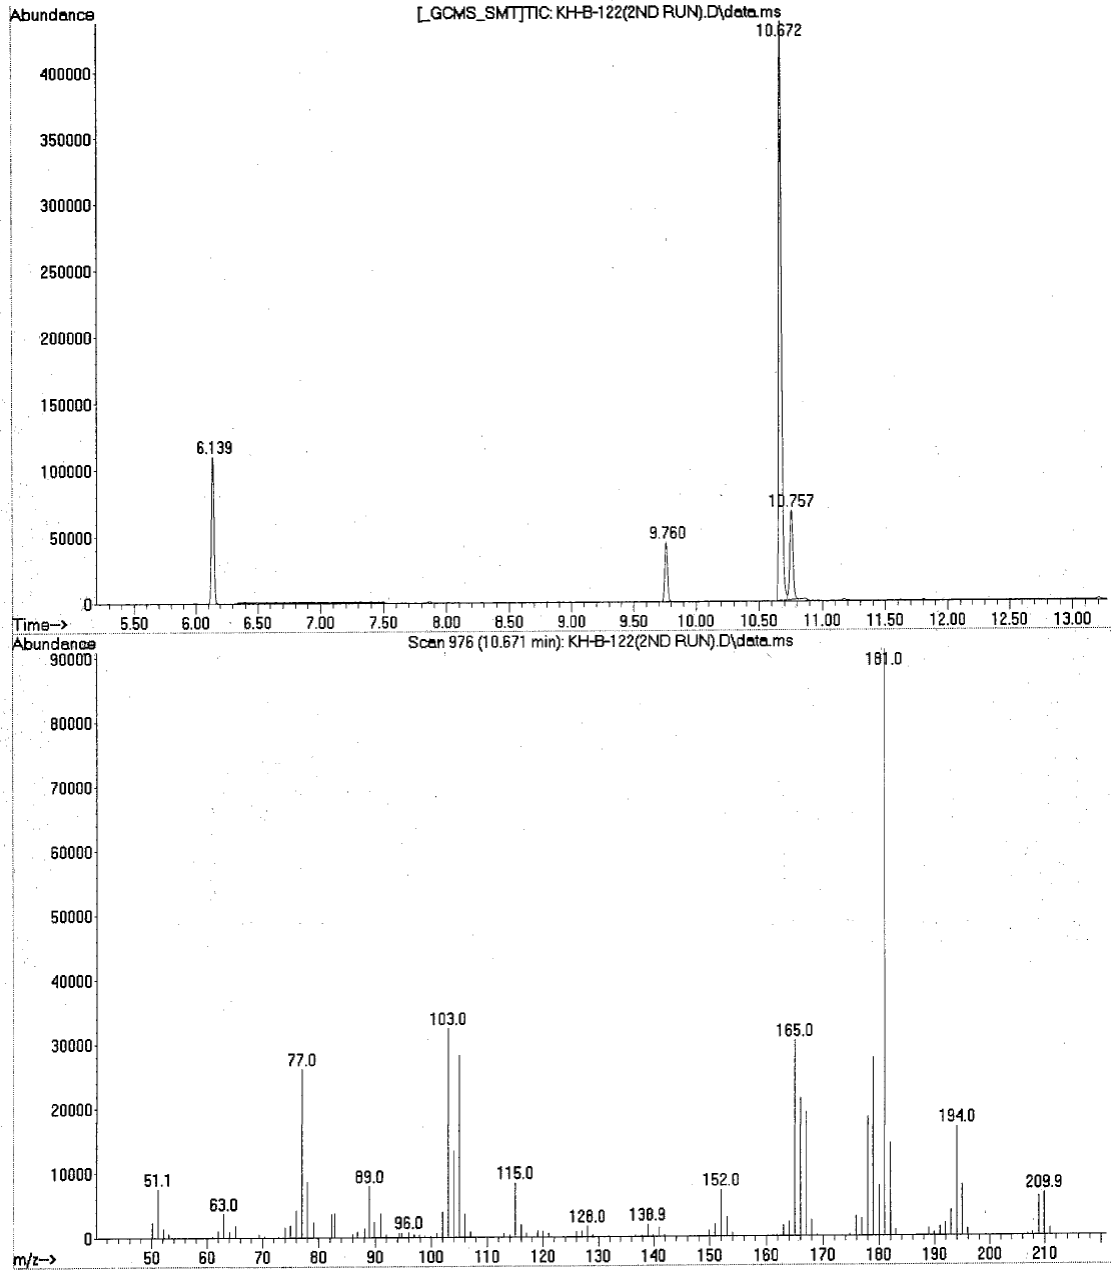

**Entry 5:** Dodecane internal standard,  $R_t = 7.209$  min. 1-phenyl-1-cyclohexene oxide,  $R_t = 9.121$  min. Impurity of substrate,  $R_t = 8.641$  min.

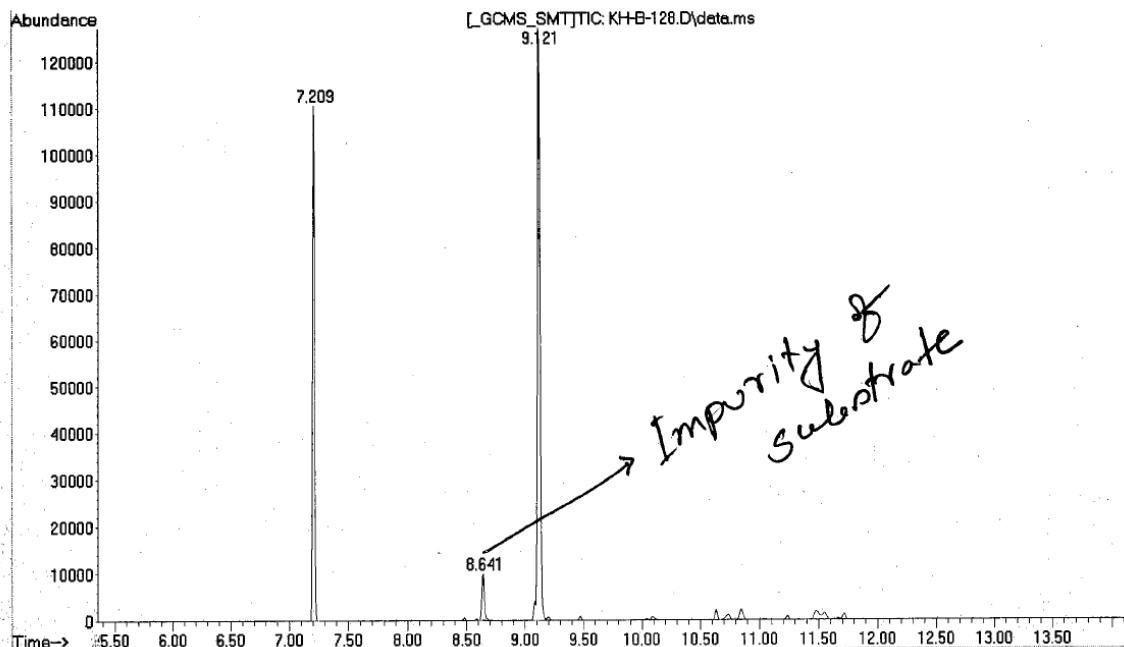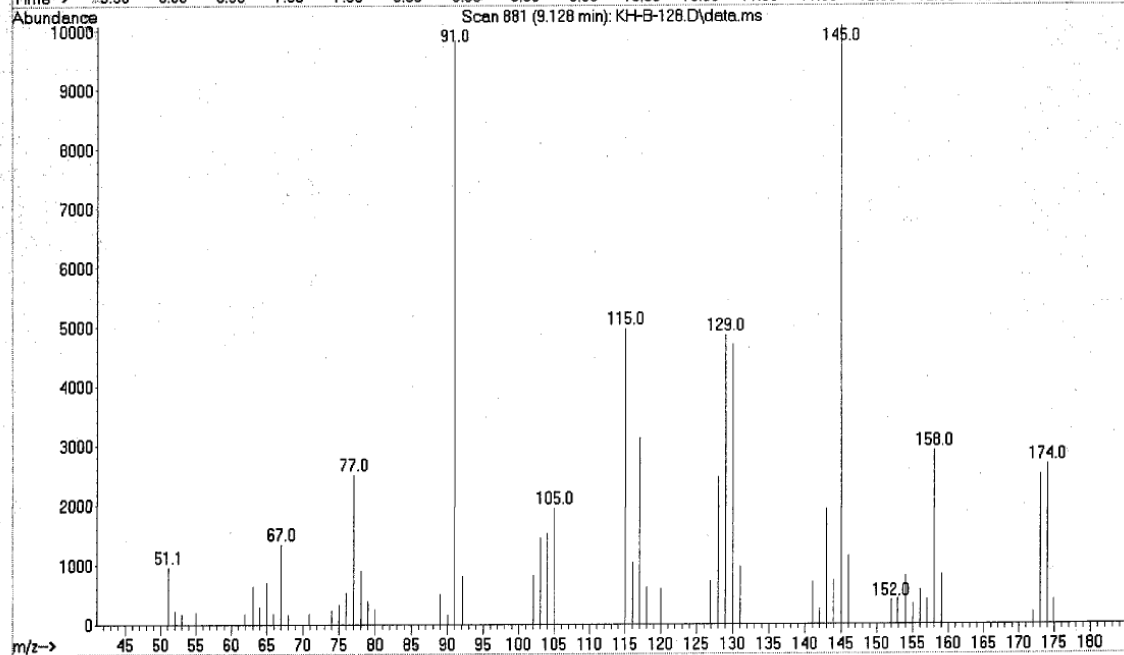

**Entry 6.** 2-Chlorostyrene,  $R_t = 6.657$  min. Dodecane internal standard,  $R_t = 7.210$  min. 1-(2-chlorophenyl) ethane,  $R_t = 7.265$  min. 2-chlorostyrene oxide,  $R_t = 7.354$  min. 1-(2-chlorophenyl) ethanol,  $R_t = 7.556$  min.

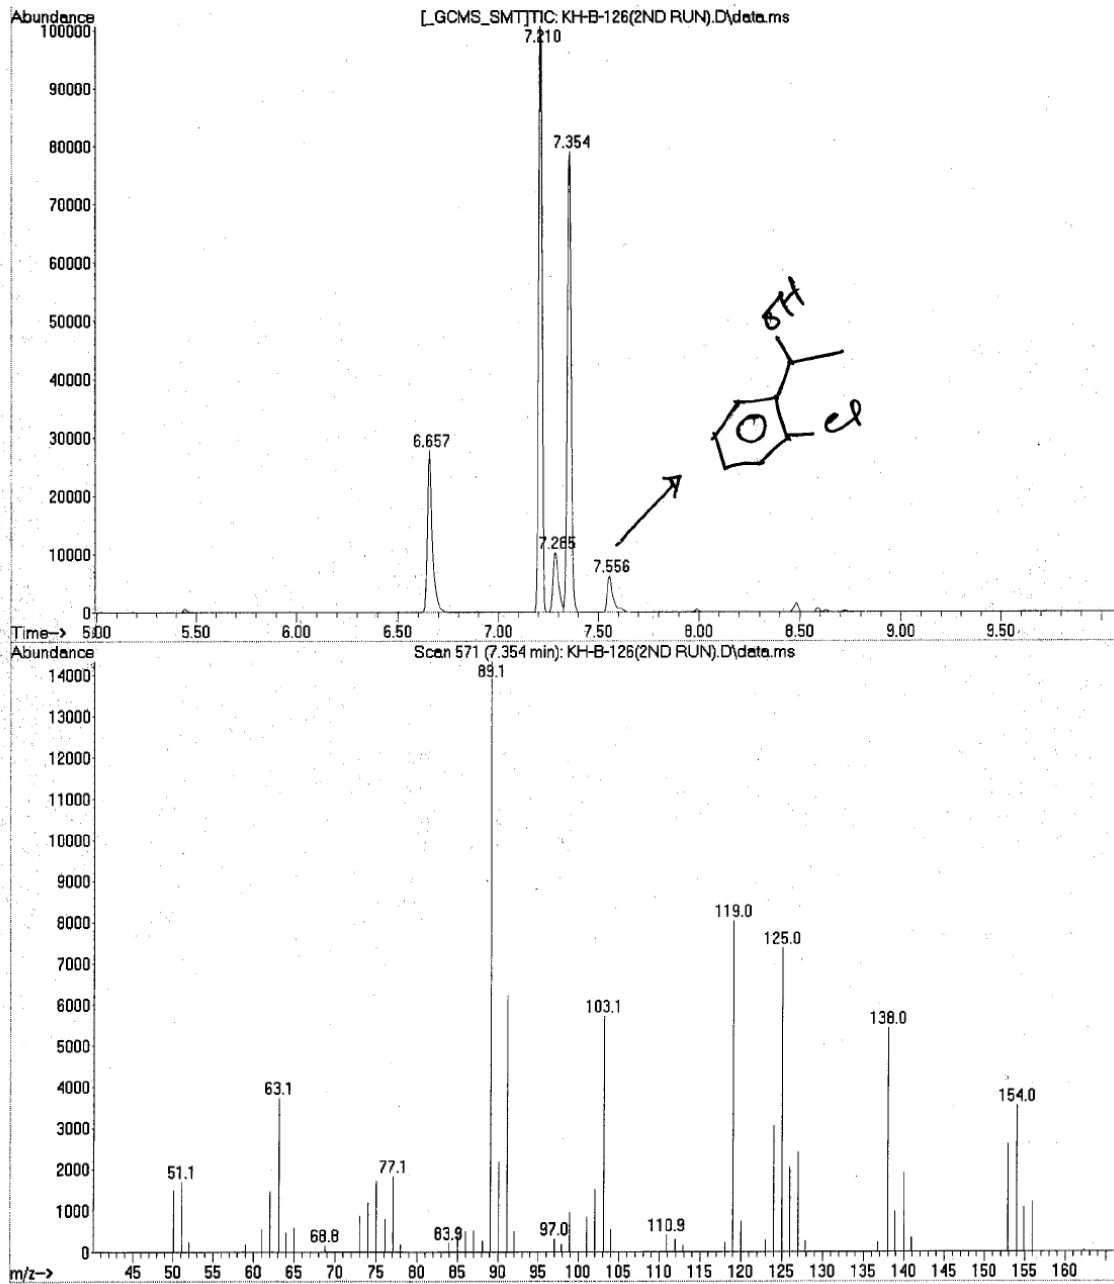

**Entry 7:** 4-Chlorostyrene,  $R_t = 6.738$  min. Dodecane internal standard,  $R_t = 7.210$  min. 1-(4-chlorophenyl) ethanone,  $R_t = 7.578$  min. 4-chlorostyrene oxide,  $R_t = 7.632$  and  $7.711$  min. Confirmed against standard 4-chlorostyrene oxide  $R_t = 7.632$  and  $7.711$  min.

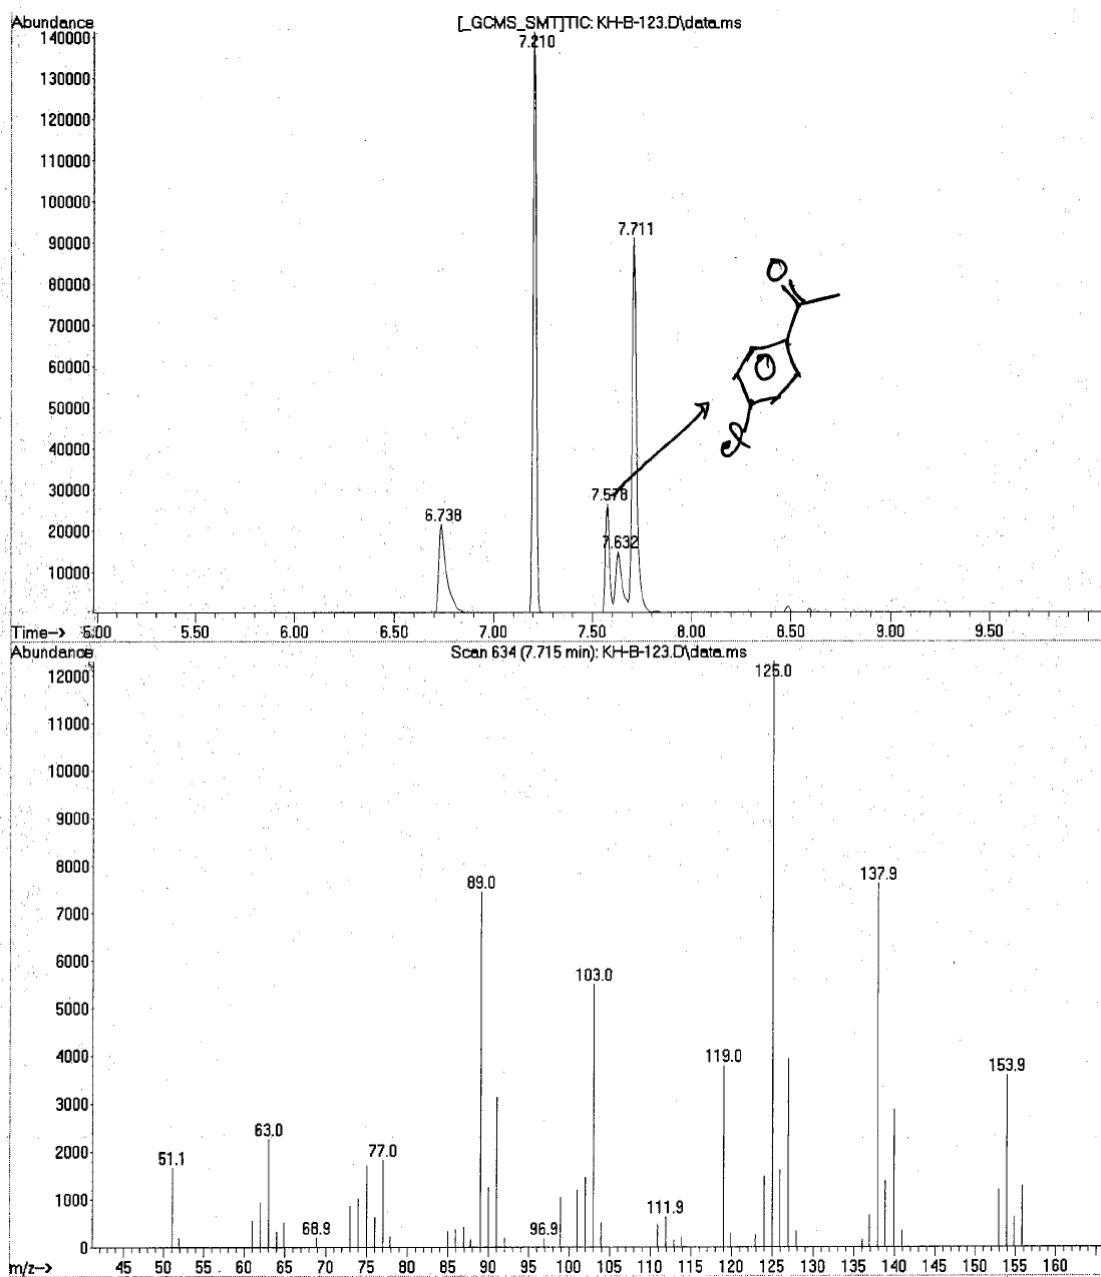

**Entry 8:** Dodecane internal standard,  $R_t = 7.209$  min. 4-Bromostyrene,  $R_t = 7.468$  min. 1-(4-bromophenyl) ethanone,  $R_t = 8.260$  min. 4-bromostyrene oxide,  $R_t = 8.312$  and  $8.392$  min. Confirmed against standard 4-bromostyrene oxide:  $R_t = 8.312$  and  $8.392$  min.

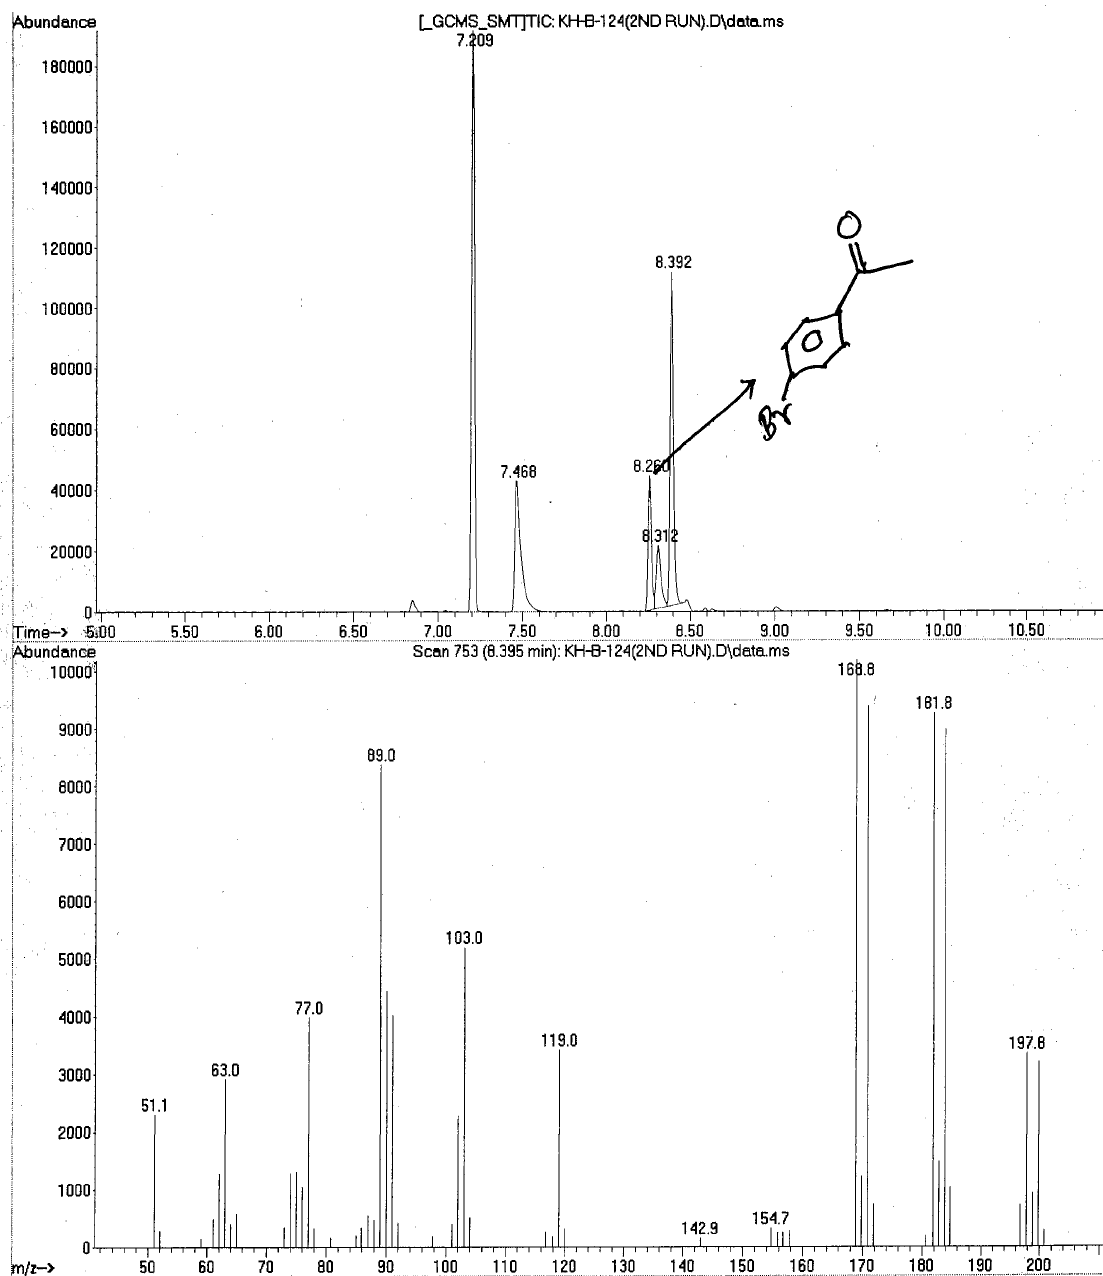

**Entry 9:** Dodecane internal standard,  $R_t = 7.208$  min. *trans,trans,cis*-1,5,9-cyclododecatriene,  $R_t = 8.090$  min. 13-oxo-bicyclo[10.1.0]trideca-4,8-diene,  $R_t = 9.614$  min. Epoxide product also characterized by  $^1\text{H}$  NMR.

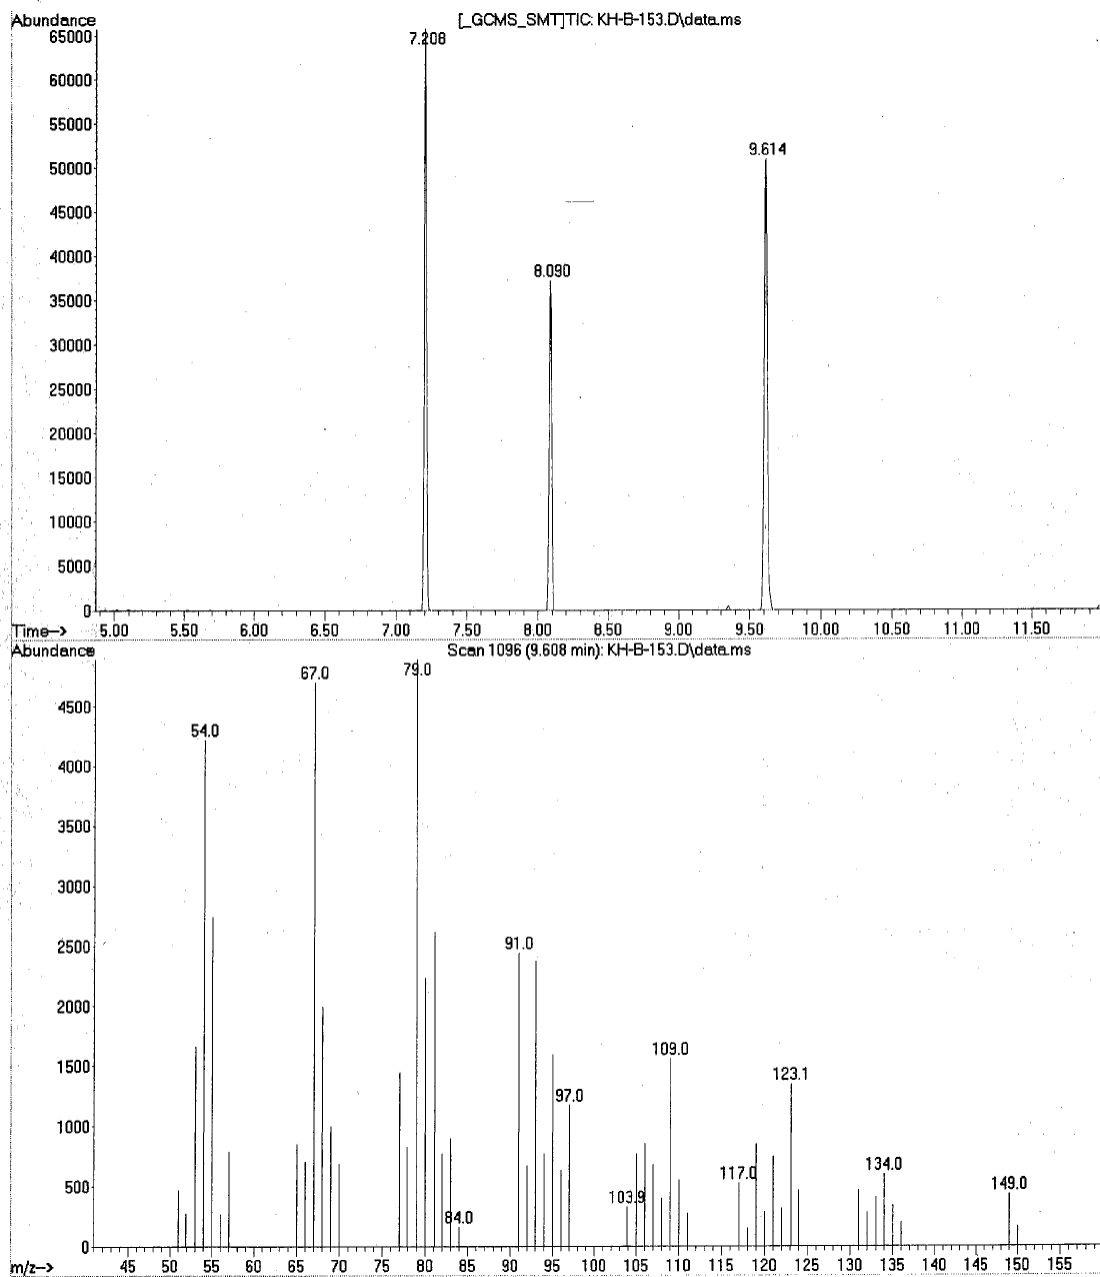

**Entry 10:** *cis*-Cyclooctene,  $R_t = 4.526$  min. *cis*-Cyclooctene oxide,  $R_t = 6.539$  min. Dodecane internal standard,  $R_t = 7.207$  min. By product 8-chlorocyclooctene,  $R_t = 8.426$  min. Epoxide product also characterized by  $^1\text{H}$  NMR.

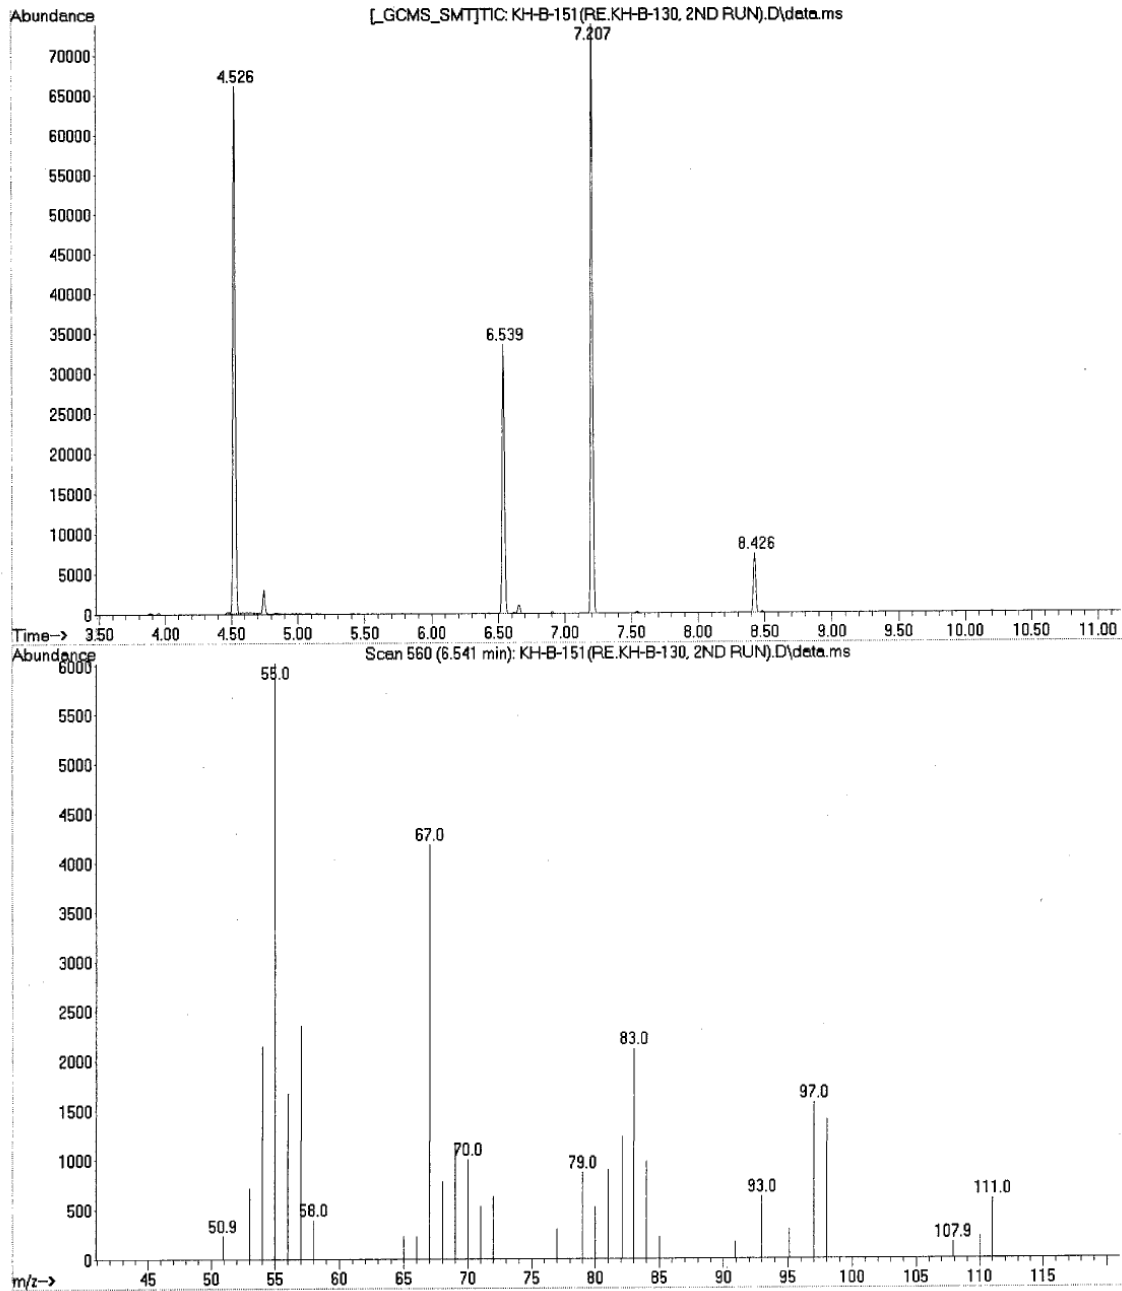



**Entry 11:** 1,3-cyclooctadiene oxide,  $R_t = 6.363$  min. Dodecane internal standard,  $R_t = 7.207$  min.

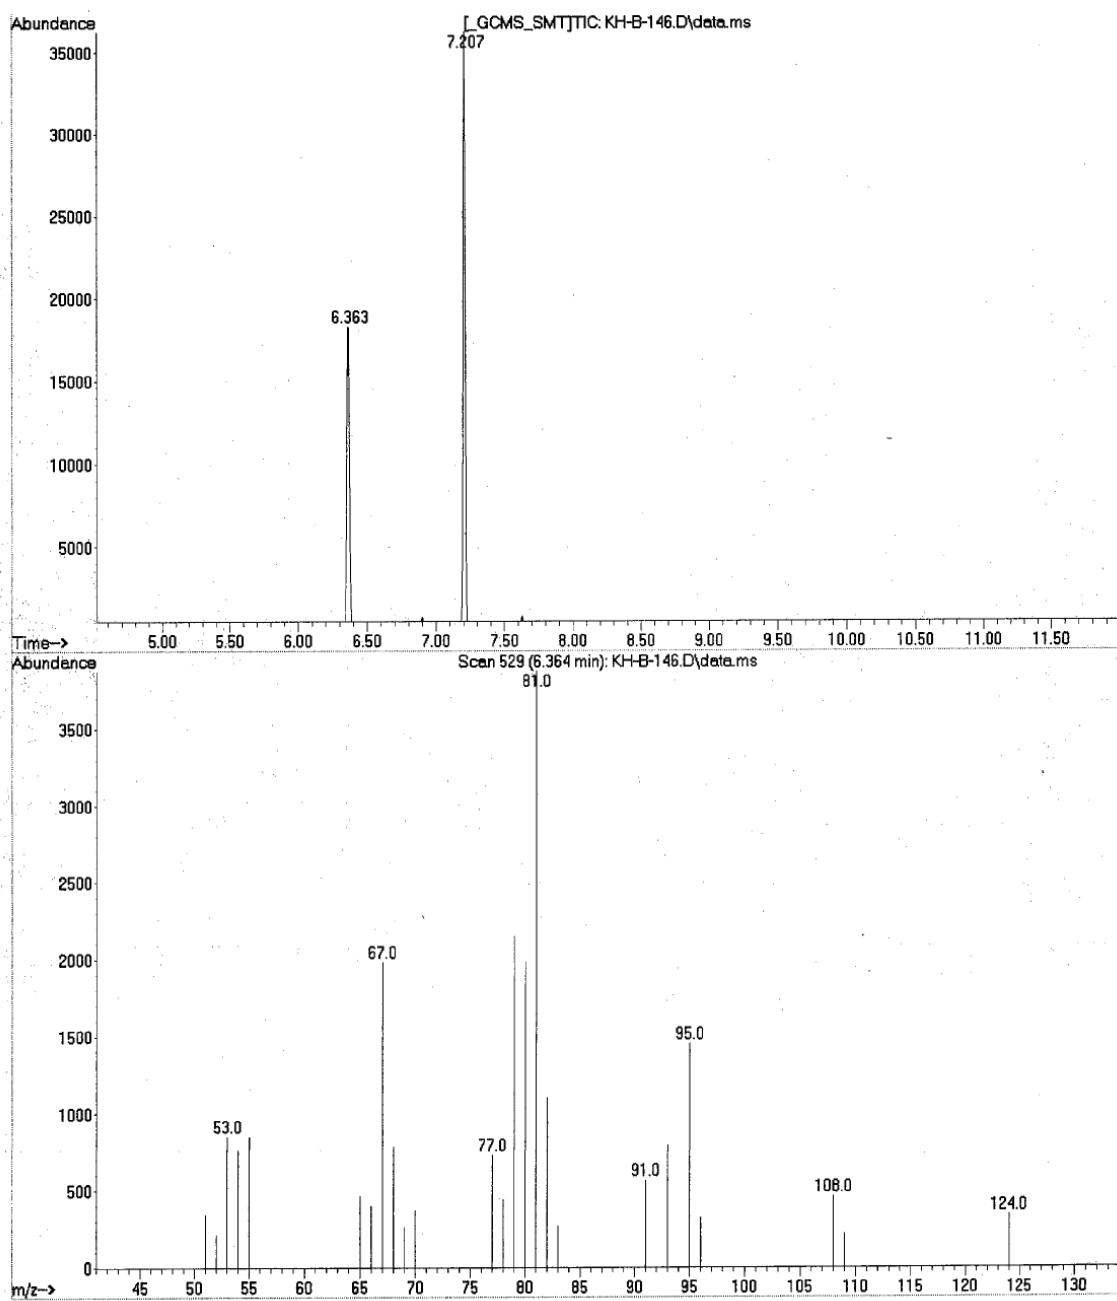

**Entry 12:** R (+) Limonene,  $R_t = 5.820$  min. (+) limonene oxide,  $R_t = 6.751$  and  $6.786$  min. Dodecane internal standard,  $R_t = 7.208$  min. Confirmed against standard (+) limonene oxide,  $R_t = 6.751$  and  $6.786$  min.

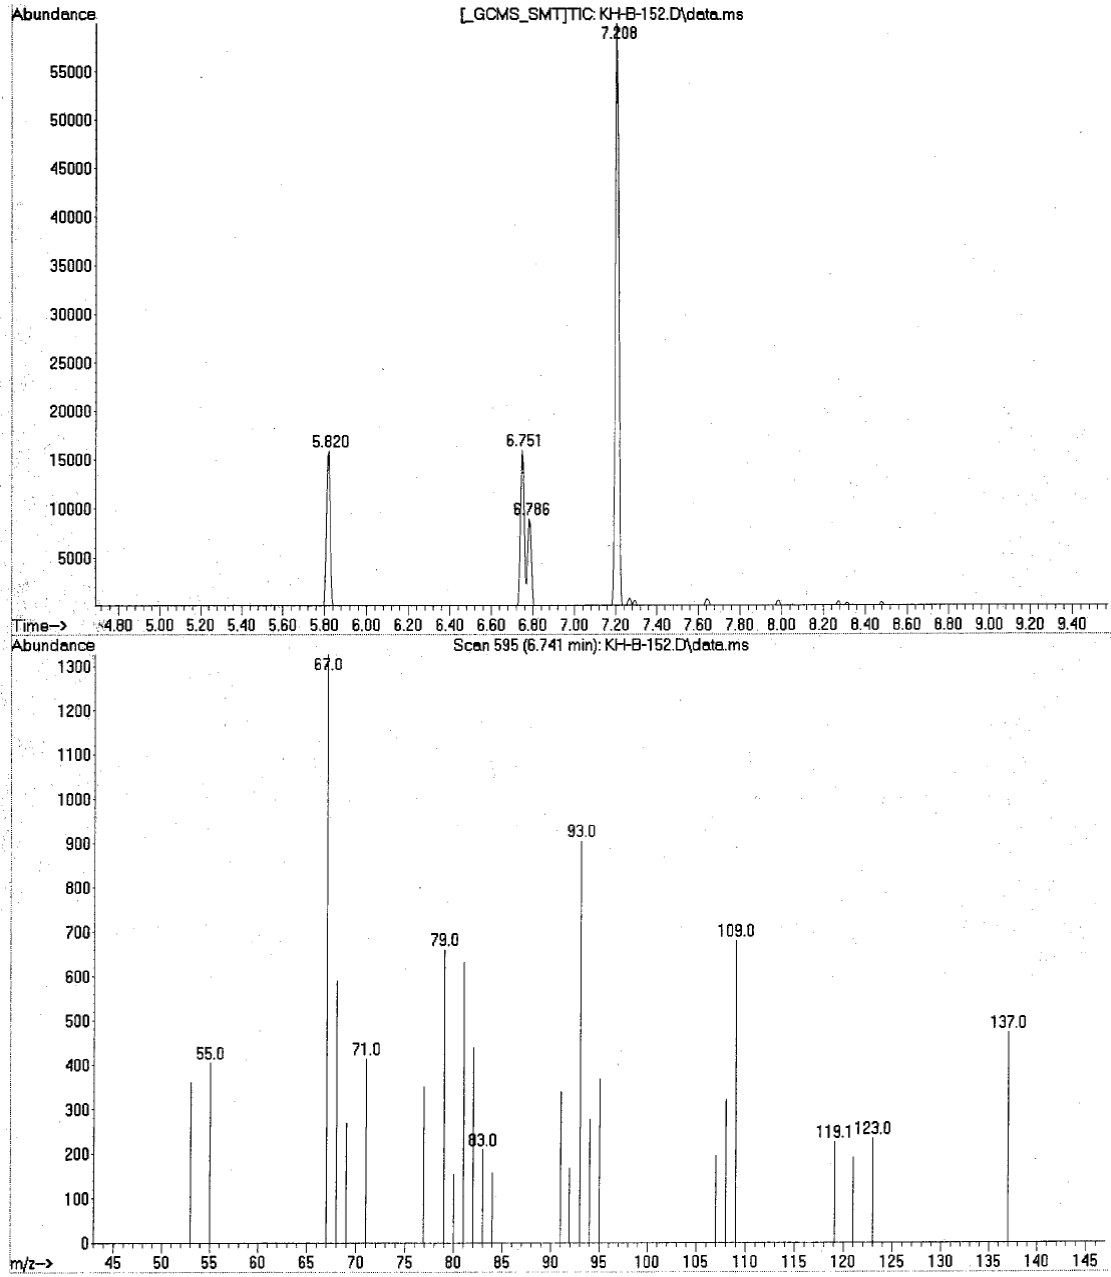

**Entry 13:** S (-) Limonene,  $R_t = 5.819$  min. (-) limonene oxide,  $R_t = 6.750$  and  $6.784$  min. Dodecane internal standard,  $R_t = 7.207$  min. Unidentified oxidized products at  $R_t = 7.977$  and  $8.311$  min.

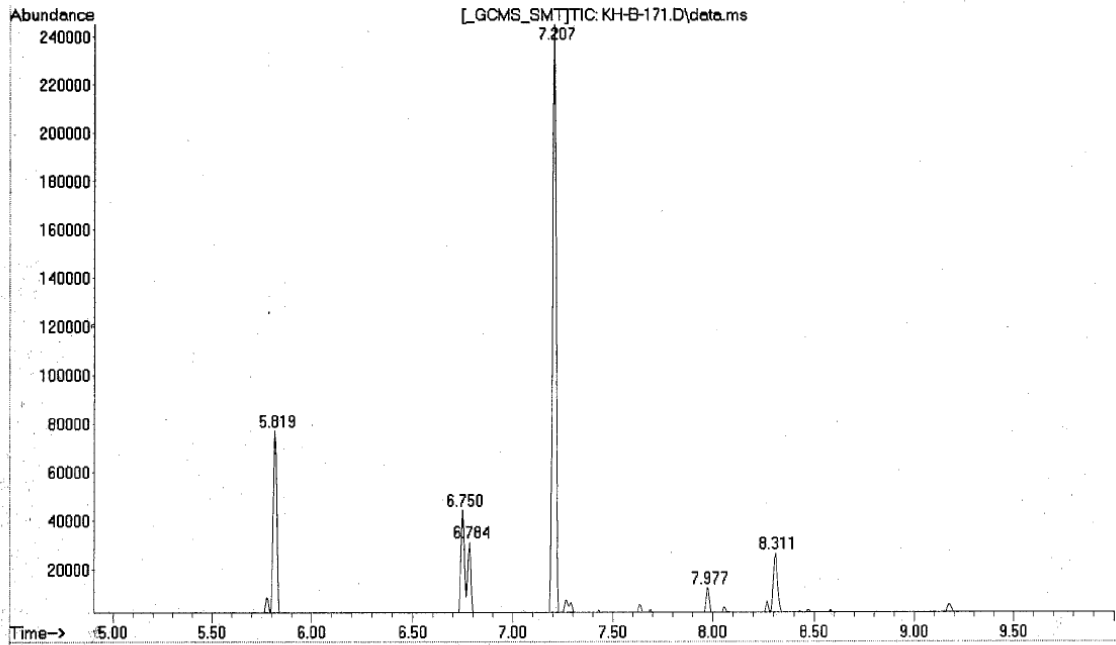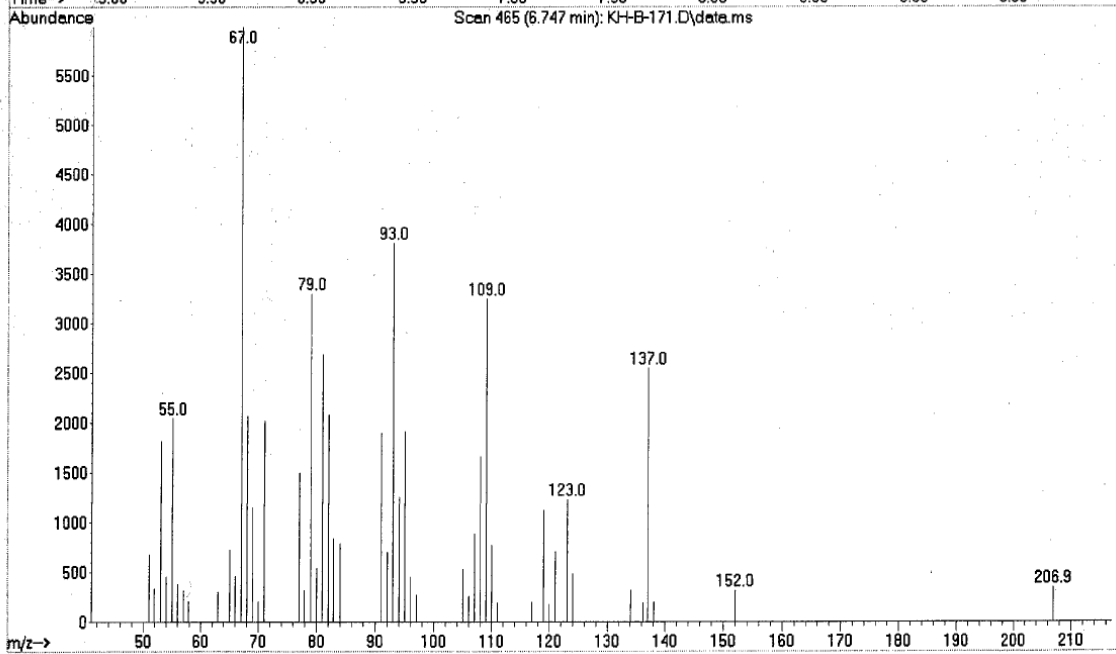

**GC Traces and Mass Spectra of Selected Products Given in Table 5:**

**Entry 1:** Dodecane internal standard,  $R_t = 4.92$  min. *trans*-Stilbene,  $R_t = 8.35$  min. *trans*-Stilbene oxide,  $R_t = 8.41$  min.

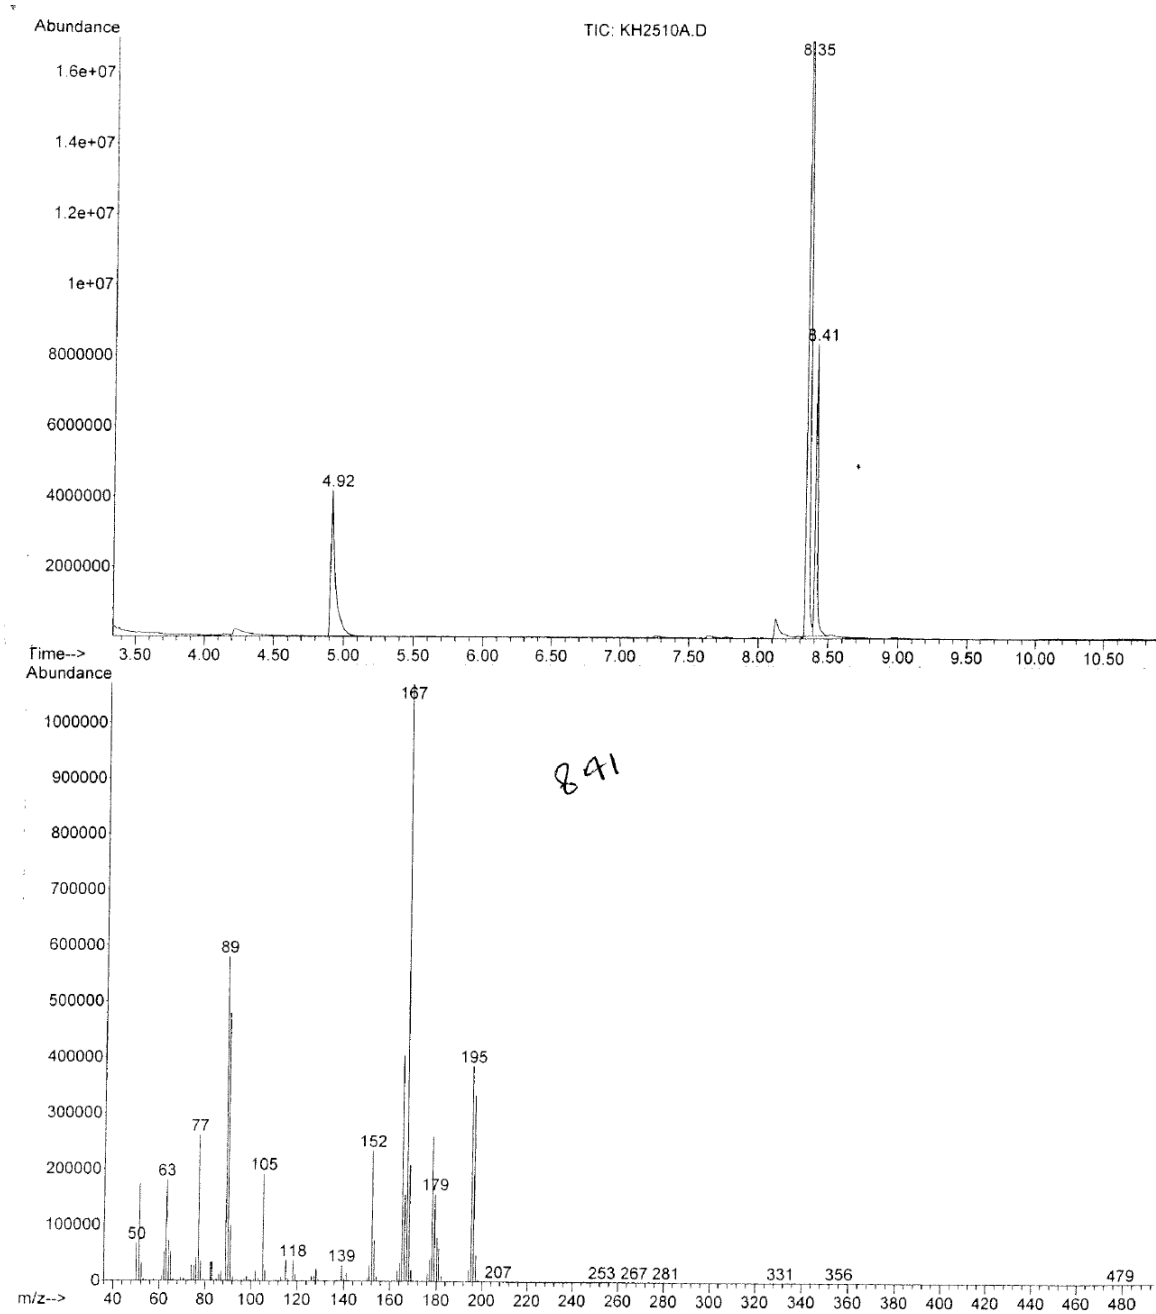

**Entry 2:** Dodecane internal standard,  $R_t = 5.08$  min. *trans*-Stilbene,  $R_t = 8.54$  min. *trans*-Stilbene oxide,  $R_t = 8.61$  min.

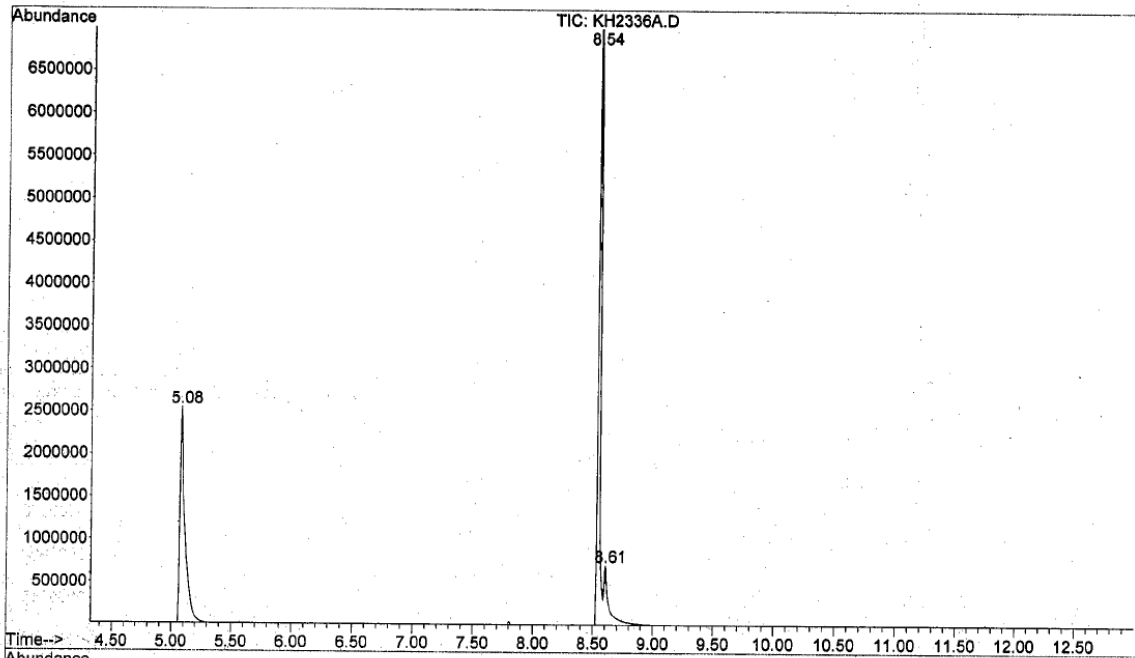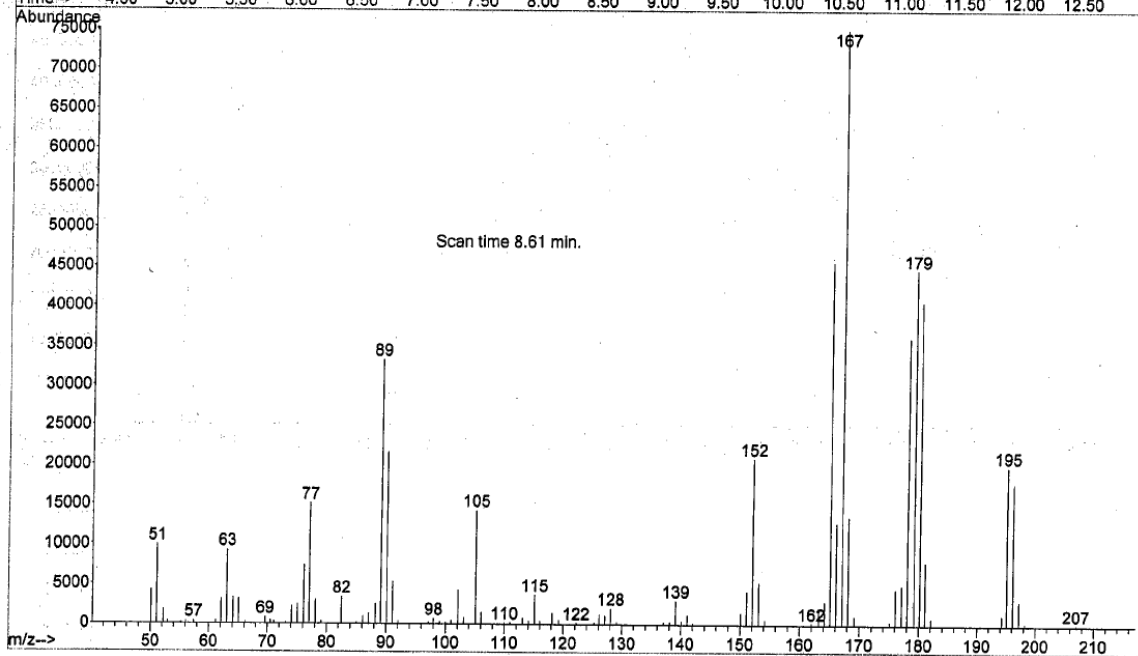

**Entry 3:** Dodecane internal standard,  $R_t = 5.08$  min. *trans*-Stilbene,  $R_t = 8.54$  min.  
*trans*-Stilbene oxide,  $R_t = 8.60$  min.

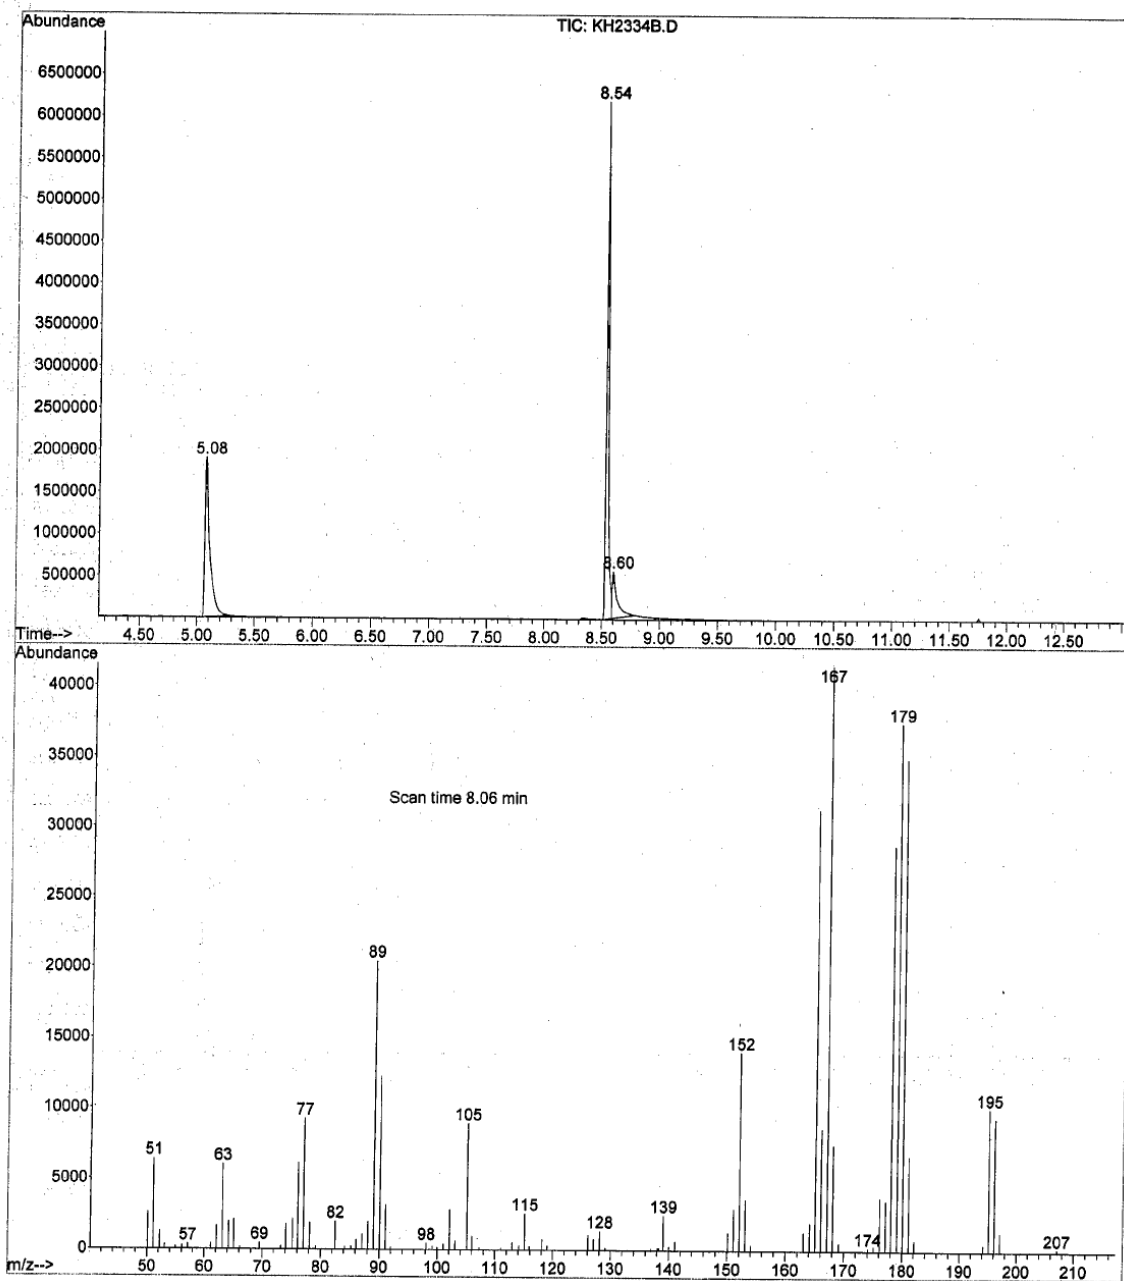

**Entry 4:** Dodecane internal standard,  $R_t = 5.08$  min. *trans*-Stilbene,  $R_t = 8.54$  min. *trans*-Stilbene oxide,  $R_t = 8.60$  min.

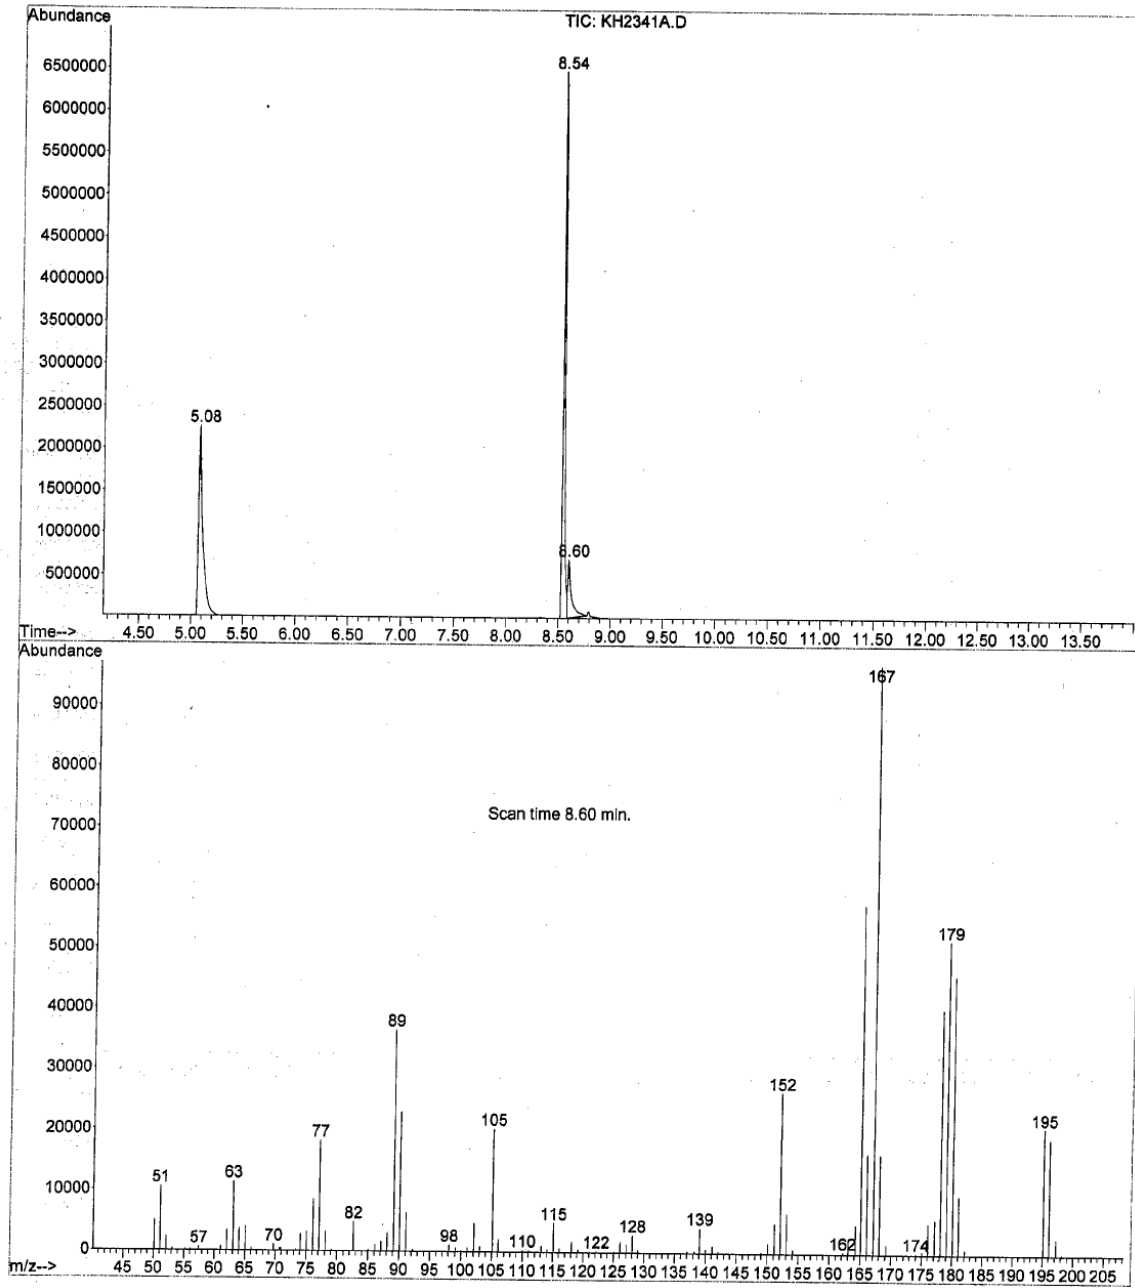

**GC Traces and Mass Spectra of Selected Products Given in Table 6:**

**Entry 1:** Dodecane internal standard,  $R_t = 6.183$  min. *trans*-Stilbene,  $R_t = 10.801$  min. *trans*-Stilbene oxide,  $R_t = 10.882$  min. Isomer of *trans*-stilbene oxide  $R_t = 10.520$  min. Unidentified by-product  $R_t = 5.133$  min.

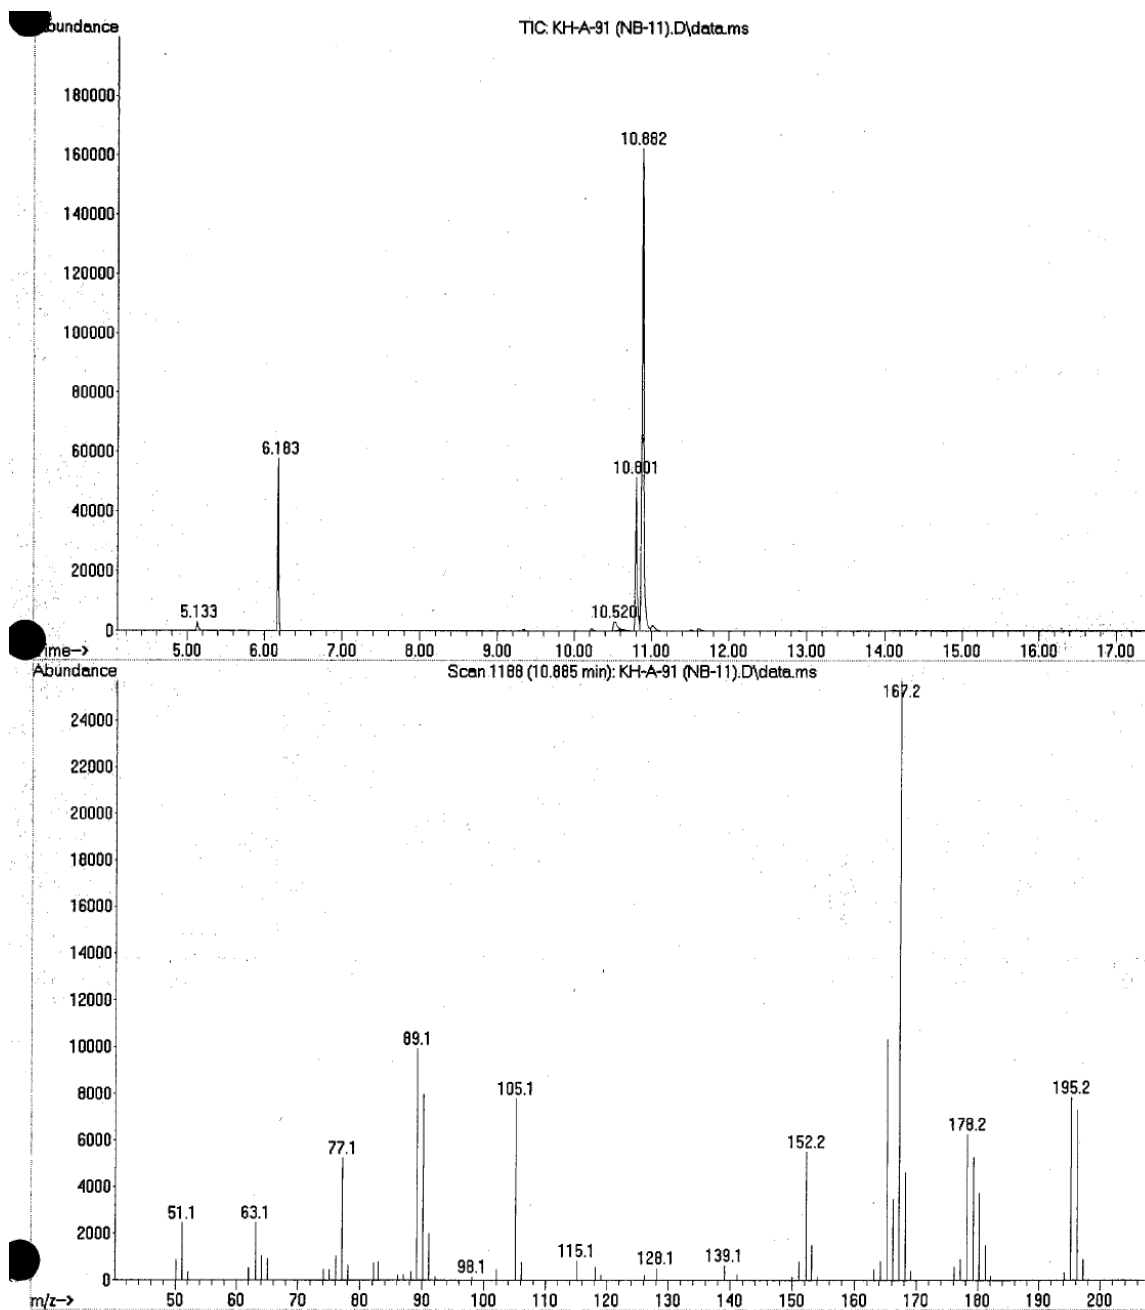



**Entry 2:** Dodecane internal standard,  $R_t = 4.75$  min. *trans*-Stilbene,  $R_t = 8.25$  min. *trans*-Stilbene oxide,  $R_t = 8.02$  min. and  $R_t = 8.56$  min. Unidentified by-product  $R_t = 7.47$  min.

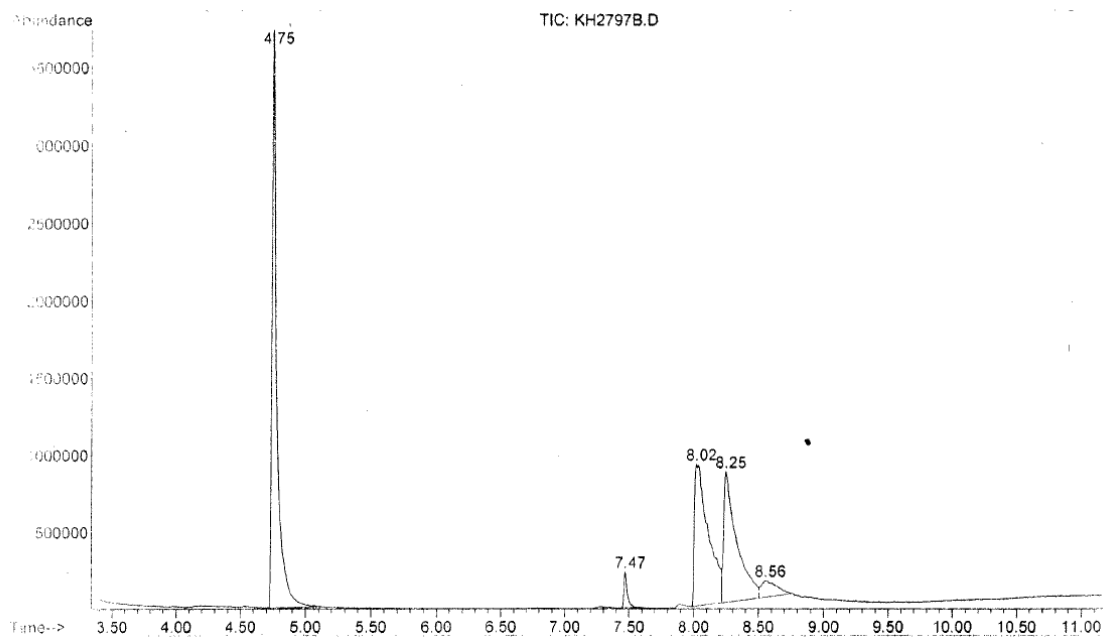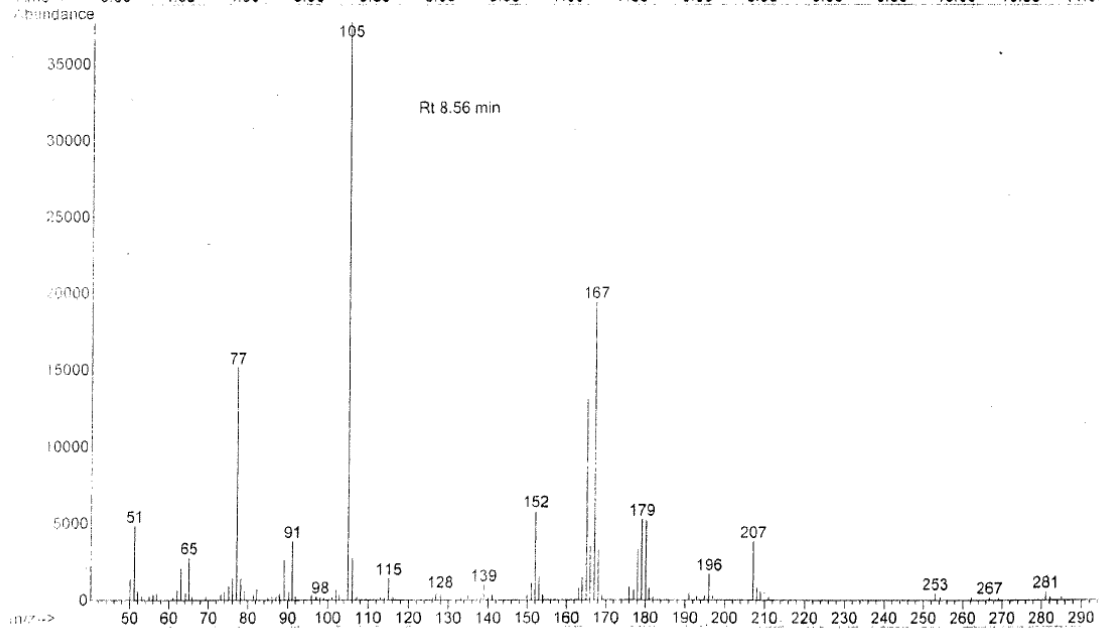

**Entry 3:** Dodecane internal standard,  $R_t = 7.247$  min. *trans*-Stilbene,  $R_t = 10.709$  min. *trans*-Stilbene oxide,  $R_t = 10.769$  min. By-product benzaldehyde,  $R_t = 5.199$  min.

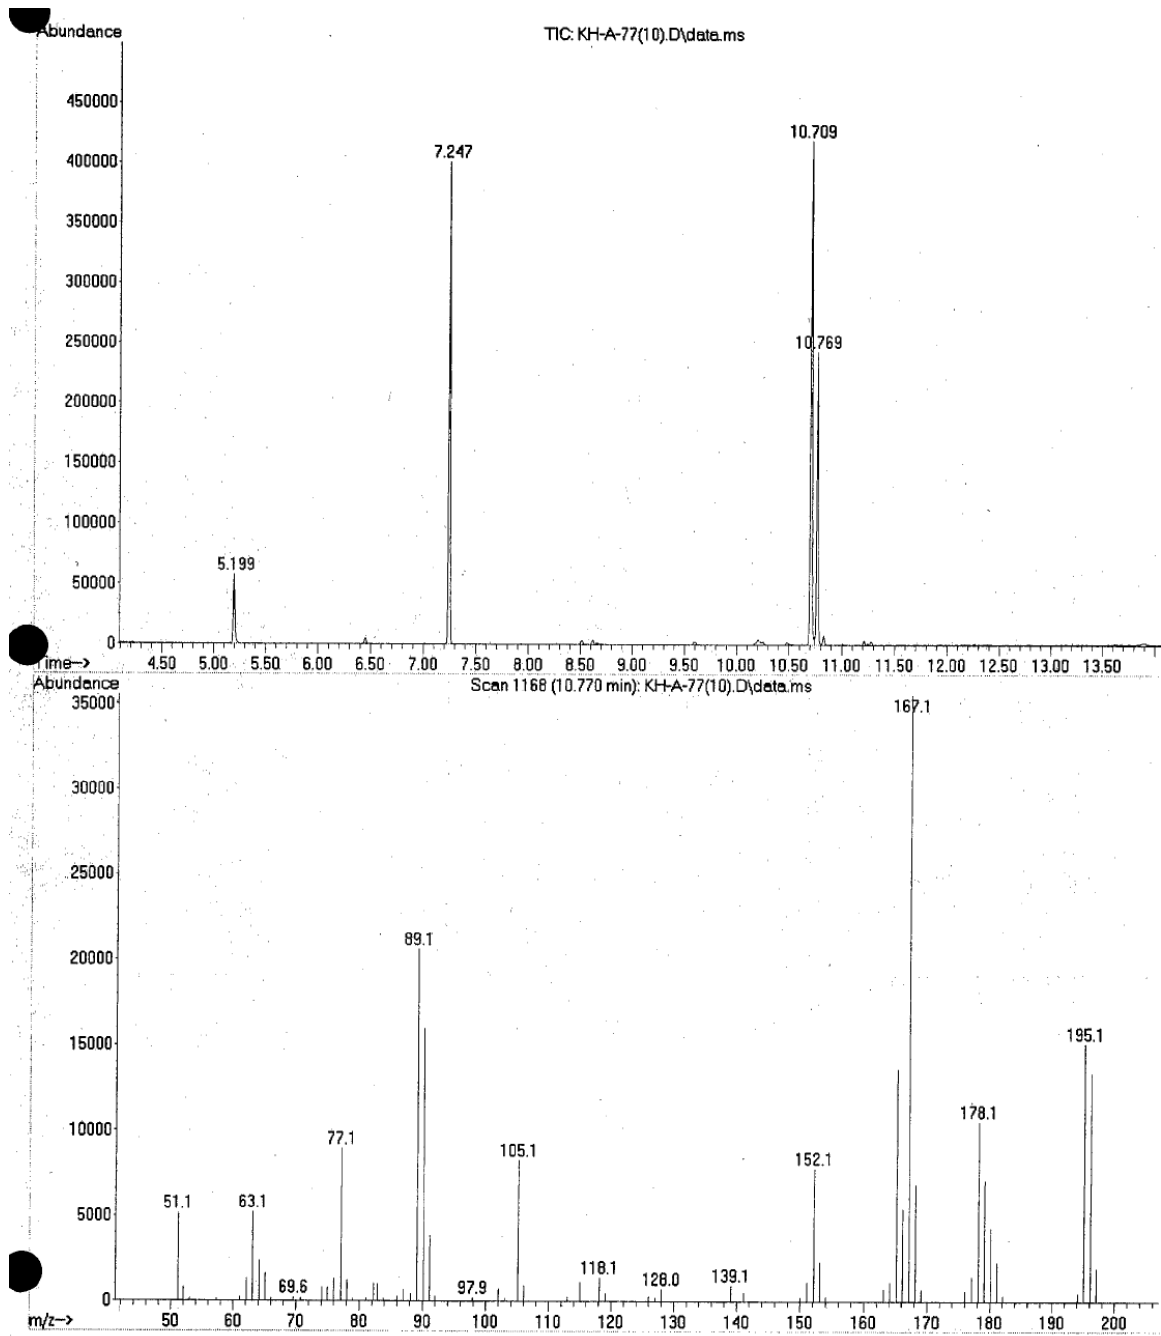

**Entry 4:** Dodecane internal standard,  $R_t = 6.135$  min. *trans*-Stilbene,  $R_t = 10.743$  min. *trans*-Stilbene oxide,  $R_t = 10.823$  min. Isomer of *trans*-Stilbene oxide,  $R_t = 10.437$  min.

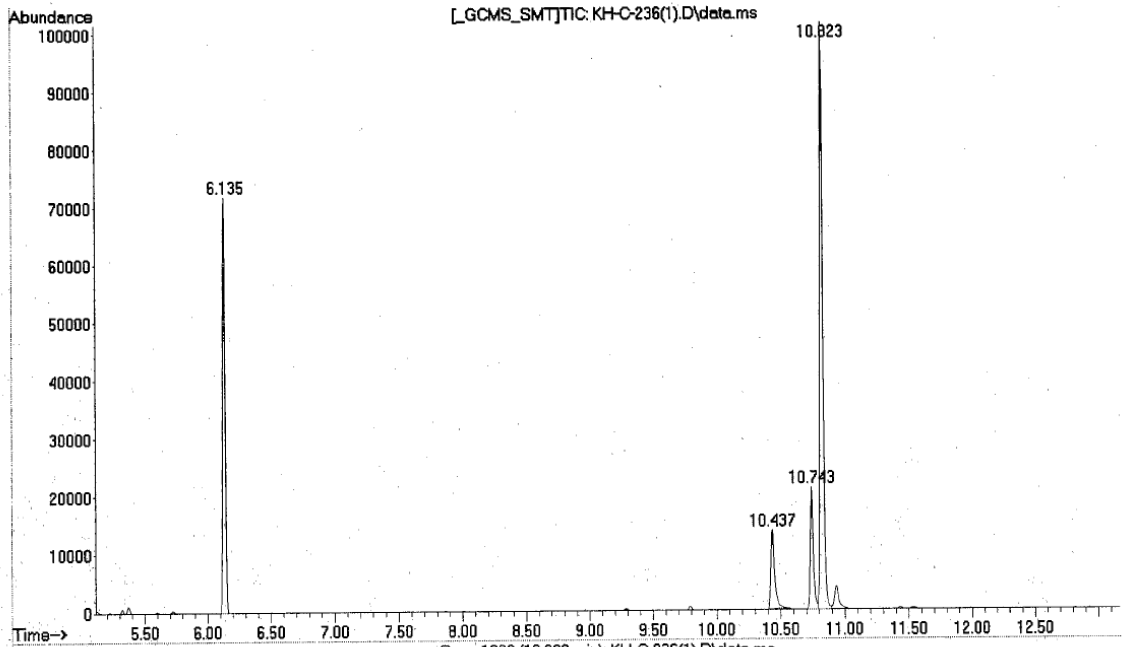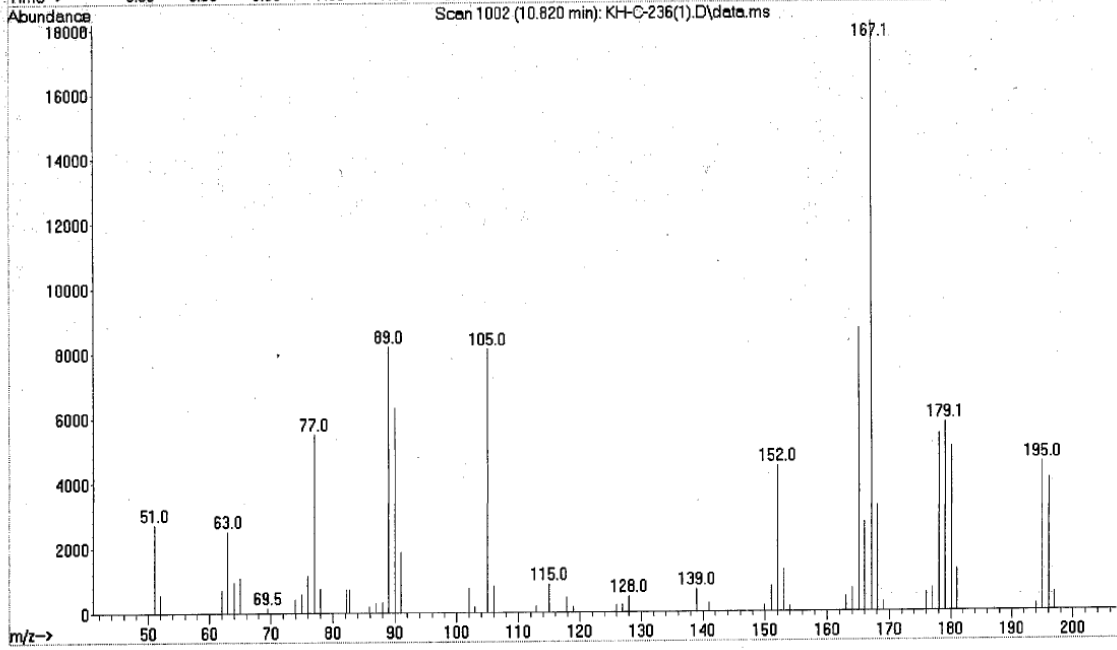

**Entry 5:** Dodecane internal standard,  $R_t = 4.75$  min. *trans*-Stilbene,  $R_t = 8.23$  min.  
*trans*-Stilbene oxide,  $R_t = 8.01$  min. and  $R_t = 8.55$  min.

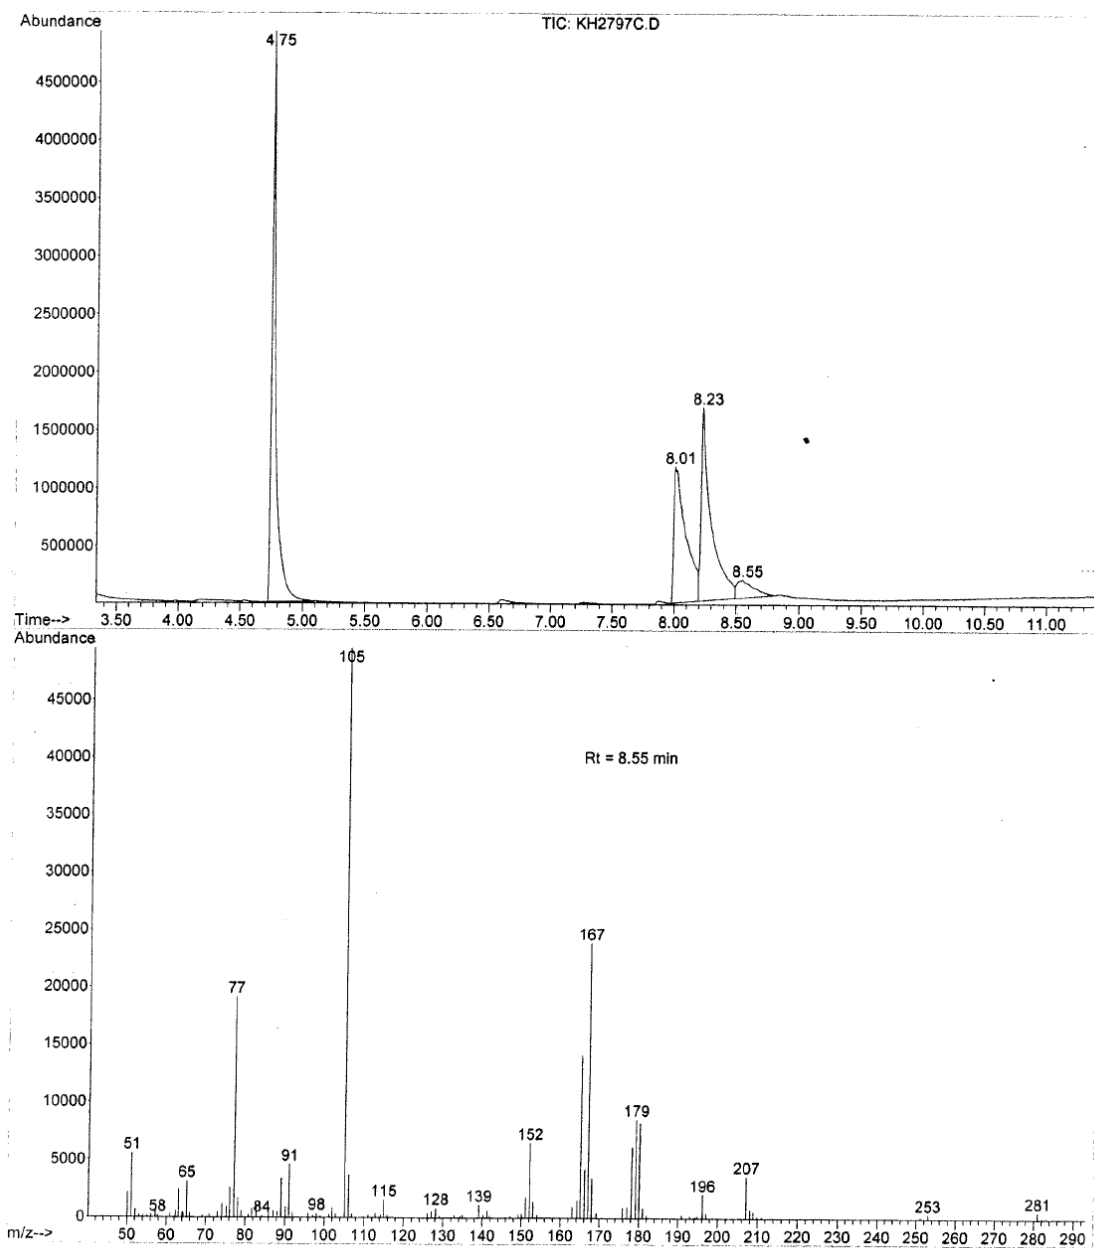

**Entry 6:** Dodecane internal standard,  $R_t = 7.247$  min. *trans*-Stilbene,  $R_t = 10.709$  min.  
*trans*-Stilbene oxide,  $R_t = 10.770$  min. By-product benzaldehyde,  $R_t = 5.200$  min.

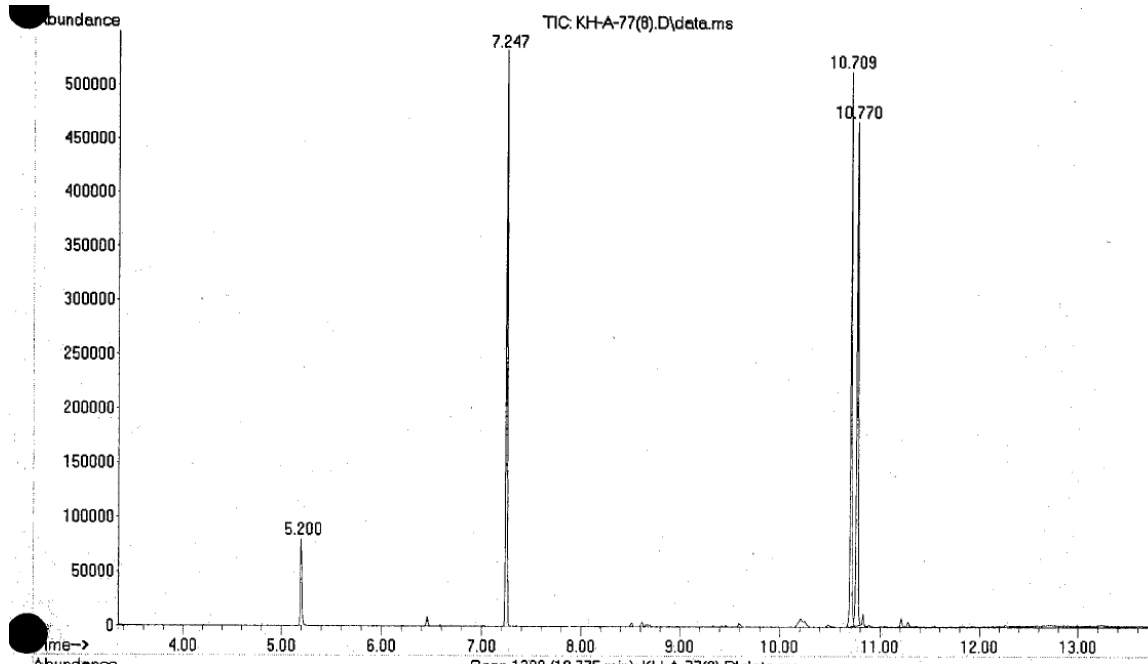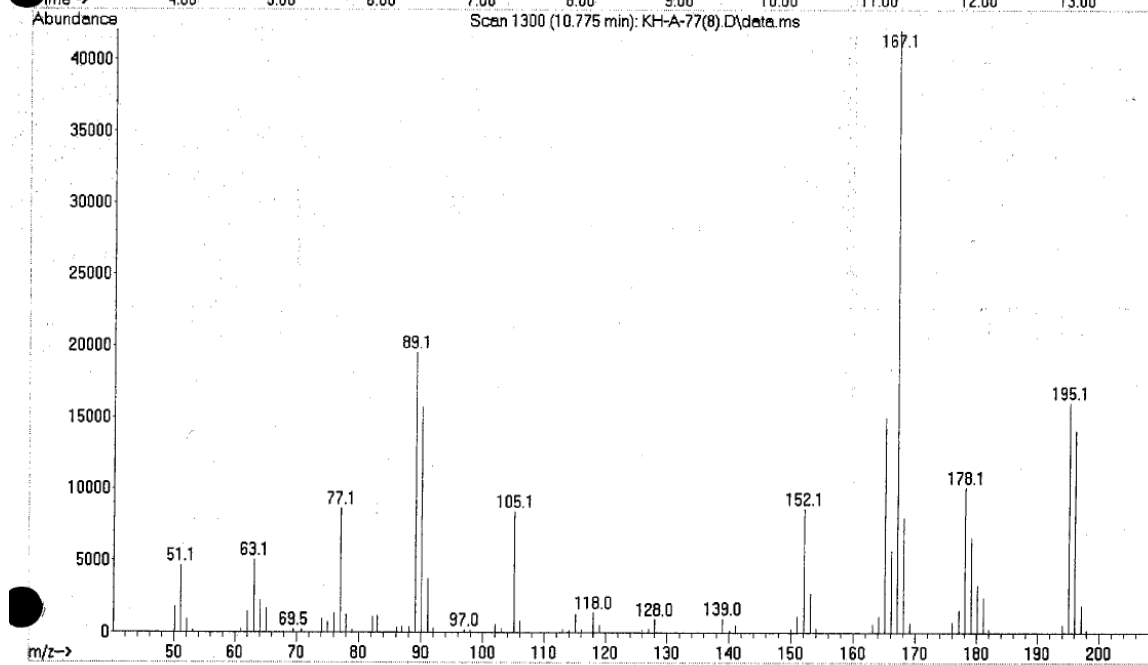

## Reaction progress monitoring: Epoxidation of *trans*-stilbene (Figure 3A & B)

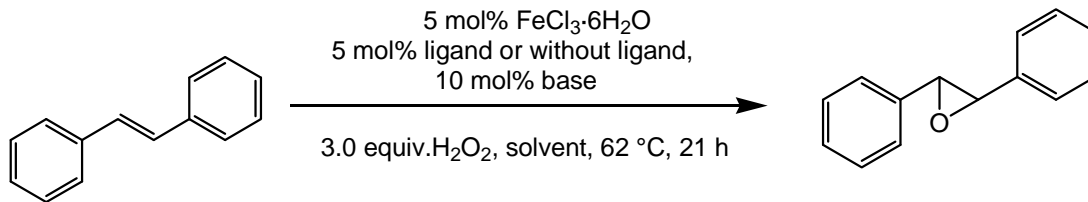

Catalytic systems: A)  $\text{FeCl}_3 \cdot 6\text{H}_2\text{O}$  and 1-methylimidazole  
B)  $\text{FeCl}_3 \cdot 6\text{H}_2\text{O}$ , 1-methylimidazole and proligand  $\text{H}_2\text{L7}$

A)  $\text{FeCl}_3 \cdot 6\text{H}_2\text{O}$  and 1-methylimidazole, GC-MS spectrum after 21 h.  
Dodecane internal standard,  $R_t = 6.136$  min. *trans*-Stilbene oxide,  $R_t = 10.824$  min.

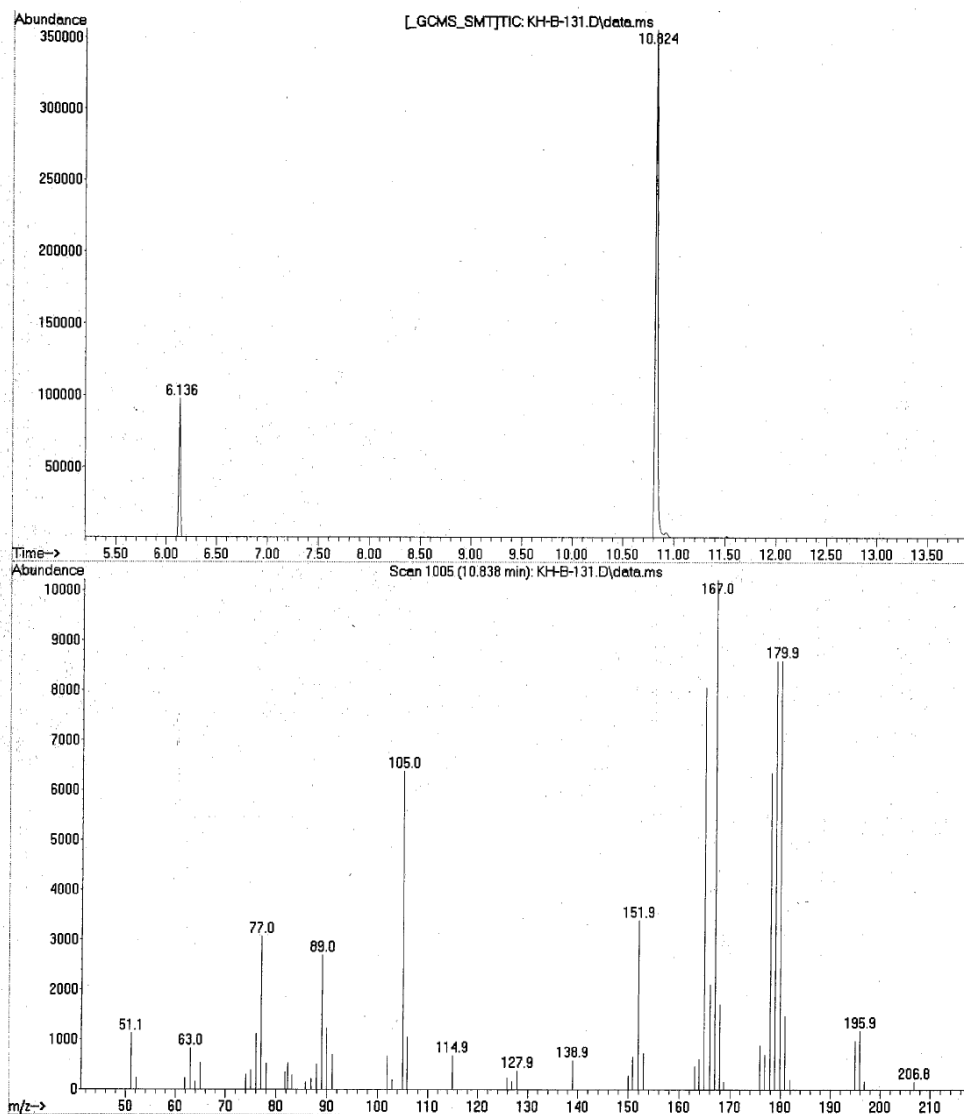

B)  $\text{FeCl}_3 \cdot 6\text{H}_2\text{O}$ , 1-methylimidazole and proligand  $\text{H}_2\text{L7}$ . GC-MS spectrum after 19 h.

Dodecane internal standard,  $R_t = 6.136$  min. *trans*-Stilbene,  $R_t = 10.743$  min. *trans*-Stilbene oxide,  $R_t = 10.821$  min. Isomer of *trans*-stilbene,  $R_t = 9.290$  min.

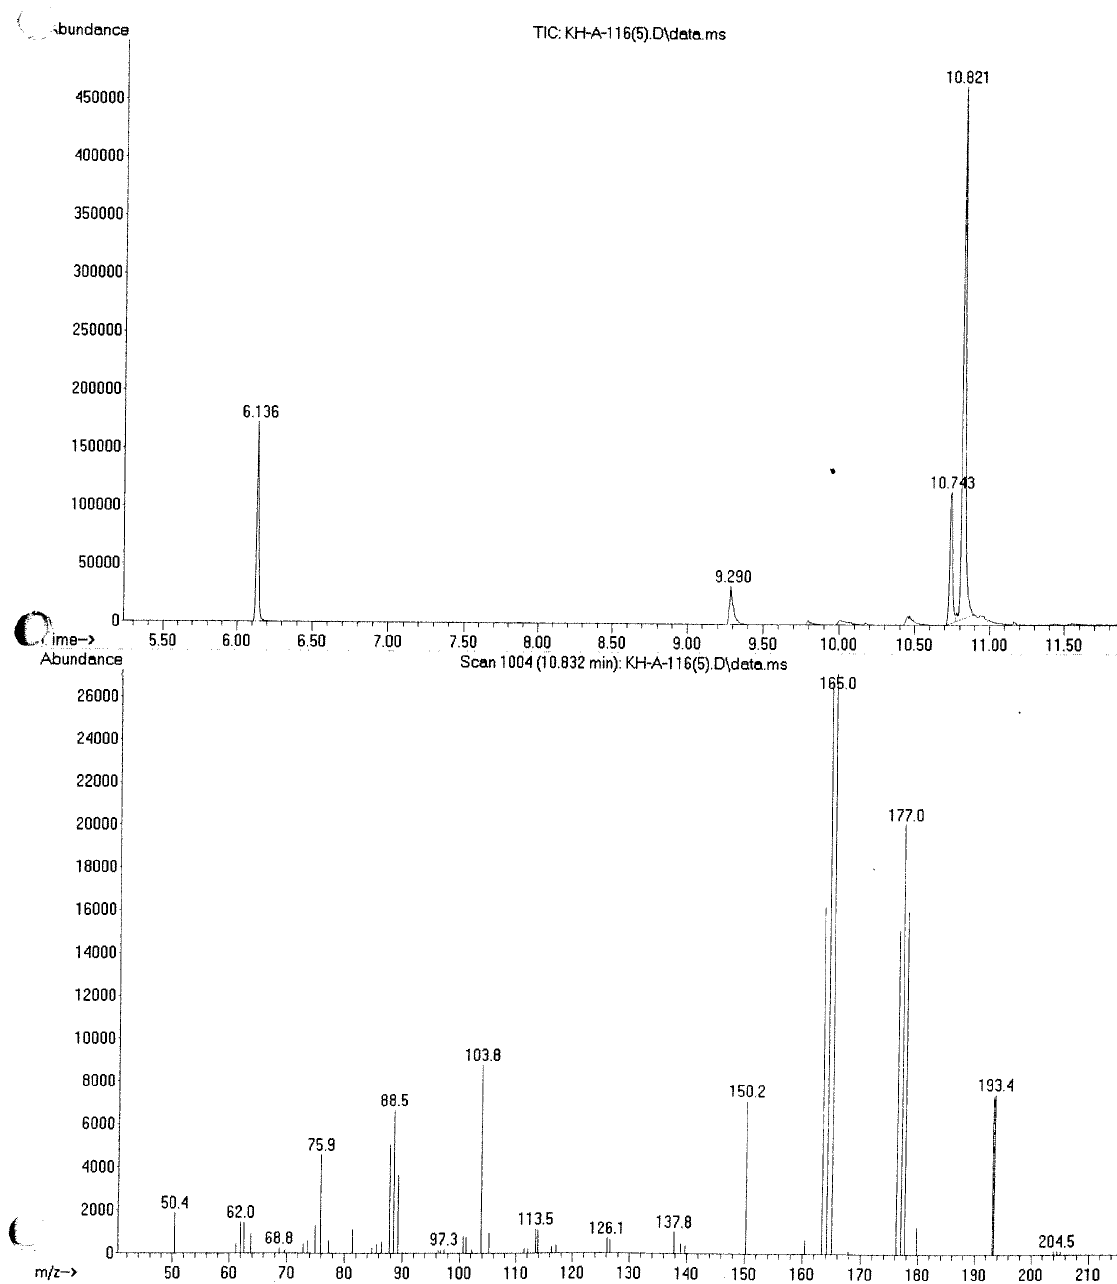

Supplement: c0gc00943a.pdf [file c0gc00943a.pdf]
